# Supplementary material for: Prey type and foraging ecology of Sanderlings Calidris alba in different climate zones: are tropical areas more favourable than temperate sites?
Source: PeerJ. 2015 Aug 11;3:e1125. doi: 10.7717/peerj.1125 (PMC4540009; doi:10.7717/peerj.1125)
Supplement: Supplemental Information 1 [file peerj-03-1125-s001.xlsx]

## Sheet: Ghana benthos sampling
						Donax pulchellus	Donax sp.				Polychates		Shrimp		Other
Date	Number	Time	tide	31U	UTM	Small	Medium	Large	tot shell	Hydrobia sp.	# per species	Size (cm)	#	Size (cm)	# per species	Size(cm)	kJ p sample	# per species	kJ/m2
2008-01-16	1	07:37:00	4	571822	545155	1	621	10	632	0	0	0	2	-	0	0	142.711	0	8184.54
2008-01-16	2	07:50:00	4	571585	545219	3	843	11	857	0	0	0	0	0	0	0	193.163	0	11078
2008-01-16	3	08:01:00	4	571426	545264	0	9	1	10	0	0	0	0	0	0	0	2.2615	0	129.698
2008-01-16	4	08:09:00	4	571274	545318	0	1	0	1	0	0	0	0	0	0	0	0.22615	0	12.9698
2008-01-16	5	08:18:00	5	571184	545349	0	3	0	3	0	0	0	0	0	0	0	0.678449	0	38.9094
2008-01-16	6	08:20:00	5	571093	545382	0	28	0	28	0	0	0	1	0.8	0	0	6.33219	0	363.155
2008-01-16	7	08:33:00	5	570969	545422	0	6	0	6	0	0	0	0	0	0	0	1.3569	0	77.8189
2008-01-16	8	08:39:00	5	570878	545453	0	4	0	4	0	0	0	1	1.1	0	0	0.904598	0	51.8793
2008-01-16	9	08:47:00	5	570778	545494	0	1354	7	1361	0	0	0	0	0	0	0	307.79	0	17651.9
2008-01-16	10	08:53:00	5	570681	545532	0	2	0	2	0	0	0	0	0	0	0	0.452299	0	25.9396
2008-01-16	11	09:04:00	5	570685	545538	0	12	0	12	0	0	0	0	0	0	0	2.7138	0	155.638
2008-01-16	12	09:11:00	5	570492	545585	1	2	0	3	0	1	2	0	0	0	0	0.462588	1 TR	26.5297
2008-01-16	13	09:18:00	6	570393	545625	2	200	6	208	0	0	0	0	0	0	0	46.6074	0	2672.96
2008-01-16	14	09:26:00	6	570296	545659	6	489	8	503	0	0	0	0	0	0	0	112.458	0	6449.54
2008-01-16	15	10:02:00	6	570130	545730	0	189	9	198	0	0	0	1	-	0	0	44.7776	0	2568.02
2008-01-16	16	10:13:00	-6	570030	545749	0	3	0	3	0	0	0	0	0	0	0	0.678449	0	38.9094
2008-01-16	17	10:24:00	-6	569881	545788	0	2	0	2	0	0	0	0	0	0	0	0.452299	0	25.9396
2008-01-16	18	10:33:00	-6	569770	545823	13	250	0	263	0	0	0	4	-	0	0	56.6712	0	3250.12
2008-01-16	19	10:41:00	-6	569685	545842	0	1	0	1	0	0	0	0	0	0	0	0.22615	0	12.9698
2008-01-16	20	10:49:00	-6	569599	545869	3	1866	23	1892	0	0	0	0	0	0	0	427.227	0	24501.7
2008-01-16	21	10:55:00	-6	569502	545888	6	247	4	257	0	0	0	0	0	0	0	56.8253	0	3258.96
2008-01-16	22	14:41:00	5	569401	545891	0	1	0	1	0	0	0	0	0	0	0	0.22615	0	12.9698
2008-01-16	23	14:54:00	5	569289	545929	0	5	4	9	0	0	0	1	1.3	0	0	2.03535	0	116.728
2008-01-16	24	15:03:00	4	569169	545953	0	1	0	1	0	0	0	0	0	0	0	0.22615	0	12.9698
2008-01-16	25	15:12:00	4	569100	545984	0	1	0	1	0	0	0	0	0	0	0	0.22615	0	12.9698
2008-01-16	26	15:22:00	4	569009	546018	1	0	0	1	0	0	0	0	0	0	0	0.0102888	0	0.59007
2008-01-16	27	15:29:00	4	568894	546053	0	0	0	0	0	1	7.8	0	0	0	0	0	1 RY	0
2008-01-16	28	15:37:00	4	568822	546085	0	0	0	0	0	0	0	0	0	0	0	0	0	0
2008-01-16	29	15:42:00	4	568736	546134	10	1240	9	1259	0	0	0	0	0	0	0	282.564	0	16205.2
2008-01-16	30	15:49:00	4	568644	546165	0	0	3	3	0	0	0	0	0	0	0	0.678449	0	38.9094
2008-01-16	31	15:56:00	4	568539	546203	0	11	1	12	0	1	5	0	0	0	0	2.7138	1 TR	155.638
2008-01-16	32	16:05:00	3	568541	546203	0	0	0	0	0	1	4.7	0	0	0	0	0	1 RY	0
2008-01-16	33	16:10:00	3	568497	546231	0	201	30	231	4	0	0	0	0	0	0	52.2565	0	2996.94
2008-01-16	34	16:20:00	3	568583	546182	0	12	4	16	0	0	0	0	0	0	0	3.61839	0	207.517
2008-01-16	35	16:25:00	3	568662	546159	0	10	7	17	0	0	0	0	0	0	0	3.84454	0	220.487
2008-01-16	36	16:33:00	3	568744	546122	0	0	0	0	1	0	0	1	1.7	0	0	0.00398227	0	0.228386
2008-01-16	37	16:39:00	3	568833	546092	11	600	5	616	0	0	0	0	0	0	0	136.934	0	7853.23
2008-01-16	38	16:42:00	3	568919	546049	5	1351	33	1389	0	0	0	0	0	0	0	313.042	0	17953.2
2008-01-16	39	16:46:00	3	569023	546003	1	1163	43	1207	2	0	0	0	0	0	0	272.755	0	15642.6
2008-01-16	40	16:51:00	3	569112	545986	0	0	1	1	0	0	0	0	0	0	0	0.22615	0	12.9698
2008-01-16	41	16:57:00	3	569201	545959	0	0	0	0	0	0	0	0	0	0	0	0	0	0
2008-01-16	42	17:05:00	2	569286	545933	1	791	15	807	0	0	0	0	0	0	0	182.287	0	10454.3
2008-01-16	43	17:10:00	2	569376	545896	0	0	0	0	0	0	0	0	0	0	0	0	0	0
2008-01-16	44	17:23:00	2	569469	545877	0	0	1	1	0	0	0	0	0	0	0	0.22615	0	12.9698
2008-01-16	45	17:29:00	2	569557	545856	0	1	1	2	0	0	0	0	0	0	0	0.452299	0	25.9396
2008-01-17	46	09:03:00	4	569666	545836	0	1	0	1	1	0	0	0	0	0	0	0.230132	0	13.1982
2008-01-17	47	09:10:00	4	569744	545818	0	852	5	857	0	0	0	0	0	0	0	193.81	0	11115.1
2008-01-17	48	09:18:00	4	569839	545796	2	10	0	12	0	0	0	2	0.7, 0.8	0	0	2.28207	0	130.878
2008-01-17	49	09:24:00	4	569926	545770	0	1	0	1	0	0	0	1	?	0	0	0.22615	0	12.9698
2008-01-17	50	09:32:00	5	570014	545747	0	945	14	959	0	0	0	0	0	0	0	216.877	0	12438.1
2008-01-17	51	09:36:00	5	570106	545718	0	0	0	0	0	0	0	1	0.8	0	0	0	0	0
2008-01-17	52	09:42:00	5	570188	545693	0	3	0	3	0	0	0	0	0	0	0	0.678449	0	38.9094
2008-01-17	53	09:48:00	5	570280	545659	0	600	6	606	0	0	0	0	0	0	0	137.047	0	7859.71
2008-01-17	54	09:58:00	5	570365	545632	0	323	17	340	0	0	0	0	0	0	0	76.8909	0	4409.74
2008-01-17	55	10:18:00	5	570459	545606	0	658	30	688	0	0	0	0	0	0	0	155.591	0	8923.23
2008-01-17	56	10:24:00	5	570534	545573	0	716	19	735	0	0	0	0	0	0	0	166.22	0	9532.81
2008-01-17	57	10:39:00	6	570622	545558	10	462	29	501	0	0	0	0	0	0	0	111.142	0	6374.08
2008-01-17	58	10:44:00	6	570720	545512	4	964	20	988	0	0	0	0	0	0	0	222.572	0	12764.7
2008-01-17	59	10:49:00	6	570814	545471	0	512	6	518	0	0	0	0	0	1 fish	1.5	117.145	0	6718.36
2008-01-17	60	11:05:00	6	570903	545449	0	935	0	935	0	0	0	0	0	0	0	211.45	0	12126.8
2008-01-17	61	11:10:00	6	570993	545417	0	1002	9	1011	0	0	0	0	0	0	0	228.637	0	13112.5
2008-01-17	62	11:15:00	6	571086	545383	0	5	0	5	0	0	0	0	0	0	0	1.13075	0	64.8491
2008-01-17	63	11:29:00	6	571165	545354	0	16	0	16	0	0	0	0	0	0	0	3.61839	0	207.517
2008-01-17	64	11:34:00	-6	571270	545318	2	19	0	21	0	0	0	0	0	0	0	4.31742	0	247.607
2008-01-17	65	11:44:00	-6	571354	545295	0	286	0	286	0	0	0	0	0	0	0	64.6788	0	3709.37
2008-01-17	66	11:56:00	-6	571454	545270	12	1008	54	1074	18	0	0	0	0	0	0	240.366	0	13785.1
2008-01-17	67	12:01:00	-6	571543	545235	7	985	48	1040	0	0	0	0	0	0	0	233.685	0	13401.9
2008-01-17	68	12:06:00	-6	571639	545201				0								0		0
2008-01-17	69	12:11:00	-6	571732	545183	0	1400	3	1403	0	0	0	0	0	0	0	317.288	0	18196.6
2008-01-17	70	12:17:00	-6	571816	545149	0	21	0	21	0	0	0	0	0	0	0	4.74914	0	272.366
2008-01-17	-	12:25:00	-6	571904	545181	0	0	0	0	0	0	0	0	0	1 crab	3	0	0	0
2008-01-17	72	12:32:00	-5	571995	545098	0	0	0	0	0	0	0	0	0	0	0	0	0	0
2008-01-17	71	12:38:00	-5	572086	545069	9	510	16	535	0	0	0	0	0	0	0	119.047	0	6827.43
2008-01-17	74	13:01:00	-5	572165	545002	12	700	20	732	0	0	0	0	0	0	0	162.951	0	9345.35
2008-01-17	75	13:06:00	-5	572251	544991	0	1426	31	1457	0	0	0	0	0	0	0	329.5	0	18897
2008-01-17	76	13:12:00	-5	572346	544962	1	311	9	321	0	0	0	0	0	0	0	72.3782	0	4150.93
2008-01-17	77	13:16:00	-5	572440	544944	5	762	7	774	0	0	0	0	0	0	0	173.96	0	9976.74
2008-01-18	78	07:50:00	2	572595	544851	0	0	0	0	1	1	0.8	0	0	0	0	0.00398227	1 TR	0.228386
2008-01-18	79	07:57:00	2	572687	544836	0	0	0	0	0	1	-	0	0	0	0	0	1 TY	0
2008-01-18	80	08:03:00	2	572782	544806	0	1	0	1	0	0	0	0	0	0	0	0.22615	0	12.9698
2008-01-18	81	08:08:00	2	572869	544790	128	162	0	290	4	0	0	0	0	0	0	37.9691	0	2177.55
2008-01-18	82	08:49:00	2	572961	544754	1	0	0	1	1	0	0	0	0	0	0	0.0142711	0	0.818456
2008-01-18	83	10:40:00	4	573153	544703	0	2	0	2	0	0	0	0	0	0	0	0.452299	0	25.9396
2008-01-18	84	10:52:00	5	573242	544671	0	3	0	3	0	2	2 x 1cm	0	0	0	0	0.678449	2 RY	38.9094
2008-01-18	85	11:04:00	5	573355	544631	47	71	0	118	0	0	0	0	0	0	0	16.5402	0	948.59
2008-01-18	86	11:22:00	5	573434	544615	2	370	8	380	0	0	0	0	0	0	0	85.5051	0	4903.77
2008-01-18	87	11:28:00	5	573522	544576	7	1156	19	1182	4	0	0	0	0	0	0	265.814	0	15244.6
2008-01-18	88	11:33:00	5	573607	544553	0	648	26	674	0	0	0	0	0	0	0	152.425	0	8741.65
2008-01-18	89	11:37:00	5	573693	544525	0	754	15	769	0	0	0	0	0	0	0	173.909	0	9973.79
2008-01-18	90	11:46:00	5	573775	544490	0	1132	28	1160	0	0	0	0	0	0	0	262.334	0	15045
2008-01-18	91	11:53:00	6	573864	544449				0								0		0
2008-01-18	92	11:58:00	6	573943	544406	26	1596	33	1655	6	0	0	0	0	0	0	368.689	0	21144.5
2008-01-18	93	12:04:00	6	574023	544376	1	489	11	501	0	0	0	0	0	0	0	113.085	0	6485.5
2008-01-18	94	12:15:00	6	574116	544348				0								0		0
2008-01-18	95	12:20:00	6	574208	544322	0	630	17	647	0	0	0	0	0	0	0	146.319	0	8391.47
2008-01-18	96	12:26:00	6	574288	544291	10	857	5	872	0	0	0	0	0	0	0	195.044	0	11185.9
2008-01-18	97	12:30:00	6	574376	544256				0								0		0
2008-01-18	98	12:37:00	6	574467	544233	10	400	0	410	0	0	0	0	0	0	0	90.5627	0	5193.83
2008-01-18	99	12:43:00	6	574550	544199	0	0	0	0	0	2	3cm, 6cm	0	0	0	0	0	2 RY	0
2008-01-18	100	12:49:00	-6	574670	544150	0	0	0	0	0	0	0	0	0	0	0	0	0	0
2008-01-18	101	12:59:00	-6	574764	544133	0	400	19	419	0	0	0	0	0	0	0	94.7567	0	5434.35
2008-01-18	102	14:03:00	-4	574859	544100	124	821	7	952	14	0	0	0	0	0	0	188.583	0	10815.4
2008-01-18	103	14:09:00	-4	574947	544049	31	218	5	254	2	0	0	0	0	0	0	50.7583	0	2911.02
2008-01-18	104	14:25:00	-4	575028	544003	3	1	0	4	0	1	6	1	1	0	0	0.257016	1 RY	14.74
2008-01-18	105	14:33:00	-4	575108	543965	0	1	0	1	0	0	0	0	0	0	0	0.22615	0	12.9698
2008-01-18	106	14:40:00	-4	575205	543935	36	4	0	40	0	0	0	0	0	0	0	1.275	0	73.1218
2008-01-18	107	14:48:00	-4	575301	543902				0								0		0
2008-01-18	108	14:53:00	-3	575392	543875	11	202	2	215	2	0	0	0	0	0	0	46.2557	0	2652.79
2008-01-18	109	14:57:00	-3	575477	543840	4	252	0	256	0	0	0	0	0	0	0	57.0309	0	3270.75
2008-01-18	110	15:01:00	-3	575564	543809	25	186	8	219	2	0	0	0	0	0	0	44.1382	0	2531.35
2008-01-18	111	15:22:00	-3	575655	543851	16	161	3	180	0	0	0	0	0	0	0	37.2532	0	2136.49
2008-01-18	112	15:36:00	-3	575736	543719	199	800	16	1015	0	0	0	0	0	0	0	186.586	0	10700.8
2008-01-18	113	15:41:00	-3	575817	543689	0	1900	9	1909	0	0	0	0	0	0	0	431.72	0	24759.4
2008-01-18	114	15:46:00	-3	575890	543635	32	123	5	160	1	0	0	0	0	0	0	29.2804	0	1679.25
2008-01-18	115	16:01:00	-2	575971	543599	0	1048	17	1065	0	0	0	0	0	0	0	240.849	0	13812.9
2008-01-18	116	16:07:00	-2	576054	543562				0								0		0
2008-01-18	117	16:11:00	-2	576140	543525	6	669	0	675	0	0	0	0	0	0	0	151.356	0	8680.35
2008-01-18	118	16:17:00	-2	576220	543475	6	1	0	7	0	0	0	0	0	0	0	0.287883	0	16.5102
2008-01-18	119	16:21:00	-2	576306	543443	0	0	0	0	0	1	1	0	0	0	0	0	1 RY	0
2008-01-18	120	16:27:00	-2	576395	543411	0	0	0	0	0	1	-	0	0	0	0	0	1 FY	0
2008-01-18	121	16:33:00	-2	576477	543379	17	483	5	505	0	0	0	0	0	0	0	110.536	0	6339.3
2008-01-18	122	16:37:00	-2	576575	543339	2	106	0	108	0	0	0	0	0	0	0	23.9924	0	1375.98
2008-01-18	123	16:40:00	-2	576655	543303	0	0	2	2	0	0	0	0	0	0	0	0.452299	0	25.9396
2008-01-18	124	16:44:00	-2	576741	543270	0	0	0	0	0	0	0	0	0	1 britle star	1	0	0	0
2008-01-18	125	16:50:00	-1	576836	543235	0	0	0	0	0	0	0	1	1.5			0	0	0
2008-01-18	126	16:54:00	-1	576930	543208	0	0	0	0	0	0	0	0	0	1 britle star	1.2	0	0	0
2008-01-18	127	16:58:00	-1	577030	543165	0	18	1	19	0	0	0	0	0	0	0	4.29684	0	246.426
2008-01-18	128	17:04:00	-1	577124	543132	0	0	0	0	0	0	0	0	0	0	0	0	0	0
2008-01-18	129	17:08:00	-1	577216	543094	0	0	0	0	0	0	0	0	0	0	0	0	0	0
2008-01-18	130	17:12:00	-1	577308	543058				0								0		0
2008-01-18	131	17:16:00	-1	577414	543002	1	2	0	3	1	0	0	0	0	0	0	0.46657	0	26.7581
2008-01-19	132	08:20:00	1	577479	542944	0	0	0	0	1	0	0	0	0	0	0	0.00398227	0	0.228386
2008-01-19	133	08:31:00	1	577563	542917	0	0	0	0	1	0	0	0	0	0	0	0.00398227	0	0.228386
2008-01-19	134	08:41:00	1	577648	542872	0	0	0	0	2	0	0	0	0	0	0	0.00796454	0	0.456771
2008-01-19	135	08:52:00	1	577746	542852	0	0	0	0	5	1	3	0	0	0	0	0.0199114	1 ?	1.14193
2008-01-19	136	09:03:00	2	577833	542810	0	0	0	0	15	0	0	0	0	1 britle star	0.6	0.0597341	0	3.42578
2008-01-19	137	09:12:00	2	577926	542782	0	0	0	0	33	0	0	0	0	0	0	0.131415	0	7.53673
2008-01-19	138	09:30:00	2	578013	542744	0	0	0	0	19	0	0	0	0	0	0	0.0756632	0	4.33933
2008-01-19	139	09:41:00	2	578097	542725	0	0	0	0	39	0	0	0	0	1 britle star	0.5	0.155309	0	8.90704
2008-01-19	140	09:57:00	3	578182	542700	15	925	6	946	1	0	0	0	0	0	0	210.704	0	12084
2008-01-19	141	10:02:00	3	578258	542668	0	0	0	0	0	0	0	0	0	0	0	0	0	0
2008-01-19	142	10:10:00	3	578348	542621	0	0	0	0	2	0	0	0	0	0	0	0.00796454	0	0.456771
2008-01-19	143	10:17:00	3	578440	542577	0	0	0	0	1	0	0	0	0	0	0	0.00398227	0	0.228386
2008-01-19	144	10:24:00	3	578545	542536	0	0	0	0	1	0	0	0	0	0	0	0.00398227	0	0.228386
2008-01-19	145	10:31:00	3	578634	542507	0	0	0	0	0	0	0	0	0	0	0	0	0	0
2008-01-19	146	10:34:00	3	578733	542485	0	0	0	0	0	0	0	0	0	0	0	0	0	0
2008-01-19	147	10:39:00	3	578817	542437	0	0	0	0	0	1	-	0	0	0	0	0	1 FY	0
2008-01-19	148	10:43:00	3	578914	542392	0	0	0	0	2	0	0	0	0	0	0	0.00796454	0	0.456771
2008-01-19	149	10:49:00	3	579004	542360	0	0	0	0	0	1	1.7	0	0	0	0	0	1 RY	0
2008-01-19	150	10:53:00	3	579096	542308	0	0	0	0	0	1	1.2	0	0	0	0	0	1 FR	0
2008-01-19	151	10:59:00	4	579163	542282	0	0	0	0	0	0	0	0	0	0	0	0	0	0
2008-01-19	152	11:02:00	4	579257	542252	0	0	0	0	0	0	0	0	0	0	0	0	0	0
2008-01-19	153	11:17:00	4	579366	542216	0	0	0	0	0	0	0	0	0	0	0	0	0	0
2008-01-19	154	11:25:00	4	579529	542134	0	0	0	0	0	1	1.6	0	0	0	0	0	1 TY	0
	155					0	0	0	0	0	1	0.9	1	0.8	0	0	0	1 RY	0
2008-01-19	156	11:30:00	4	579613	542092	0	0	0	0	0	0	0	1	1.2	0	0	0	0	0
2008-01-19	157	11:35:00	4	579695	542062	0	0	0	0	0	1	3.3	0	0	0	0	0	1 RY	0
2008-01-19	158	11:39:00	4	579788	542018	0	1	0	1	0	0	0	0	0	0	0	0.22615	0	12.9698
2008-01-19	159	11:44:00	4	579886	541965	0	0	0	0	0	0	0	0	0	0	0	0	0	0
2008-01-19	160	11:49:00	4	579971	541937	0	0	0	0	0	0	0	0	0	0	0	0	0	0
2008-01-19	161	11:52:00	4	580072	541892	0	1	0	1	0	0	0	0	0	0	0	0.22615	0	12.9698
2008-01-19	162	11:57:00	5	580130	541835	0	0	0	0	0	0	0	0	0	0	0	0	0	0
2008-01-19	163	12:02:00	5	580214	541792	0	0	0	0	0	0	0	0	0	0	0	0	0	0
2008-01-19	164	12:06:00	5	580288	541737	0	0	0	0	2	0	0	1	1.2	0	0	0.00796454	0	0.456771
2008-01-19	165	12:12:00	5	580293	541744	0	0	0	0	0	5	> 1	0	0	0	0	0	5 ?	0
2008-01-19	166	12:17:00	5	580452	541632	0	0	0	0	0	2	1.1, 0.9	0	0	0	0	0	2 RY	0
2008-01-19	167	12:38:00	5	580362	541699	0	0	0	0	0	0	0	0	0	0	0	0	0	0
2008-01-19	168	12:45:00	5	580277	541747				0								0		0
2008-01-19	169	12:53:00	5	580208	541804	2	0	0	2	0	0	0	0	0	0	0	0.0205777	0	1.18014
2008-01-19	170	13:00:00	6	580131	541851				0								0		0
2008-01-19	171	13:04:00	6	580051	541898	0	1	0	1	0	0	0	0	0	0	0	0.22615	0	12.9698
2008-01-19	172	13:10:00	6	579972	541943	0	0	0	0	0	2	2,2	0	0	0	0	0	2 ?	0
2008-01-19	173	13:15:00	6	579888	541979	1	0	0	1	0	0	0	0	0	0	0	0.0102888	0	0.59007
2008-01-19	174	13:24:00	6	579799	542025	3	2	0	5	0	1	1.4	0	0	0	0	0.483166	1 RY	27.7098
2008-01-19	175	13:29:00	6	579701	542055	0	1	0	1	0	0	0	0	0	0	0	0.22615	0	12.9698
2008-01-19	176	13:47:00	6	579632	542100	0	0	0	0	0	0	0	0	0	0	0	0	0	0
2008-01-19	177	13:52:00	6	579555	542148	0	0	0	0	0	0	0	0	0	0	0	0	0	0
2008-01-19	178	13:56:00	-6	579461	542183	0	0	0	0	0	0	0	0	0	0	0	0	0	0
2008-01-19	179	14:00:00	-6	579372	542224	0	0	0	0	0	0	0	0	0	0	0	0	0	0
2008-01-19	181	14:05:00	-6	579280	542257				0								0		0
2008-01-19	182	14:15:00	-6	579190	542297	0	0	0	0	0	0	0	0	0	0	0	0	0	0
2008-01-19	183	14:21:00	-6	579096	542341	16	400	0	416	0	0	0	0	0	0	0	90.6245	0	5197.37
2008-01-19	184	14:27:00	-6	579016	542371	0	2	0	2	0	0	0	0	0	0	0	0.452299	0	25.9396
2008-01-19	185	14:31:00	-6	578935	542407	0	1	0	1	0	0	0	0	0	0	0	0.22615	0	12.9698
2008-01-19	186	14:42:00	-6	578848	542435	5	17	2	24	0	0	0	0	0	0	0	4.34829	0	249.377
2008-01-19	187	14:49:00	-6	578762	542485	5	82	5	92	0	0	0	0	0	0	0	19.7265	0	1131.32
2008-01-19	188	14:55:00	-5	578680	542524	0	2	0	2	0	2	2,2	0	0	0	0	0.452299	2 ?	25.9396
2008-01-19	189	14:59:00	-5	578593	542562	0	2	2	4	0	0	0	0	0	0	0	0.904598	0	51.8793
2008-01-19	190	15:05:00	-5	578500	542594	2	810	21	833	0	0	0	0	0	0	0	187.951	0	10779.1
2008-01-19	191	15:10:00	-5	578414	542632				0								0		0
2008-01-19	192	15:15:00	-5	578324	542671	0	105	0	105	0	0	0	0	0	0	0	23.7457	0	1361.83
2008-01-19	193	15:21:00	-5	578238	542701	0	0	0	0	0	0	0	0	0	0	0	0	0	0
2008-01-19	194	15:34:00	-5	578154	542735	0	34	0	34	0	0	0	0	0	0	0	7.68909	0	440.974
2008-01-19	195	15:30:00	-5	578068	542770	2	0	0	2	0	0	0	0	0	0	0	0.0205777	0	1.18014
2008-01-19	196	15:34:00	-5	577988	542804	0	26	5	31	0	0	0	0	0	0	0	7.01064	0	402.064
2008-01-19	197	15:39:00	-5	577902	542829	0	2	0	2	0	0	0	0	0	0	0	0.452299	0	25.9396
2008-01-19	198	15:46:00	-5	577817	542864	0	1	0	1	0	0	0	0	0	1 britle star	0.7	0.22615	0	12.9698
2008-01-19	199	15:54:00	-5	577727	542894	0	1	1	2	0	0	0	0	0	1 britle star	0.8	0.452299	0	25.9396
2008-01-19	200	16:00:00	-4	577644	542933	0	0	0	0	0	1	-	0	0	0	0	0	1 ?	0
2008-01-19	201	16:07:00	-4	577559	542972				0								0		0
2008-01-19	202	16:13:00	-4	577468	543008	0	0	0	0	0	1	-	0	0	0	0	0	1 ?	0
2008-01-19	202	16:16:00	-4	577465	543008				0								0		0
2008-01-19	203	16:21:00	-4	577373	543041				0								0		0
2008-01-19	204	16:29:00	-4	577300	543079	0	0	0	0	0	2	-	0	0	1 britle star	0.4	0	2 ?	0
2008-01-21	205	08:16:00	-2	577187	543061	0	0	0	0	41	0	0	0	0	0	0	0.163273	0	9.36381
2008-01-21	206	08:27:00	-2	577100	543100	0	0	0	0	62	0	0	0	0	0	0	0.246901	0	14.1599
2008-01-21	207	08:46:00	-1	577002	543126	0	0	0	0	108	0	0	0	0	0	0	0.430085	0	24.6656
2008-01-21	208	09:08:00	-1	576903	543163	0	1	0	1	50	0	0	0	0	0	0	0.425263	0	24.3891
2008-01-21	209	09:19:00	-1	576812	543205	0	0	0	0	278	0	0	0	0	0	0	1.10707	0	63.4912
2008-01-21	210	10:15:00	1	576713	543240	0	250	8	258	20	0	0	0	0	0	0	58.4262	0	3350.78
2008-01-21	211	10:23:00	1	576612	543270	1	1	0	2	102	0	0	0	0	0	0	0.64263	0	36.8552
2008-01-21	212	10:46:00	2	576530	543313	0	0	0	0	94	0	0	0	0	0	0	0.374333	0	21.4682
2008-01-21	213	11:04:00	2	576468	543347	18	309	4	331	36	0	0	0	0	0	0	71.1134	0	4078.4
2008-01-21	214	11:16:00	2	576363	543394	20	512	6	538	2	0	0	0	0	0	0	117.359	0	6730.62
2008-01-21	215	11:24:00	2	576292	543432	12	143	0	155	16	0	0	0	0	0	0	32.5266	0	1865.42
2008-01-21	216	11:39:00	3	576013	543461	5	2	0	7	127	0	0	0	0	0	0	1.00949	0	57.895
2008-01-21	217	11:59:00	3	576130	543514	24	177	6	207	1	0	0	0	0	0	0	41.6363	0	2387.87
2008-01-21	218	12:32:00	3	576043	543565	0	4	1	5	4	0	0	0	0	0	0	1.14668	0	65.7626
2008-01-21	219	12:38:00	4	575961	543618	1	5	0	6	2	1	2.9	0	0	1 britle star	0.9	1.149	1 RY	65.8959
2008-01-21	220	12:45:00	4	575878	543659	0	18	1	19	0	1	6.7	0	0	0	0	4.29684	1 TY	246.426
2008-01-21	221	12:52:00	4	575795	543695	0	294	14	308	0	2	2.1, 3.3	0	0	0	0	69.6541	2 FR	3994.7
2008-01-21	222	13:11:00	4	575706	543731	5	10	0	15	0	1	10.4	0	0	0	0	2.31294	1 RY	132.648
2008-01-21	223	13:16:00	4	575625	543777	0	4	0	4	0	0	0	0	0	0	0	0.904598	0	51.8793
2008-01-21	224	13:23:00	4	575537	543819	0	0	0	0	0	1	2.8	0	0	0	0	0	1TR	0
2008-01-21	225	13:28:00	4	575454	543856	0	1	0	1	0	0	0	0	0	0	0	0.22615	0	12.9698
2008-01-21	226	13:32:00	4	575364	543888	1	3	0	4	0	0	0	0	0	0	0	0.688738	0	39.4995
2008-01-21	227	13:37:00	4	575273	543927	0	0	0	0	0	4	7, 4.7, 1.3, 1.7	0	0	0	0	0	2 RY, 2 FY	0
2008-01-21	228	13:42:00	5	575185	543959	52	20	0	72	0	3	4, 5.1, 5.2	0	0	0	0	5.05801	2 TY, 1 RY	290.08
2008-01-21	229	13:49:00	5	575185	543959	0	1	0	1	0	0	0	0	0	0	0	0.22615	0	12.9698
2008-01-21	230	13:54:00	5	575002	544035	0	3	0	3	0	0	0	1	2.4	0	0	0.678449	0	38.9094
2008-01-21	231	14:01:00	5	574914	544076	0	1	0	1	0	1	8.5	0	0	1 britle star	0.5	0.22615	1 RY	12.9698
2008-01-21	232	14:06:00	5	574848	544102	0	0	0	0	0	1	> 1	0	0	0	0	0	1 ?	0
2008-01-21	233	14:16:00	5	574756	544147	0	0	0	0	0	0	0	0	0	0	0	0	0	0
2008-01-21	234	14:22:00	5	574669	544174	1	3	0	4	1	0	0	1	2.1	0	0	0.69272	0	39.7279
2008-01-21	235	14:37:00	5	574567	544213	0	3	0	3	0	2	5.4, 6	0	0	0	0	0.678449	2 RY	38.9094
2008-01-21	236	14:45:00	6	574471	544258	21	4	0	25	0	0	0	1	0.8	0	0	1.12066	0	64.2707
2008-01-21	237	14:50:00	6	574395	544289	0	0	0	0	0	0	0	0	0	0	0	0	0	0
2008-01-21	238	14:56:00	6	574301	544313	0	0	0	0	0	1	4.8	0	0	0	0	0	1 RY	0
2008-01-21	239	15:01:00	6	574207	544342	0	1	0	1	0	0	0	0	0	0	0	0.22615	0	12.9698
2008-01-21	240	15:06:00	6	574110	544369	0	0	0	0	0	1	2	0	0	0	0	0	1 FR	0
2008-01-21	241	15:12:00	6	574025	544394				0								0		0
2008-01-21	242	15:17:00	6	573938	544428	1	3	0	4	0	0	0	0	0	0	0	0.688738	0	39.4995
2008-01-21	243	15:24:00	6	573859	544469	0	4	0	4	0	2	11.1, 8.2	0	0	0	0	0.904598	2 RY	51.8793
2008-01-21	244	15:29:00	6	573769	544513	0	0	0	0	0	1	4	1	0.8	0	0	0	1 RY	0
2008-01-21	245	15:35:00	6	573677	544550	0	1	1	2	0	0	0	0	0	0	0	0.452299	0	25.9396
2008-01-21	246	15:40:00	-6	573594	544584				0								0		0
2008-01-21	247	15:44:00	-6	573512	544609	0	0	0	0	0	1	3.6	0	0	0	0	0	1 RY	0
2008-01-21	248	15:48:00	-6	573427	544655	0	0	0	0	0	0	0	0	0	0	0	0	0	0
2008-01-21	249	15:53:00	-6	573336	544667	0	0	0	0	0	1	2.4	0	0	0	0	0	1 RY	0
	249a					0	0	0	0	0	1	3.1	0	0	0	0	0	1 TR	0
2008-01-21	250	16:01:00	-6	573240	544703	0	0	0	0	0	2	8, 6	0	0	0	0	0	2 RY	0
2008-01-21	251	16:05:00	-6	573154	544732	0	4	0	4	0	2	8.1, 10	0	0	0	0	0.904598	2 RY	51.8793
2008-01-21	252	16:11:00	-6	573065	544760	0	0	0	0	0	1	7.8	0	0	0	0	0	1 RY	0
2008-01-21	253	16:18:00	-6	572967	544787	0	6	0	6	0	0	0	0	0	0	0	1.3569	0	77.8189
2008-01-21	254	16:24:00	-6	572883	544824	0	2	0	2	0	3	9.1, 8.6, 9.3	0	0	0	0	0.452299	3 RY	25.9396
2008-01-21	255	16:29:00	-6	572807	544841	0	6	0	6	0	0	0	0	0	0	0	1.3569	0	77.8189
2008-01-21	256	16:43:00	-5	572712	544872	0	2	0	2	0	3	8.4, 2.6, 2.1	0	0	0	0	0.452299	1 RY, 1 FR, 1 FY	25.9396
2008-01-21	257	16:47:00	-5	572623	544905	0	2	0	2	0	1	8.4	0	0	0	0	0.452299	1 RY	25.9396
2008-01-21	258	16:52:00	-5	572527	544930	0	0	0	0	0	1	10.8	0	0	0	0	0	1 RY	0
2008-01-21	259	16:57:00	-5	572448	544949	0	3	1	4	0	0	0	0	0	0	0	0.904598	0	51.8793
2008-01-21	260	17:02:00	-5	572358	544977	0	4	0	4	0	1	3.9	1	1.5	0	0	0.904598	1 TY	51.8793
2008-01-21	261	17:08:00	-5	572265	545011	0	5	0	5	0	0	0	0	0	0	0	1.13075	0	64.8491
2008-01-21	262	17:14:00	-5	572174	545040	0	4	0	4	0	0	0	1	1	0	0	0.904598	0	51.8793
2008-01-21	263	17:19:00	-5	572087	545072	0	5	0	5	0	2	7.1, 1.1	1	1.4	0	0	1.13075	2 RY	64.8491
2008-01-21	264	17:24:00	-5	571994	545110	0	4	0	4	0	1	6.5	0	0	0	0	0.904598	1 TY	51.8793
2008-01-21	265	17:29:00	-5	571903	545136	4	326	20	350	1	0	0	0	0	0	0	78.2929	0	4490.14
2008-01-21	266	17:36:00	-5	571817	545169	0	711	9	720	0	0	0	0	0	0	0	162.828	0	9338.27
2008-01-21	267	17:42:00	-4	571717	545191	0	30	0	30	0	1	4	1	1.3	0	0	6.78449	1 TR	389.094
2008-01-21	268	17:48:00	-4	571641	545218	0	1169	20	1189	1	0	0	0	0	0	0	268.896	0	15421.3
2008-01-22	269	08:02:00	-3	571503	545215	0	145	27	172	4	0	0	0	0	0	0	38.9137	0	2231.72
2008-01-22	270	08:20:00	-2	571407	545233	20	42	19	81	0	0	0	0	0	0	0	14.0009	0	802.96
2008-01-22	271	08:34:00	-2	571314	545266	0	2	1	3	0	0	0	0	0	0	0	0.678449	0	38.9094
2008-01-22	272	08:43:00	-2	571208	545282	0	2	0	2	2	0	0	0	0	0	0	0.460264	0	26.3964
2008-01-22	273	08:49:00	-2	571131	545318	0	2	0	2	6	0	0	0	0	1 crab	1.5	0.476193	0	27.3099
2008-01-22	274	08:58:00	-2	571031	545346	0	1	0	1	7	0	0	1	0.6	0	0	0.254025	0	14.5685
2008-01-22	275	09:08:00	-2	570935	545381	0	0	0	0	14	0	0	0	0	0	0	0.0557518	0	3.1974
2008-01-22	276	09:17:00	-2	570845	545402	2	0	0	2	7	0	0	0	0	0	0	0.0484536	0	2.77884
2008-01-22	277	09:25:00	-1	570754	545437	5	232	0	237	15	0	0	0	0	0	0	52.5779	0	3015.37
2008-01-22	278	09:41:00	-1	570657	545461	0	5	0	5	12	1	2.5	0	0	0	0	1.17854	1 ?	67.5897
2008-01-22	279	09:49:00	-1	570582	545491	501	12	0	513	6	0	0	0	0	0	0	7.89239	0	452.633
2008-01-22	280	09:59:00	-1	570484	545524	30	53	0	83	10	0	0	1	-	0	0	12.3344	0	707.386
2008-01-22	281	10:09:00	-1	570403	545554	0	1	0	1	9	0	0	1	1.4	0	0	0.26199	0	15.0253
2008-01-22	282	10:19:00	-1	570315	545580	0	1	0	1	28	0	0	1	0.8	0	0	0.337653	0	19.3646
2008-01-22	283	10:34:00	1	570212	545626	0	1	0	1	15	0	0	0	0	0	0	0.285884	0	16.3956
2008-01-22	284	10:44:00	1	570126	545662	1	38	4	43	8	0	0	0	0	0	0	9.54043	0	547.149
2008-01-22	285	11:01:00	1	570035	545686	2	249	19	270	0	0	0	0	0	0	0	60.6287	0	3477.09
2008-01-22	286	11:18:00	1	569948	545715	0	831	12	843	7	0	0	0	0	0	0	190.672	0	10935.2
2008-01-22	287	11:23:00	2	569857	545736	2	5	0	7	1	0	0	0	0	0	0	1.15531	0	66.2576
2008-01-22	288	11:31:00	2	569774	545763	0	1	0	1	3	0	0	0	0	0	0	0.238096	0	13.655
2008-01-22	289	11:39:00	2	569694	545796	1	3	0	4	0	0	0	0	0	0	0	0.688738	0	39.4995
2008-01-22	290	11:45:00	2	569604	545817	0	0	0	0	0	0	0	0	0	1 crab	1.5	0	0	0
2008-01-22	291	12:13:00	2	569506	545838	2	14	2	18	0	0	0	0	0	0	0	3.63897	0	208.697
2008-01-22	292	12:19:00	2	569418	545872	1	125	13	139	2	0	0	0	0	0	0	31.2269	0	1790.88
2008-01-22	293	12:34:00	3	569325	545892	0	422	93	515	5	0	0	0	0	0	0	116.487	0	6680.6
2008-01-22	294	12:52:00	3	569243	545937	0	7	0	7	0	0	0	0	0	0	0	1.58305	0	90.7887
2008-01-22	295	12:59:00	3	569129	545968	0	1	0	1	2	0	0	0	0	0	0	0.234114	0	13.4266
2008-01-22	296	13:05:00	3	569046	546011	0	5	68	73	1	0	0	0	0	0	0	16.5129	0	947.025
2008-01-22	297	13:16:00	3	568959	546053	0	0	0	0	0	0	0	1	1.1	0	0	0	0	0
2008-01-22	298	13:20:00	4	568874	546078	0	8	0	8	0	0	0	0	0	0	0	1.8092	0	103.759
2008-01-22	299	13:26:00	4	568792	546118	0	45	31	76	0	0	0	0	0	0	0	17.1874	0	985.706
2008-01-22	300	13:35:00	4	568698	546154				0								0		0
2008-01-22	301	13:41:00	4	568619	546192	0	5	0	5	0	1	1.4	0	0	0	0	1.13075	1 RY	64.8491
2008-01-22	302	13:46:00	4	568529	546241	0	18	6	24	0	1	3.4	0	0	0	0	5.42759	1 RY	311.276
2008-01-22	303	13:52:00	4	568489	546300	0	13	0	13	0	0	0	0	0	0	0	2.93994	0	168.608
2008-01-22	304	13:59:00	4	568557	546220	0	1	0	1	5	0	0	0	0	0	0	0.246061	0	14.1117
2008-01-22	305	14:10:00	4	568644	546186	0	0	0	0	0	1	7.2	1	1.3	0	0	0	1 RY	0
2008-01-22	306	14:15:00	4	568728	546147	0	10	6	16	0	0	0	1	1.4	0	0	3.61839	0	207.517
2008-01-22	307	14:20:00	5	568811	546112	0	1	1	2	0	0	0	1	1.9	0	0	0.452299	0	25.9396
2008-01-22	308	14:25:00	5	568902	546091	0	2	0	2	1	0	0	0	0	0	0	0.456281	0	26.168
2008-01-22	309	14:29:00	5	568987	546054	0	143	56	199	0	0	0	0	0	0	0	45.0038	0	2580.99
2008-01-22	310	14:33:00	5	569074	546031	0	2	2	4	0	0	0	0	0	0	0	0.904598	0	51.8793
2008-01-22	311	14:36:00	5	569164	545991	0	1	1	2	0	0	0	0	0	0	0	0.452299	0	25.9396
2008-01-22	312	14:43:00	5	569262	545968	0	3	0	3	0	1	1.2	0	0	0	0	0.678449	1 RY	38.9094
2008-01-22	313	14:47:00	5	569353	545931	0	1	1	2	0	1	6.1	0	0	0	0	0.452299	1 RY	25.9396
2008-01-22	314	14:51:00	5	569443	545900	0	2	0	2	0	0	0	0	0	0	0	0.452299	0	25.9396
2008-01-22	315	14:59:00	5	569552	545876	0	3	0	3	0	1	9.1	0	0	0	0	0.678449	1 RY	38.9094
2008-01-22	316	15:07:00	5	569640	545862	0	1	0	1	0	0	0	0	0	0	0	0.22615	0	12.9698
2008-01-22	317	15:11:00	5	569727	545845	0	1	0	1	0	0	0	1	1.3	0	0	0.22615	0	12.9698
2008-01-22	318	15:16:00	5	569825	545818	0	3	0	3	0	0	0	0	0	0	0	0.678449	0	38.9094
2008-01-22	319	15:21:00	6	569919	545793	0	4	0	4	0	0	0	0	0	0	0	0.904598	0	51.8793
2008-01-22	320	15:26:00	6	570013	545761	0	0	0	0	0	1	4.1	0	0	0	0	0	1 RY	0
2008-01-22	321	15:32:00	6	570113	545735	0	2	0	2	0	0	0	0	0	0	0	0.452299	0	25.9396
2008-01-22	322	15:36:00	6	570209	545703	0	6	3	9	0	0	0	1	1.4	0	0	2.03535	0	116.728
2008-01-22	327	15:41:00	6	570313	545670	0	2	0	2	0	1	3.2	0	0	0	0	0.452299	1 RY	25.9396
2008-01-22	323	15:45:00	6	570395	545626	0	1	0	1	0	1	3.3	0	0	0	0	0.22615	1 TR	12.9698
2008-01-22	324	15:51:00	6	570489	545603	0	1	0	1	0	0	0	0	0	0	0	0.22615	0	12.9698
2008-01-22	325	15:55:00	6	570576	545580	0	4	0	4	0	0	0	0	0	0	0	0.904598	0	51.8793
2008-01-22	326	15:08:00	6	570663	545549	0	3	0	3	0	0	0	1	1.9	0	0	0.678449	0	38.9094
2008-01-22	328	16:07:00	6	570749	545516	2	3	0	5	0	0	0	2	1.8, 0.6	0	0	0.699026	0	40.0896
2008-01-22	329	16:12:00	6	570837	545490	0	0	0	0	0	1	5.1	0	0	0	0	0	1 TY	0
2008-01-22	330	16:17:00	6	570925	545454	0	1	0	1	0	0	0	0	0	0	0	0.22615	0	12.9698
2008-01-22	331	16:20:00	-6	571022	545426	0	4	0	4	0	0	0	0	0	0	0	0.904598	0	51.8793
2008-01-22	332	16:25:00	-6	571108	545395	0	2	0	2	0	1	5	0	0	0	0	0.452299	1 RY	25.9396
2008-01-22	333	16:30:00	-6	571191	545396	0	0	0	0	0	1	2.1	0	0	0	0	0	1 TY	0
2008-01-23	334	08:09:00	-3	571468	545235				0								0		0
2008-01-23	335	08:35:00	-3	571558	545190	3	229	3	235	2	0	0	0	0	0	0	52.5055	0	3011.22
2008-01-23	336	08:57:00	-3	571641	545158	1	66	0	67	2	0	0	0	0	0	0	14.9441	0	857.055
2008-01-23	337	09:05:00	-2	571728	545122	0	0	0	0	1	0	0	0	0	0	0	0.00398227	0	0.228386
2008-01-23	338	09:12:00	-2	571814	545107				0								0		0
2008-01-23	339	09:19:00	-2	571886	545082	0	1	0	1	0	0	0	4	1,1,2.3,2.5	0	0	0.22615	0	12.9698
2008-01-23	340	09:25:00	-2	571967	545051				0								0		0
2008-01-23	342	09:33:00	-2	572059	545013	0	31	0	31	0	0	0	0	0	0	0	7.01064	0	402.064
2008-01-23	341	09:41:00	-2	572136	544982	260	43	12	315	2	0	0	0	0	0	0	15.1213	0	867.215
2008-01-23	343	09:49:00	-2	572223	544963	144	58	18	220	0	0	0	0	0	0	0	18.669	0	1070.68
2008-01-23	344	09:58:00	-2	572301	544920	0	0	0	0	31	0	0	0	0	0	0	0.12345	0	7.07995
2008-01-23	345	10:12:00	-1	572383	544888	0	0	0	0	15	1	3.9	0	0	0	0	0.0597341	1 TY	3.42578
2008-01-23	346	10:20:00	-1	572470	544854	0	0	0	0	7	0	0	0	0	0	0	0.0278759	0	1.5987
2008-01-23	347	10:27:00	-1	572552	544841	0	1	0	1	21	0	0	1	0.9	0	0	0.309777	0	17.7659
2008-01-23	348	10:36:00	-1	572656	544806	0	1	0	1	6	0	0	1	1.7	0	0	0.250043	0	14.3401
2008-01-23	349	10:53:00	-1	572728	544719	0	0	0	0	7	0	0	0	0	0	0	0.0278759	0	1.5987
2008-01-23	350	11:03:00	1	572824	544762	0	0	0	0	0	0	0	0	0	1 crab	2	0	0	0
2008-01-23	351	11:13:00	1	572920	544724	1	0	1	2	4	2	-	0	0	0	0	0.252368	2 ?	14.4734
2008-01-23	352					0	0	0	0	5	0	0	0	0	0	0	0.0199114	0	1.14193
2008-01-23	353	11:19:00	1	573020	544693	0	0	0	0	6	0	0	0	0	0	0	0.0238936	0	1.37031
2008-01-23	355	11:38:00	1	573176	544641	0	0	0	0	3	0	0	0	0	0	0	0.0119468	0	0.685157
2008-01-23	356	11:52:00	1	573262	544614	0	0	0	0	13	0	0	0	0	0	0	0.0517695	0	2.96901
2008-01-23	357	12:40:00	1	573347	544611	2	110	21	133	0	0	0	0	0	0	0	29.6462	0	1700.23
2008-01-23	358	13:00:00	2	573426	544586	20	2	0	22	16	0	0	0	0	0	0	0.721792	0	41.3952
2008-01-23	359	13:12:00	2	573505	544554	33	124	9	166	29	0	0	0	0	0	0	30.5329	0	1751.08
2008-01-23	360	13:18:00	2	573600	544574	0	2	0	2	0	0	0	0	0	0	0	0.452299	0	25.9396
2008-01-23	361	13:24:00	2	573679	544506	0	263	5	268	2	0	0	0	0	0	0	60.6161	0	3476.37
2008-01-23	362	13:29:00	2	573764	544468	1	146	0	147	9	0	0	0	0	0	0	33.064	0	1896.24
2008-01-23	363	13:47:00	2	573855	544449	0	2	0	2	0	0	0	0	0	0	0	0.452299	0	25.9396
2008-01-23	364	13:53:00	2	573928	544431	0	0	0	0	9	1	3.6	0	0	0	0	0.0358404	1 ?	2.05547
2008-01-23	365	14:05:00	3	573933	544367	0	1	0	1	0	2	-	3	0.9,0.8,1.8	0	0	0.22615	2 ?	12.9698
2008-01-23	366	14:10:00	3	574020	544344	0	8	0	8	1	0	0	0	0	0	0	1.81318	0	103.987
2008-01-23	367	14:18:00	3	574210	544323	0	0	0	0	0	1	1.2	0	0	0	0	0	1 RY	0
2008-01-23	368	14:26:00	3	574291	544302	0	13	1	14	0	0	0	0	0	0	0	3.16609	0	181.577
2008-01-23	369	14:32:00	3	574377	544267	0	0	0	0	0	2	-	0	0	0	0	0	2 FY	0
2008-01-23	370	14:38:00	3	574453	544238	0	2	0	2	0	2	-	0	0	0	0	0.452299	1 RY, 1TY	25.9396
2008-01-23	371	14:45:00	3	574562	544204	0	2	0	2	0	2	4,2.3	1	1.1	0	0	0.452299	2 RY	25.9396
2008-01-23	372	14:51:00	3	574657	544170	0	1	0	1	0	2	-	0	0	0	0	0.22615	2 ?	12.9698
2008-01-23	373	14:59:00	4	574744	544148	1	1	0	2	0	1	6.6	0	0	0	0	0.236438	1 RY	13.5599
2008-01-23	374	15:03:00	4	574817	544126	0	1	0	1	0	1	7	0	0	0	0	0.22615	1 RY	12.9698
2008-01-23	375	15:07:00	4	574905	544095	0	0	0	0	0	1	-	0	0	0	0	0	1 ?	0
2008-01-23	376	15:10:00	4	574982	544048	0	0	0	0	0	2	3.5, 1	0	0	0	0	0	2 RY	0
2008-01-23	377	15:15:00	4	575064	543996	0	0	0	0	0	2	-	0	0	0	0	0	2 TR	0
2008-01-23	378	15:18:00	4	575148	543977	0	0	0	0	0	1	5	0	0	0	0	0	1 TR	0
2008-01-23	379	15:22:00	4	575239	543944	0	1	0	1	0	0	0	0	0	0	0	0.22615	0	12.9698
2008-01-23	380	15:25:00	4	575323	543918	1	1	0	2	0	0	0	0	0	0	0	0.236438	0	13.5599
2008-01-23	381	15:29:00	4	575406	543896	0	1	0	1	0	1	3.1	0	0	0	0	0.22615	1 RY	12.9698
2008-01-23	382	15:33:00	4	575489	543857	0	2	1	3	0	0	0	0	0	0	0	0.678449	0	38.9094
2008-01-23	383	15:38:00	4	575568	543818	1	1	0	2	0	1	2	0	0	0	0	0.236438	1 TR	13.5599
2008-01-23	384	15:44:00	4	575668	543779	0	2	0	2	0	0	0	0	0	0	0	0.452299	0	25.9396
2008-01-23	385	15:48:00	4	575787	543719	12	0	0	12	0	0	0	0	0	0	0	0.123466	0	7.08085
2008-01-23	386	15:52:00	4	575875	543694	0	1	0	1	0	0	0	0	0	0	0	0.22615	0	12.9698
2008-01-23	387	15:57:00	4	575967	543649				0								0		0
2008-01-23	388	16:01:00	5	576046	543598	0	1	0	1	0	0	0	0	0	0	0	0.22615	0	12.9698
2008-01-23	389	16:05:00	5	576130	543558	0	5	1	6	0	1	4	0	0	0	0	1.3569	1 RY	77.8189
2008-01-23	390	16:09:00	5	576211	543530	0	0	0	0	0	1	1.1, 0.9	0	0	0	0	0	1 TR	0
2008-01-23	391	16:13:00	5	576292	543491	0	1	0	1	0	0	0	0	0	0	0	0.22615	0	12.9698
2008-01-23	392	16:19:00	5	576386	543453	0	0	0	0	0	2	4, 3.8	0	0	0	0	0	1 TR, 1TY	0
2008-01-23	393	16:22:00	5	576469	543419	0	0	0	0	0	2	-	0	0	0	0	0	2 RY	0
2008-01-23	394	16:27:00	5	576556	543389				0								0		0
2008-01-23	395	16:30:00	5	576636	543358				0								0		0
2008-01-23	396	16:34:00	5	576725	543325	0	0	0	0	0	1	1.5	0	0	0	0	0	1 RY	0
2008-01-23	397	16:38:00	5	576807	543287				0								0		0
2008-01-23	398	16:42:00	5	576892	543256	0	3	1	4	0	0	0	0	0	0	0	0.904598	0	51.8793
2008-01-23	399	16:45:00	5	576989	543223	0	0	1	1	0	0	0	0	0	0	0	0.22615	0	12.9698
2008-01-23	400	16:52:00	5	577089	543177				0								0		0
2008-01-23	401	16:57:00	5	577181	543146	0	3	0	3	0	0	0	2	1.3, 1	0	0	0.678449	0	38.9094
2008-01-23	402	17:01:00	6	577275	543116				0								0		0
2008-01-23	403	17:05:00	6	577356	543083				0								0		0
2008-01-23	404	17:08:00	6	577447	543044	0	0	0	0	0	1	> 1	0	0	0	0	0	1 ?	0
2008-01-23	405	17:13:00	6	577529	543009	0	2	0	2	0	0	0	0	0	0	0	0.452299	0	25.9396
2008-01-24	406	08:23:00	-4	580434	541627				0								0		0
2008-01-24	407	08:33:00	-4	580347	541672	0	0	0	0	5	0	0	0	0	0	0	0.0199114	0	1.14193
2008-01-24	408	08:40:00	-3	580268	541726				0								0		0
2008-01-24	409	08:49:00	-3	580189	541775	0	0	0	0	0	3	>1	0	0	0	0	0	3 RY	0
2008-01-24	410	08:57:00	-3	580114	541833	0	0	0	0	0	1	-	0	0	0	0	0	1 ?	0
2008-01-24	411	09:05:00	-3	580031	541874				0								0		0
2008-01-24	412	09:09:00	-3	579945	541911				0								0		0
2008-01-24	413	09:13:00	-3	579862	541956	0	0	0	0	0	0	0	0	0	1 isopod	1.3	0	0	0
2008-01-24	414	09:22:00	-3	579777	541993				0								0		0
2008-01-24	415	09:28:00	-3	579677	542034	0	0	0	0	0	0	0	0	0	0	0	0	0	0
2008-01-24	416	09:35:00	-3	579610	542072	0	0	0	0	2	0	0	0	0	0	0	0.00796454	0	0.456771
2008-01-24	417	09:40:00	-2	579523	542102	0	1	0	1	0	0	0	0	0	0	0	0.22615	0	12.9698
2008-01-24	418	09:45:00	-2	579438	542135	0	0	0	0	2	0	0	0	0	0	0	0.00796454	0	0.456771
2008-01-24	419	09:52:00	-2	579361	542178	0	0	0	0	10	0	0	0	0	0	0	0.0398227	0	2.28386
2008-01-24	420	10:01:00	-2	579267	542214	0	0	0	0	0	0	0	0	0	0	0	0	0	0
2008-01-24	421	10:07:00	-2	579181	542240	0	0	0	0	48	0	0	0	0	0	0	0.191149	0	10.9625
2008-01-24	422	10:18:00	-2	579104	542276	0	0	0	0	3	0	0	0	0	0	0	0.0119468	0	0.685157
2008-01-24	423	10:22:00	-2	579020	542305	0	0	0	0	4	0	0	0	0	0	0	0.0159291	0	0.913543
2008-01-24	424	10:29:00	-2	578937	542339	0	0	0	0	3	0	0	0	0	0	0	0.0119468	0	0.685157
2008-01-24	425	10:34:00	-2	578850	542379	3	0	0	3	4	0	0	0	0	0	0	0.0467956	0	2.68375
2008-01-24	426	10:41:00	-1	578767	542424	0	157	7	164	8	0	0	0	0	0	0	37.1204	0	2128.88
2008-01-24	427	10:52:00	-1	578681	542450	0	0	0	0	7	0	0	0	0	0	0	0.0278759	0	1.5987
2008-01-24	428	11:01:00	-1	578599	542477	0	1	0	1	1	0	0	0	0	0	0	0.230132	0	13.1982
2008-01-24	429	11:06:00	-1	578522	542521	0	0	0	0	21	0	0	0	0	0	0	0.0836277	0	4.7961
2008-01-24	431	11:18:00	-1	578521	542563	0	13	2	15	15	0	0	0	0	0	0	3.45198	0	197.973
2008-01-24	432	11:28:00	-1	578340	542581	0	0	0	0	6	0	0	0	0	0	0	0.0238936	0	1.37031
2008-01-24	433	11:33:00	-1	578300	542636	0	0	0	0	0	0	0	1	2.5	0	0	0	0	0
2008-01-24	434	11:41:00	1	578186	542667	10	510	95	615	1	0	0	0	0	0	0	136.927	0	7852.87
2008-01-24	435	11:48:00	1	578096	542697	0	0	0	0	117	0	0	0	0	0	0	0.465926	0	26.7211
2008-01-24	436	12:04:00	1	578013	542739	0	6	1	7	18	0	0	0	0	0	0	1.65473	0	94.8996
2008-01-24	437	12:12:00	1	577926	542774	0	0	0	0	45	0	0	0	0	0	0	0.179202	0	10.2774
2008-01-24	438	12:21:00	1	577847	542807	0	0	0	0	39	0	0	0	0	0	0	0.155309	0	8.90704
2008-01-24	439	12:48:00	2	577758	542840	0	1	0	1	27	1	1.1	0	0	0	0	0.333671	1 RY	19.1362
2008-01-24	440	12:55:00	2	577666	542867	0	0	0	0	17	0	0	0	0	0	0	0.0676986	0	3.88256
2008-01-24	441	13:00:00	2	577585	542906	0	0	0	0	23	0	0	0	0	0	0	0.0915922	0	5.25287
2008-01-24	442	13:08:00	2	577492	542947	0	0	0	0	18	0	0	0	0	0	0	0.0716809	0	4.11094
2008-01-24	443	13:13:00	2	577416	542995	3	105	13	121	31	0	0	0	0	0	0	26.84	0	1539.29
2008-01-24	444	13:17:00	2	577334	543028	0	1	0	1	36	0	0	0	0	0	0	0.369511	0	21.1917
2008-01-24	445	13:24:00	2	577266	543058	0	0	0	0	14	0	0	0	0	0	0	0.0557518	0	3.1974
2008-01-24	446	13:30:00	3	577331	543032	0	1	1	2	4	1	1.6	0	0	1 crab	0.6	0.468228	1 RY	26.8532
2008-01-24	447	13:33:00	3	577430	543017	0	0	0	0	4	0	0	0	0	0	0	0.0159291	0	0.913543
2008-01-24	448	13:37:00	3	577511	542959	2	95	17	114	10	0	0	0	0	0	0	25.3892	0	1456.08
2008-01-24	449	13:41:00	3	577585	542917	0	3	0	3	0	0	0	0	0	0	0	0.678449	0	38.9094
2008-01-24	450	13:44:00	3	577663	542880	0	0	1	1	1	0	0	0	0	0	0	0.230132	0	13.1982
2008-01-24	451	13:48:00	3	577759	542861	2	251	63	316	1	0	0	0	0	0	0	71.0355	0	4073.93
2008-01-24	452	13:57:00	3	577848	542832	1	5	0	6	0	0	0	0	0	0	0	1.14104	0	65.4391
2008-01-24	453	14:01:00	3	577930	542797	2	934	89	1025	1	0	0	0	0	0	0	231.376	0	13269.5
2008-01-24	454	14:06:00	3	578022	542779	0	294	57	351	1	0	0	0	0	0	0	79.3825	0	4552.63
2008-01-24	455	14:10:00	3	578106	542729	1	8	4	13	0	1	2.4	0	0	0	0	2.72408	1 TR	156.228
2008-01-24	456	14:15:00	3	578193	542699	1	81	11	93	0	0	0	1	1.2	0	0	20.8161	0	1193.81
2008-01-24	457	14:22:00	3	578281	542672	0	13	5	18	0	1	3.6	0	0	0	0	4.07069	1 TY	233.457
2008-01-24	458	14:27:00	3	578362	542631	1	2	0	3	0	1	1.1	0	0	0	0	0.462588	1 RY	26.5297
2008-01-24	459	14:30:00	3	578450	542600	1	63	1	65	0	0	0	0	0	0	0	14.4839	0	830.658
2008-01-24	460	14:34:00	3	578523	542568	0	1	1	2	0	0	0	0	0	0	0	0.452299	0	25.9396
2008-01-24	461	14:37:00	4	578602	542536	2	15	2	19	0	0	0	0	0	0	0	3.86512	0	221.667
2008-01-24	462	14:41:00	4	578683	542502	1	17	0	18	0	0	0	0	0	0	0	3.85483	0	221.077
2008-01-24	463	14:45:00	4	578765	542480				0								0		0
2008-01-24	464	14:49:00	4	578769	542486	0	1	0	1	0	1	1.7	0	0	0	0	0.22615	1 TR	12.9698
2008-01-24	465	14:54:00	4	578933	542395				0								0		0
2008-01-24	466	14:57:00	4	579019	542365	0	14	6	20	0	0	0	0	0	0	0	4.52299	0	259.396
2008-01-24	467	15:01:00	4	579104	542333	0	0	1	1	0	1	1.2	0	0	0	0	0.22615	1 TR	12.9698
2008-01-24	468	15:05:00	4	579187	542300	0	2	0	2	0	0	0	1	1.4	0	0	0.452299	0	25.9396
2008-01-24	469	15:09:00	4	579273	542259	0	3	0	3	0	2	3.8, 7.1	0	0	0	0	0.678449	2 RY	38.9094
2008-01-24	470	15:12:00	4	579354	542233	0	1	0	1	0	0	0	0	0	0	0	0.22615	0	12.9698
2008-01-24	471	15:15:00	4	579436	542192				0								0		0
2008-01-24	472	15:18:00	4	579532	542153	0	0	0	0	0	1	4.7	0	0	0	0	0	1 TR	0
2008-01-24	473	15:22:00	4	579613	542117				0								0		0
2008-01-24	474	15:25:00	4	579693	542076	3	0	0	3	0	0	0	0	0	0	0	0.0308665	0	1.77021
2008-01-24	475	15:35:00	4	579791	542033	2	0	0	2	0	0	0	0	0	0	0	0.0205777	0	1.18014
2008-01-24	476	15:38:00	5	579869	541993	1	0	0	1	0	0	0	0	0	0	0	0.0102888	0	0.59007
2008-01-24	477	15:42:00	5	579953	541954	0	1	0	1	0	2	1.7, 2.1	0	0	1 isopod	0.5	0.22615	2 RY	12.9698
2008-01-24	478	15:46:00	5	580032	541920				0								0		0
2008-01-24	479	15:48:00	5	580114	541866	0	0	0	0	0	2	-	0	0	0		0	2?	0
2008-01-24	480	15:53:00	5	580186	541823	0	0	0	0	0	3	-	0	0	0	0	0	3?	0
2008-01-24	481	15:59:00	5	580262	541770	0	0	0	0	0	2	-	0	0	0	0	0	2 ?	0
2008-01-24	482	16:05:00	5	580345	541724	0	0	0	0	0	2	>1	0	0	0	0	0	2 ?	0
2008-01-24	482	16:11:00	5	580420	541670				0								0		0
2008-01-25	483	08:35:00	-5	577166	543123				0								0		0
2008-01-25	484	08:38:00	-5	577082	543161	2	565	28	595	0	2	6,4	0	0	0	0	134.127	1 TR, 1RY	7692.28
2008-01-25	485	08:42:00	-4	576988	543185	2	15	1	18	1	1	-	0	0	0	0	3.64295	1 ?	208.926
2008-01-25	486	08:48:00	-4	576900	543218	2	435	22	459	0	0	0	0	0	0	0	103.371	0	5928.39
2008-01-25	487	08:52:00	-4	576809	543254	0	0	0	0	0	0	0	0	0	0	0	0	0	0
2008-01-25	488	08:57:00	-4	576728	543290	2	600	23	625	0	0	0	0	0	0	0	140.912	0	8081.37
2008-01-25	489	09:02:00	-4	576712	543306	45	725	14	784	2	0	0	0	0	0	0	167.596	0	9611.7
2008-01-25	490	09:08:00	-4	576539	543353	1	13	0	14	0	0	0	0	0	0	0	2.95023	0	169.198
2008-01-25	491	09:13:00	-4	576450	543388	12	510	11	533	1	0	0	0	0	0	0	117.951	0	6764.58
2008-01-25	492	09:19:00	-4	576355	543427	2	171	0	173	0	1	-	0	0	0	0	38.6922	1 ?	2219.02
2008-01-25	493	09:28:00	-4	576268	543462	0	6	0	6	0	0	0	0	0	0	0	1.3569	0	77.8189
2008-01-25	494	09:32:00	-4	576172	543492	0	2	0	2	0	0	0	0	0	0	0	0.452299	0	25.9396
2008-01-25	495	09:36:00	-4	576088	543541	31	438	13	482	3	0	0	0	0	0	0	102.324	0	5868.36
2008-01-25	496	09:42:00	-3	575998	543576	275	330	3	608	4	0	0	0	0	0	0	78.1532	0	4482.13
2008-01-25	497	09:47:00	-3	575916	543624	0	12	7	19	0	0	0	0	0	0	0	4.29684	0	246.426
2008-01-25	498	09:54:00	-3	575832	543654	4	7	0	11	65	1	-	0	0	0	0	1.88305	1 ?	107.994
2008-01-25	499	10:04:00	-3	575738	543692	0	18	3	21	5	4	-	0	0	0	0	4.76905	4?	273.508
2008-01-25	500	10:12:00	-3	575654	543732	13	30	0	43	0	0	0	0	0	0	0	6.91824	0	396.765
2008-01-25	501	10:24:00	-3	575568	543761	0	0	0	0	20	1	1.3	0	0	0	0	0.0796454	1 RY	4.56771
2008-01-25	502	10:38:00	-3	575488	543800	33	755	1	789	21	0	0	0	0	0	0	171.392	0	9829.45
2008-01-25	503	10:46:00	-2	575415	543829	1	1	0	2	44	0	0	0	0	0	0	0.411658	0	23.6089
2008-01-25	504	10:58:00	-2	575321	543870	1	5	0	6	19	0	0	0	0	0	0	1.2167	0	69.7785
2008-01-25	505	11:05:00	-2	575229	543882	17	600	11	628	13	0	0	0	0	0	0	138.404	0	7937.56
2008-01-25	506	11:42:00	-1	575146	543916	324	1926	4	2254	48	0	0	0	0	0	0	439.993	0	25233.9
2008-01-25	507	11:52:00	-1	575016	543944	0	3	0	3	29	0	0	0	0	0	0	0.793935	0	45.5326
2008-01-25	508	11:59:00	-1	574971	543978	0	0	0	0	3	0	0	0	0	0	0	0.0119468	0	0.685157
2008-01-25	509	12:04:00	-1	574890	544021	0	2	0	2	8	0	0	0	0	0	0	0.484157	0	27.7667
2008-01-25	510	12:09:00	-1	574817	544068	0	0	0	0	5	0	0	0	0	0	0	0.0199114	0	1.14193
2008-01-25	511	12:14:00	-1	574728	544099	0	0	0	0	4	0	0	0	0	0	0	0.0159291	0	0.913543
2008-01-25	512	12:18:00	-1	574639	544119	0	0	0	0	4	0	0	0	0	0	0	0.0159291	0	0.913543
2008-01-25	513	12:27:00	-1	574563	544160	0	0	0	0	21	0	0	0	0	0	0	0.0836277	0	4.7961
2008-01-25	514	12:39:00	-1	574473	544184	0	0	0	0	4	0	0	1	1	0	0	0.0159291	0	0.913543
2008-01-25	515	13:02:00	1	574377	544226	0	0	0	0	25	0	0	0	0	0	0	0.0995568	0	5.70964
2008-01-25	516	13:11:00	1	574294	544253	0	0	0	0	67	0	0	0	0	0	0	0.266812	0	15.3018
2008-01-25	517	13:30:00	1	574192	544299	0	926	5	931	4	0	0	0	0	0	0	210.561	0	12075.8
2008-01-25	518	13:37:00	1	574080	544319	0	1	0	1	17	0	0	0	0	0	0	0.293848	0	16.8524
2008-01-25	519	13:47:00	2	573992	544344				0								0		0
2008-01-25	520	13:54:00	2	573915	544376				0								0		0
2008-01-25	521	13:57:00	2	573836	544425	1	6	0	7	4	0	0	1	0.7	0	0	1.38312	0	79.3225
2008-01-25	522	14:02:00	2	573728	544474	0	1	1	2	10	0	0	0	0	0	0	0.492122	0	28.2235
2008-01-25	523	14:08:00	2	573652	544522	3	180	14	197	1	0	0	0	0	0	0	43.9079	0	2518.14
2008-01-25	524	14:13:00	2	573562	544544	0	1	0	1	0	1	2.5	0	0	0	0	0.22615	1 RY	12.9698
2008-01-25	525	14:16:00	2	573477	544577	1	0	0	1	0	0	0	0	0	0	0	0.0102888	0	0.59007
2008-01-25	526	14:20:00	2	573390	544614	133	1009	2	1144	4	0	0	0	0	0	0	230.022	0	13191.9
2008-01-25	527	14:26:00	2	573299	544643	0	0	0	0	2	1	7.1	0	0	0	0	0.00796454	1 RY	0.456771
2008-01-25	528	14:31:00	2	573214	544671	0	1	0	1	0	0	0	0	0	0	0	0.22615	0	12.9698
2008-01-25	529	14:35:00	2	573144	544700	113	320	0	433	0	0	0	0	0	0	0	73.5305	0	4217.02
2008-01-25	530	14:40:00	2	573056	544729	48	10	0	58	0	0	0	0	0	0	0	2.75536	0	158.022
2008-01-25	531	14:46:00	3	572967	544758	28	0	0	28	1	0	0	1	0.9	0	0	0.292069	0	16.7504
2008-01-25	532	14:51:00	3	572883	544784	2	988	12	1002	0	0	0	0	0	0	0	226.17	0	12971
2008-01-25	533	14:55:00	3	572786	544820	3	736	4	743	0	0	0	0	0	0	0	167.382	0	9599.43
2008-01-25	534	14:59:00	3	572708	544847	8	23	0	31	0	0	0	0	0	0	0	5.28375	0	303.026
2008-01-25	535	15:03:00	3	572619	544865	0	95	4	99	0	0	0	0	0	0	0	22.3888	0	1284.01
2008-01-25	536	15:08:00	3	572529	544900	2	6	0	8	0	0	0	0	0	0	0	1.37748	0	78.999
2008-01-25	537	15:14:00	3	572443	544931	2	12	1	15	0	0	0	1	1.5	0	0	2.96052	0	169.788
2008-01-25	538	15:19:00	3	572360	544963	0	6	2	8	0	1	6	0	0	0	0	1.8092	1 RY	103.759
2008-01-25	539	15:23:00	3	572273	544996	0	10	1	11	0	1	3	0	0	0	0	2.48765	1 RY	142.668
2008-01-25	540	15:26:00	3	572175	545016	0	328	7	335	0	0	0	0	0	0	0	75.7601	0	4344.89
2008-01-25	541	15:32:00	3	572087	545047	0	10	0	10	0	0	0	1	1.3	0	0	2.2615	0	129.698
2008-01-25	542	15:36:00	3	572005	545091	0	3	0	3	0	0	0	0	0	0	0	0.678449	0	38.9094
2008-01-25	543	15:39:00	3	571917	545123	0	2	0	2	0	0	0	0	0	0	0	0.452299	0	25.9396
2008-01-28	544	08:45:00	-6	580427	541656	0	0	0	0	0	0	0	0	0	0	0	0	0	0
2008-01-28	545	08:49:00	-6	580346	541709	0	0	0	0	0	1	0.8	0	0	0	0	0	1 RY	0
2008-01-28	546	08:53:00	-5	580265	541759	0	0	0	0	0	0	0	1	0.7	0	0	0	0	0
2008-01-28	547	08:57:00	-5	580181	541812				0								0		0
2008-01-28	548	09:01:00	-5	580103	541865				0								0		0
2008-01-28	549	09:07:00	-5	580021	541910	3	0	0	3	0	0	0	0	0	0	0	0.0308665	0	1.77021
2008-01-28	550	09:11:00	-5	579932	541955	6	0	0	6	0	0	0	0	0	0	0	0.061733	0	3.54042
2008-01-28	551	09:16:00	-5	579842	541993	0	0	0	0	0	1	0.5	0	0	0	0	0	1 RY	0
2008-01-28	552	09:21:00	-5	579753	542038	1	0	0	1	0	1	1	1	1.2	0	0	0.0102888	1 TR	0.59007
2008-01-28	553	09:26:00	-5	579672	542080	0	0	0	0	0	0	0	0	0	0	0	0	0	0
2008-01-28	554	09:35:00	-5	579567	542126	0	0	0	0	0	0	0	1	1.7	0	0	0	0	0
2008-01-28	555	09:39:00	-5	579467	542160	0	0	0	0	0	2	1.2, 1.8	0	0	0	0	0	1 TY, 1YR	0
2008-01-28	556	09:44:00	-5	579392	542206	3	0	0	3	0	0	0	0	0	0	0	0.0308665	0	1.77021
2008-01-28	557	09:45:00	-5	579295	542247	4	0	0	4	0	0	0	1	1.5	0	0	0.0411553	0	2.36028
2008-01-28	558	09:52:00	-5	579200	542282	1	0	0	1	0	0	0	0	0	0	0	0.0102888	0	0.59007
2008-01-28	559	10:00:00	-4	579101	542317	1	0	0	1	0	1	2.3	0	0	0	0	0.0102888	1 TY	0.59007
2008-01-28	560	10:03:00	-4	578991	542364	0	0	0	0	1	0	0	1	0.8	0	0	0.00398227	0	0.228386
2008-01-28	561	10:13:00	-4	578895	542410	43	1	0	44	0	0	0	0	0	0	0	0.668569	0	38.3428
2008-01-28	562	10:22:00	-4	578807	542440	9	67	7	83	1	0	0	0	0	0	0	16.8317	0	965.305
2008-01-28	563	10:37:00	-4	578716	542480	3	0	0	3	0	0	0	0	0	0	0	0.0308665	0	1.77021
2008-01-28	564	10:43:00	-4	578623	542513	0	0	0	0	2	0	0	1	0.4	0	0	0.00796454	0	0.456771
2008-01-28	565	10:51:00	-4	578551	542543	9	21	2	32	2	0	0	0	0	0	0	5.302	0	304.073
2008-01-28	566	11:01:00	-3	578460	542577	0	0	0	0	3	0	0	0	0	0	0	0.0119468	0	0.685157
2008-01-28	567	11:08:00	-3	578368	542614	0	0	0	0	37	0	0	0	0	0	0	0.147344	0	8.45027
2008-01-28	568	11:18:00	-3	578273	542655	1	0	0	1	67	0	0	0	0	0	0	0.277101	0	15.8919
2008-01-28	569	11:31:00	-3	578180	542696	0	0	0	0	17	1	4.1	0	0	0	0	0.0676986	1 RY	3.88256
2008-01-28	570	11:38:00	-3	578092	542738	0	277	243	520	1	0	0	0	0	0	0	117.602	0	6744.53
2008-01-28	571	11:47:00	-3	577989	542777	0	34	0	34	36	0	0	0	0	0	0	7.83245	0	449.196
2008-01-28	572	12:27:00	-2	577899	542805	0	0	0	0	15	0	0	0	0	0	0	0.0597341	0	3.42578
2008-01-28	573	12:34:00	-2	577813	542836	0	1	0	1	55	0	0	0	0	0	0	0.445175	0	25.531
2008-01-28	574	12:47:00	-2	577726	542870	200	0	0	200	13	0	0	0	0	0	0	2.10954	0	120.983
2008-01-28	575	13:16:00	-1	577636	542895	0	0	0	0	31	0	0	0	0	0	0	0.12345	0	7.07995
2008-01-28	576	13:24:00	-1	577540	542925	0	0	0	0	120	0	0	0	0	0	0	0.477873	0	27.4063
2008-01-28	577	13:36:00	-1	577470	542967	0	0	0	0	88	0	0	0	0	0	0	0.35044	0	20.0979
2008-01-28	578	13:48:00	-1	577378	543002	0	0	0	0	78	0	0	0	0	0	0	0.310617	0	17.8141
2008-01-28	579	14:12:00	1	577298	543045	1	0	0	1	39	0	0	0	0	0	0	0.165597	0	9.49711
2008-01-28	580	14:21:00	1	577209	543069	0	0	0	0	96	0	0	0	0	0	0	0.382298	0	21.925
2008-01-28	581	14:34:00	1	577125	543111	0	0	0	0	55	0	0	0	0	0	0	0.219025	0	12.5612
2008-01-28	582	14:43:00	1	577038	543144	0	0	0	0	89	0	0	0	0	1 britle star	0.6	0.354422	0	20.3263
2008-01-28	583	14:55:00	2	576945	543179	0	0	0	0	78	0	0	0	0	0	0	0.310617	0	17.8141
2008-01-28	584	15:17:00	2	576865	543217	0	900	33	933	0	0	0	0	0	0	0	210.998	0	12100.8
2008-01-28	585	15:19:00	2	576794	543236	1	3	0	4	35	0	0	0	0	0	0	0.828117	0	47.493
2008-01-28	586	15:26:00	2	576702	543274	0	3	0	3	58	0	0	0	0	0	0	0.909421	0	52.1558
2008-01-28	587	15:34:00	2	576616	543346	0	1	0	1	50	0	0	0	0	0	0	0.425263	0	24.3891
2008-01-28	588	15:50:00	2	576536	543377	0	3	0	3	33	0	0	0	0	0	0	0.809864	0	46.4462
2008-01-28	589	16:03:00	3	576470	543449	46	126	0	172	1	0	0	0	0	0	0	28.9721	0	1661.57
2008-01-28	590	16:22:00	3	576296	543488	1	16	1	18	2	0	0	0	0	0	0	3.8628	0	221.534
2008-01-28	591	16:31:00	3	576203	543535	0	1399	5	1404	0	0	0	0	0	0	0	317.514	0	18209.6
2008-01-28	592	16:39:00	3	576113	543581	51	630	17	698	0	0	0	0	0	0	0	146.844	0	8421.56
2008-01-28	593	16:48:00	3	576035	543628	211	990	0	1201	2	0	0	0	0	0	0	226.067	0	12965.1
2008-01-28	594	16:57:00	4	575955	543663	13	11	1	25	0	0	0	0	0	0	0	2.84755	0	163.309
2008-01-28	595	17:03:00	4	575861	543717	18	600	321	939	1	0	0	0	0	0	0	208.473	0	11956
2008-01-28	596	17:12:00	4	575772	543752	0	3	1	4	0	0	0	0	0	0	0	0.904598	0	51.8793
2008-01-28	597	17:18:00	4	575698	543795	1	7	0	8	0	1	1.7	0	0	0	0	1.59334	1 FR	91.3788
2008-01-29	598	08:57:00	-6	575588	543831				0								0		0
2008-01-29	599	09:15:00	-6	575493	543867	84	502	21	607	0	0	0	0	0	0	0	119.14	0	6832.78
2008-01-29	600	09:38:00	-5	575409	543891	244	70	0	314	1	0	0	0	0	0	0	18.3449	0	1052.09
2008-01-29	601	09:53:00	-5	575323	543931	25	406	9	440	0	0	0	0	0	0	0	94.1093	0	5397.22
2008-01-29	602	09:59:00	-5	575224	543964	10	823	18	851	1	1	-	0	0	0	0	190.299	1 ?	10913.7
2008-01-29	603	10:09:00	-5	575135	543995	3	181	6	190	1	0	0	1	0.9	0	0	42.3248	0	2427.35
2008-01-29	604	10:21:00	-5	575037	544044	1	500	15	516	0	0	0	0	0	0	0	116.477	0	6680.04
2008-01-29	605	10:42:00	-4	574944	544091	162	45	2	209	2	0	0	0	0	0	0	12.3038	0	705.629
2008-01-29	606	10:55:00	-4	574853	544124	36	4	0	40	0	1	5.3	0	0	0	0	1.275	1 RY	73.1218
2008-01-29	607	11:03:00	-4	574757	544145	9	571	10	590	0	0	0	0	0	0	0	131.486	0	7540.77
2008-01-29	608	11:51:00	-3	574657	544145	0	0	0	0	6	1	3.3	0	0	0	0	0.0238936	1 RY	1.37031
2008-01-29	609	12:42:00	-2	574557	544180	1	1	0	2	18	1	1.5	0	0	0	0	0.308119	1 RY	17.6708
2008-01-29	610	12:57:00	-2	574473	544215	5	1	0	6	5	0	0	0	0	0	0	0.297505	0	17.0621
2008-01-29	611	13:02:00	-2	574388	544245	33	200	3	236	31	0	0	0	0	0	0	46.3713	0	2659.42
2008-01-29	612	13:09:00	-2	574276	544277	1	0	0	1	19	1	7	0	0	0	0	0.085952	1 RY	4.9294
2008-01-29	613	13:27:00	-2	574168	544313	29	359	10	398	12	0	0	0	0	0	0	83.7954	0	4805.71
2008-01-29	614	14:09:00	-1	574073	544334	0	1076	7	1083	0	3	3.3, 4.0, 3.2	0	0	0	0	244.92	3 FR	14046.3
2008-01-29	615	15:18:00	1	573983	544362	2	132	3	137	1	0	0	0	0	0	0	30.5548	0	1752.33
2008-01-29	616	15:30:00	2	573891	544403	0	1	0	1	17	0	0	0	0	0	0	0.293848	0	16.8524
2008-01-29	617	15:41:00	2	573812	544447	0	475	0	475	0	0	0	0	0	0	0	107.421	0	6160.66

## Sheet: Netherlands benthos sampling
Date	Sample no.	Time	Tide	Site	31U	UTM	0-10	10-20	20-30	30-40	40-50	>50	total	0-5	>5	shrimp		J p sample	KJ p m2
2007-09-17	9b	11:45:00	-6	D15-16	0632083	5905278	0	0	0	0	0	0	0	0	0	0		0	0
2007-09-17	10a	11:49:00	-6	D16-17	0632177	5905348	0	0	0	0	0	0	0	0	0	0		0	0
2007-09-17	10b	11:53:00	-6	D16-17	0632221	5905380	0	0	0	0	0	0	0	0	0	0		0	0
2007-09-17	11a	11:56:00	-6	D17-18	0632293	5905432	0	0	0	0	0	0	0	0	0	0		0	0
2007-09-17	11b	12:00:00	-6	D17-18	0632371	5905484	0	0	0	0	0	0	0	0	0	0		0	0
2007-09-17	12a	12:05:00	-6	D18-19	0632468	5905568	0	0	0	0	0	0	0	0	0	0		0	0
2007-09-17	12b	12:07:00	-6	D18-19	0632550	5905610	0	0	0	0	0	0	0	0	0	0		0	0
2007-09-17	13a	12:15:00	-6	D19-20	0632607	5905669	0	0	0	0	0	0	0	0	0	0		0	0
2007-09-17	13b	12:18:00	-6	D19-20	0632660	5905710	0	0	0	0	0	0	0	0	0	0		0	0
2007-09-17	14a	12:21:00	-6	D20-21	0632728	5905778	0	0	0	0	0	0	0	0	0	0		0	0
2007-09-17	14b	12:49:00	-5	D20-21	0632765	5905813	0	0	0	0	0	0	0	0	0	0		0	0
2007-09-17	15a	12:56:00	-5	D21-22	0632885	5905891	0	0	0	0	0	0	0	2	0	0		0.0540715	0.00440615
2007-09-17	15b	13:08:00	-5	D21-22	0632936	5905935	0	0	0	0	0	0	0	0	0	0		0	0
2007-09-17	16a	13:24:00	-5	D22-23	0633010	5905993	36	25	8	5	2	3	79	4	1	0		0.443703	0.0361562
2007-09-17	16b	13:36:00	-5	D22-23	0633065	5906033	8	5	1	0	0	0	14	2	0	0		0.122632	0.009993
2007-09-18	13a	13:37:00	-5	D19-20	0632580	5905664	0	1	0	0	0	0	1	0	0	1		0.0091699	0.000747232
2007-09-18	12b	13:46:00	-5	D18-19	0632511	5905601	0	0	0	0	0	0	0	0	0	0		0	0
2007-09-18	12a	13:53:00	-5	D18-19	0632441	5905561	9	5	7	4	2	0	27	1	0	0		0.104167	0.00848828
2007-09-18	11b	14:08:00	-5	D17-18	0632381	5905484	1	0	0	0	0	0	1	0	0	0		0.00857012	0.000698357
2007-09-25	15a	09:26:00	-5	D21-22	0632880	5905898	2	0	0	0	1	0	3	5	4	0		0.260462	0.0212244
2007-09-25	15b	09:40:00	-5	D21-22	0632920	5905928	7	4	2	5	3	3	24	1	0	0		0.0870266	0.00709157
2007-09-26	16	10:04:00	-5	D22-23	0632899	5905911	1	3	2	1	0	0	7	0	0	0		0.00857012	0.000698357
2007-09-26	15	10:14:00	-5	D21-22	0632765	5905819	1	1	0	0	0	1	3	0	0	0		0.00857012	0.000698357
2007-09-26	14	10:22:00	-5	D20-21	0632610	5905687	0	0	0	0	1	0	1	0	0	0		0	0
2007-09-26	13	10:31:00	-5	D19-20	0632479	5905598	5	2	4	1	0	0	12	2	0	0		0.0969221	0.00789793
2007-09-17	17a	13:45:00	-4	D23-24	0633155	5906097	9	10	9	6	3	4	41	0	0	0		0.0771311	0.00628521
2007-09-17	17b	14:02:00	-4	D23-24	0633263	5906136	14	16	11	3	8	15	67	1	0	1		0.156187	0.0127273
2007-09-17	18a	14:13:00	-4	D24-25	0633302	5906212	0	0	0	0	0	0	0	0	0	0		0	0
2007-09-17	18b	14:17:00	-4	D24-25	0633351	5906243	0	0	0	0	0	0	0	0	0	0		0	0
2007-09-17	19a	14:32:00	-4	D25-26	0633435	5906318	9	4	4	3	2	3	25	1	0	0		0.104167	0.00848828
2007-09-17	19b	14:43:00	-4	D25-26	0633502	5906360	2	1	1	0	0	0	4	1	0	0		0.044176	0.00359979
2007-09-18	11a	14:17:00	-4	D17-18	0632316	5905464	0	0	0	0	0	0	0	2	0	0		0.0540715	0.00440615
2007-09-18	10b	14:30:00	-4	D16-17	0632215	5905395	0	0	0	0	0	0	0	6	0	0		0.162214	0.0132184
2007-09-18	10a	14:41:00	-4	D16-17	0632165	5905369	7	9	4	6	2	3	31	2	3	1		0.204339	0.0166511
2007-09-18	9b	15:07:00	-4	D15-16	0632067	5905297	4	2	3	1	0	3	13	2	0	1		0.0975219	0.0079468
2007-09-19	5b	15:32:00	-4	D11-12	0631230	5903973	9	12	6	6	8	5	46	0	0	0	1 30-40B Nioz	0.0771311	0.00628521
2007-09-26	12	10:45:00	-4	D18-19	0632329	5905482	1	0	0	1	0	0	2	11	2	0		0.360035	0.0293383
2007-09-26	11	11:00:00	-4	D17-18	0632191	5905395	3	0	1	2	0	1	7	0	0	0		0.0257104	0.00209507
2007-09-26	10	11:15:00	-4	D16-17	0632025	5905280	0	5	0	4	3	1	13	0	0	0		0	0
2007-09-26	9	11:30:00	-4	D15-16	0631905	5905193	10	4	2	3	4	1	24	0	0	0		0.0857012	0.00698357
2007-09-24	1a	09:09:00	-4	D6-8	0633715	5906457	4	2	2	0	0	0	8	1	0	0		0.0613162	0.0049965
2007-09-24	1b	09:19:00	-4	D6-8	0630885	5904393	6	20	10	13	7	3	59	0	0	0		0.0514207	0.00419014
2007-09-24	2a	09:34:00	-4	D8-9	0631001	5904496	14	3	3	9	16	14	59	1	0	0		0.147017	0.0119801
2007-09-25	16a	09:53:00	-4	D22-23	0633016	5906018	16	4	2	3	1	1	27	0	0	0		0.137122	0.0111737
2007-09-25	16b	10:07:00	-4	D22-23	0633062	5906047	0	0	0	0	0	0	0	0	0	0		0	0
2007-09-25	17a	10:19:00	-4	D23-24	0633161	5906113	3	6	0	1	2	4	16	0	0	0		0.0257104	0.00209507
2007-09-25	17b	10:35:00	-4	D23-24	0633198	5906146	0	2	0	0	1	1	4	0	0	0		0	0
2007-09-17	20a	14:57:00	-3	D26-27	0633598	5906416	0	0	0	0	0	0	0	0	0	0		0	0
2007-09-17	20b	15:10:00	-3	D26-27	0633653	5906473	12	20	20	20	13	11	96	0	0	0		0.102841	0.00838028
2007-09-17	21a	15:21:00	-3	D27-28	0633739	5906537	0	0	0	0	0	0	0	0	0	0		0	0
2007-09-17	21b	15:38:00	-3	D27-28	0633795	5906564	3	8	10	6	3	4	34	0	0	0		0.0257104	0.00209507
2007-09-18	9a	15:23:00	-3	D15-16	0632009	5905264	4	4	4	0	0	1	13	0	0	0		0.0342805	0.00279343
2007-09-18	8b	15:38:00	-3	D14-15	0631929	5905223	0	2	2	2	0	5	11	0	0	0		0	0
2007-09-18	8a	16:01:00	-3	D14-15	0631878	5905183	5	10	4	1	3	1	24	0	0	0		0.0428506	0.00349178
2007-09-19	6a	15:59:00	-3	D12-13	0631612	5904979	18	1	0	0	0	0	19	0	0	0		0.154262	0.0125704
2007-09-19	6b	16:14:00	-3	D12-13	0631657	5901657	3	2	4	0	0	1	10	0	0	0		0.0257104	0.00209507
2007-09-25	18a	10:50:00	-3	D24-25	0633308	5906231	4	8	3	1	0	1	17	0	0	0		0.0342805	0.00279343
2007-09-25	18b	11:03:00	-3	D24-25	0633359	5906275	12	12	1	10	10	8	53	0	0	0		0.102841	0.00838028
2007-09-25	19a	11:20:00	-3	D25-26	0633448	5906346	1	0	2	1	3	7	14	0	0	0		0.00857012	0.000698357
2007-09-25	19b	11:34:00	-3	D25-26	0633510	5906375	5	4	3	8	9	23	52	0	0	0		0.0428506	0.00349178
2007-09-26	8	11:49:00	-3	D14-15	0631792	5905090	1	2	1	0	0	0	4	0	0	0		0.00857012	0.000698357
2007-09-26	7	12:01:00	-3	D13-14	0631633	5904983	2	5	1	3	0	2	13	0	0	0		0.0171402	0.00139671
2007-09-26	6	12:31:00	-3	D12-13	0631494	5904883	17	8	3	1	2	0	31	0	0	0		0.145692	0.0118721
2007-09-17	22a	15:58:00	-2	D28-29	0633892	5906638	3	20	24	16	7	13	83	0	0	0		0.0257104	0.00209507
2007-09-17	22b	16:17:00	-2	D28-29	0633971	5906685	0	2	1	0	1	0	4	0	0	0		0	0
2007-09-17	23a	16:26:00	-2	D29-30	0634049	5906725	1	5	6	7	6	17	42	0	0	0		0.00857012	0.000698357
2007-09-18	7b	16:20:00	-2	D13-14	0631806	5905124	14	4	2	0	0	1	21	0	0	0		0.119982	0.00977699
2007-09-18	7a	16:39:00	-2	D13-14	0631754	5905097	15	8	1	0	0	0	24	1	0	0		0.155588	0.0126784
2007-09-18	6b	16:59:00	-2	D12-13	0631627	5904994	4	0	0	0	0	0	4	5	0	1		0.178629	0.014556
2007-09-24	2b	11:28:00	-2	D8-9	0631019	5904562	0	0	0	0	0	0	0	0	0	1		0.0091699	0.000747232
2007-09-24	3a	11:35:00	-2	D9-10	0631130	5904632	0	0	0	1	0	1	2	0	0	0		0	0
2007-09-24	3b	11:39:00	-2	D9-10	0631172	5904689	1	0	0	1	0	0	2	0	0	0		0.00857012	0.000698357
2007-09-24	4a	11:46:00	-2	D10-11	0631282	5904767	2	0	0	0	0	0	2	0	0	0		0.0171402	0.00139671
2007-09-24	4b	11:53:00	-2	D10-11	0631320	5904793	1	1	1	4	2	8	17	0	0	0		0.00857012	0.000698357
2007-09-25	20a	11:57:00	-2	D26-27	0633592	5906439	2	10	5	5	13	4	39	0	0	0		0.0171402	0.00139671
2007-09-25	20b	12:13:00	-2	D26-27	0633630	5906474	0	5	8	3	2	5	23	0	0	0		0	0
2007-09-25	21a	12:34:00	-2	D27-28	0633729	5906566	1	14	5	8	8	22	58	0	0	0		0.00857012	0.000698357
2007-09-26	5	12:52:00	-2	D11-12	0631327	5904763	2	8	6	15	21	17	69	0	0	0		0.0171402	0.00139671
2007-09-26	4	13:16:00	-2	D10-11	0631182	5904662	2	10	10	5	17	13	57	0	0	0		0.0171402	0.00139671
2007-09-26	3	13:36:00	-2	D9-10	0631041	5904550	18	5	11	9	10	5	58	0	0	0		0.154262	0.0125704
2007-09-17	23b	16:45:00	-1	D29-30	0634073	5906746	1	1	8	5	1	6	22	0	0	0		0.00857012	0.000698357
2007-09-17	23a	17:10:00	-1	D29-30	0634084	5906767	10	6	12	9	7	11	55	1	3	0		0.193844	0.0157959
2007-09-18	6a	17:16:00	-1	D12-13	0631575	5904978	2	3	1	0	0	0	6	1	0	1		0.0533459	0.00434702
2007-09-18	5b	17:32:00	-1	D11-12	0631500	5904915	0	0	0	0	0	0	0	0	0	0		0	0
2007-09-24	5a	12:02:00	-1	D11-12	0631426	5904887	0	0	0	0	0	0	0	0	0	1		0.0091699	0.000747232
2007-09-24	5b	12:08:00	-1	D11-12	0631470	5904915	2	2	2	10	1	32	49	0	0	0		0.0171402	0.00139671
2007-09-24	6a	12:22:00	-1	D12-13	0631547	5905021	2	0	0	0	0	0	2	0	0	0		0.0171402	0.00139671
2007-09-24	6b	12:28:00	-1	D12-13	0631603	5905034	0	0	0	0	0	0	0	0	0	0		0	0
2007-09-24	7a	12:45:00	-1	D13-14	0631699	5905134	2	3	0	1	0	0	6	0	0	0		0.0171402	0.00139671
2007-09-24	7b	12:50:00	-1	D13-14	0631729	5905162	5	5	0	5	5	31	51	0	0	0		0.0428506	0.00349178
2007-09-25	21b	12:53:00	-1	D27-28	0633793	5906579	3	8	11	2	1	3	28	0	0	0		0.0257104	0.00209507
2007-09-25	22a	13:32:00	-1	D28-29	0633880	5906659	0	1	2	1	2	25	31	0	0	0		0	0
2007-09-25	22b	13:45:00	-1	D28-29	0633933	5906680	0	0	0	0	0	0	0	0	0	0		0	0
2007-09-26	2	13:54:00	-1	D8-9	0630886	5904447	4	4	6	7	7	3	31	0	0	0		0.0342805	0.00279343
2007-09-26	1	14:08:00	-1	D6-8	0630745	5904325	6	12	13	21	15	9	76	0	0	0		0.0514207	0.00419014
2007-09-20	7a	09:18:00	1	D13-14	0631222	5903972	5	4	0	1	2	2	14	0	0	0		0.0428506	0.00349178
2007-09-24	8a	13:13:00	1	D14-15	0631839	5905236	0	0	0	0	0	0	0	0	0	3		0.0275097	0.00224169
2007-09-24	8b	13:19:00	1	D14-15	0631869	5905253	0	2	0	0	0	0	2	0	0	0		0	0
2007-09-24	9a	13:28:00	1	D15-16	0631946	5905322	3	0	0	0	0	0	3	0	0	0		0.0257104	0.00209507
2007-09-24	9b	13:33:00	1	D15-16	0632006	5905348	0	1	1	0	0	0	2	0	0	0		0	0
2007-09-24	10a	13:41:00	1	D16-17	0632093	5905422	4	0	0	0	0	0	4	0	0	1		0.0434504	0.00354066
2007-09-24	10b	13:48:00	1	D16-17	0632138	5905465	2	0	0	0	0	0	2	0	0	0		0.0171402	0.00139671
2007-09-25	23a	13:57:00	1	D29-30	0634033	5906757	7	3	7	7	7	6	37	0	1	0		0.0870266	0.00709157
2007-09-25	23b	14:16:00	1	D29-30	0634088	5906773	1	1	4	3	2	4	15	0	0	0		0.00857012	0.000698357
2007-09-25	23b	14:30:00	1	D29-30	0634091	5906762	0	0	0	0	0	0	0	0	0	0		0	0
2007-09-25	23a	14:44:00	1	D29-30	0634056	5906755	1	1	5	5	1	6	19	0	0	0		0.00857012	0.000698357
2007-09-20	7b	09:30:00	2	D13-14	0631783	5905106	8	5	0	0	2	1	16	0	0	2		0.0869008	0.00708132
2007-09-20	8a	09:48:00	2	D14-15	0631879	5905173	4	5	1	1	1	1	13	0	0	0		0.0342805	0.00279343
2007-09-20	8b	10:02:00	2	D14-15	0631910	5905197	5	6	2	1	4	8	26	0	0	0		0.0428506	0.00349178
2007-09-20	9a	10:17:00	2	D15-16	0632006	5905262	8	2	1	1	0	1	13	0	0	0		0.068561	0.00558685
2007-09-24	11a	13:56:00	2	D17-18	0632244	5905533	1	0	0	0	0	1	2	0	2	0		0.0626416	0.0051045
2007-09-24	11b	14:03:00	2	D17-18	0632304	5905556	5	1	0	2	2	4	14	0	0	0		0.0428506	0.00349178
2007-09-24	12a	14:11:00	2	D18-19	0632400	5905634	0	0	0	0	0	0	0	0	0	0		0	0
2007-09-24	12b	14:28:00	2	D18-19	0632498	5905619	1	1	0	0	0	0	2	0	0	0		0.00857012	0.000698357
2007-09-24	13a	14:37:00	2	D19-20	0632561	5905696	6	0	4	4	9	9	32	0	0	1		0.0605906	0.00493737
2007-09-24	13b	14:54:00	2	D19-20	0632608	5905722	9	20	11	7	5	3	55	0	0	0		0.0771311	0.00628521
2007-09-25	22b	14:58:00	2	D28-29	0633954	5906682	0	0	0	0	0	0	0	0	0	0		0	0
2007-09-25	22a	15:08:00	2	D28-29	0633895	5906659	2	1	0	1	0	0	4	0	0	0		0.0171402	0.00139671
2007-09-25	21b	15:21:00	2	D27-28	0633791	5906507	3	0	1	0	0	1	5	0	0	0		0.0257104	0.00209507
2007-09-25	21a	15:27:00	2	D27-28	0633724	5906563	2	1	0	0	0	1	4	0	2	0		0.0712117	0.00580286
2007-09-25	23	15:42:00	2	D29-30	0634075	5906709	0	8	4	7	5	5	29	0	0	0		0	0
2007-09-19	1a	09:16:00	3	D6-8	0631516	5904837	6	6	5	4	2	4	27	0	1	0	Bol naar Nioz	0.0784565	0.00639321
2007-09-19	1b	09:30:00	3	D6-8	0630866	5904742	1	0	0	0	0	0	1	0	0	0		0.00857012	0.000698357
2007-09-19	2a	09:42:00	3	D8-9	0631020	5904710	9	3	0	0	0	0	12	0	0	0		0.0771311	0.00628521
2007-09-20	9b	10:30:00	3	D15-16	0632052	5905293	4	4	5	1	1	2	17	0	0	0		0.0342805	0.00279343
2007-09-20	10a	10:44:00	3	D16-17	0632164	5905369	5	1	1	1	2	2	12	1	0	0		0.0698863	0.00569486
2007-09-20	10b	10:57:00	3	D16-17	0632205	5905403	8	0	0	0	1	1	10	5	0	0		0.20374	0.0166022
2007-09-20	11a	11:11:00	3	D17-18	0632301	5905465	2	0	1	1	0	0	4	17	2	0		0.530819	0.0432551
2007-09-24	14a	15:15:00	3	D20-21	0632701	5905819	2	4	5	4	1	2	18	0	0	0		0.0171402	0.00139671
2007-09-24	14b	15:27:00	3	D20-21	0632751	5905844	2	2	4	5	3	3	19	1	0	0		0.044176	0.00359979
2007-09-25	22	16:07:00	3	D28-29	0633944	5906644	2	2	0	1	2	0	7	0	0	0		0.0171402	0.00139671
2007-09-25	21	16:26:00	3	D27-28	0633808	5906552	7	0	5	1	1	1	15	0	0	0		0.0599908	0.0048885
2007-09-25	20	16:38:00	3	D26-27	0633659	5906443	5	0	1	2	1	1	10	0	0	0		0.0428506	0.00349178
2007-09-18	22b	09:30:00	4	D28-29	0634000	5906727	0	0	0	0	0	0	0	0	0	0		0	0
2007-09-18	22a	09:37:00	4	D28-29	0633938	5906611	2	1	1	0	0	1	5	1	2	0		0.0982475	0.00800593
2007-09-18	21b	09:44:00	4	D27-28	0633835	5906545	0	0	0	0	0	0	0	2	0	1		0.0632414	0.00515338
2007-09-18	21a	09:50:00	4	D27-28	0633771	5906505	1	8	1	1	3	0	14	3	1	0		0.116713	0.00951065
2007-09-18	20b	09:59:00	4	D26-27	0633691	5906455	0	4	2	0	0	0	6	1	0	1		0.0362057	0.0029503
2007-09-18	20a	10:07:00	4	D26-27	0633615	5906387	0	0	0	0	0	0	0	0	0	0		0	0
2007-09-19	2b	09:56:00	4	D8-9	0631063	5904625	10	2	0	3	0	0	15	0	0	0	1 30-40A Nioz	0.0857012	0.00698357
2007-09-19	3a	10:12:00	4	D9-10	0631169	5904585	12	1	1	0	0	0	14	0	0	0		0.102841	0.00838028
2007-09-19	3b	10:27:00	4	D9-10	0631221	5904572	5	1	1	0	1	0	8	0	0	1	garnaal Nioz	0.0520205	0.00423902
2007-09-19	4a	10:44:00	4	D10-11	0631318	5904489	1	0	1	0	1	1	4	1	0	0		0.0356059	0.00290143
2007-09-20	11b	11:28:00	4	D17-18	0632367	5905512	9	9	3	1	3	0	25	0	0	0		0.0771311	0.00628521
2007-09-20	12a	11:43:00	4	D18-19	0632462	5905585	3	1	1	0	0	0	5	2	0	1		0.0889518	0.00724845
2007-09-20	12b	11:56:00	4	D18-19	0632505	5905604	0	2	0	0	0	0	2	4	3	3		0.21676	0.0176632
2007-09-20	13a	12:08:00	4	D19-20	0632588	5905678	0	0	0	0	0	0	0	0	0	0		0	0
2007-09-20	13b	12:11:00	4	D19-20	0632628	5905713	3	2	1	4	1	0	11	0	1	0		0.0527461	0.00429814
2007-09-25	19	16:52:00	4	D25-26	0633519	5906352	3	6	1	3	6	2	21	0	0	0		0.0257104	0.00209507
2007-09-25	18	17:07:00	4	D24-25	0633356	5906234	0	0	0	0	0	0	0	0	0	0		0	0
2007-09-25	17	17:16:00	4	D23-24	0633200	5906129	0	1	0	2	3	0	6	0	0	0		0	0
2007-09-17	1a	10:36:00	5	D6-8	0630784	5904235	0	0	0	0	0	0	0	0	0	0		0	0
2007-09-17	1b	10:41:00	5	D6-8	0630892	5904328	0	1	0	0	0	0	1	0	0	0		0	0
2007-09-18	19b	10:11:00	5	D25-26	0633553	5906356	0	0	0	0	0	0	0	0	0	0		0	0
2007-09-18	19a	10:17:00	5	D25-26	0633499	5906308	0	0	0	0	0	0	0	0	0	1		0.0091699	0.000747232
2007-09-18	18b	10:24:00	5	D24-25	0633386	5906246	0	0	0	0	0	0	0	0	0	0		0	0
2007-09-18	18a	10:32:00	5	D24-25	0633318	5906191	0	0	0	0	0	0	0	0	0	0		0	0
2007-09-18	17b	10:37:00	5	D23-24	0633238	5906133	0	0	0	0	0	0	0	0	0	0		0	0
2007-09-18	17a	10:41:00	5	D23-24	0633180	5906085	0	0	0	0	0	0	0	0	0	0		0	0
2007-09-18	16b	10:45:00	5	D22-23	0633088	5906029	0	0	0	0	0	0	0	0	0	0		0	0
2007-09-18	16a	10:51:00	5	D22-23	0633025	5905984	0	0	0	0	0	0	0	0	0	0		0	0
2007-09-18	15b	10:57:00	5	D21-22	0632953	5905933	0	0	0	0	0	0	0	0	0	0		0	0
2007-09-18	15a	11:02:00	5	D21-22	0632882	5905877	0	0	0	0	0	0	0	0	0	0		0	0
2007-09-18	14b	11:06:00	5	D20-21	0632815	5905828	0	0	0	0	0	0	0	0	0	0		0	0
2007-09-19	4b	10:52:00	5	D10-11	0631365	5904361	12	6	1	0	1	2	22	0	0	0		0.102841	0.00838028
2007-09-19	5a	11:06:00	5	D11-12	0631476	5904886	0	0	0	0	0	0	0	0	0	0		0	0
2007-09-17	2a	10:47:00	6	D8-9	0631047	5904457	0	0	0	0	0	0	0	2	0	0		0.0540715	0.00440615
2007-09-17	2b	10:54:00	6	D8-9	0631096	5904504	0	0	0	0	0	0	0	0	0	0		0	0
2007-09-17	3a	10:57:00	6	D9-10	0631192	5904575	0	0	0	0	0	0	0	0	0	0		0	0
2007-09-17	3b	11:00:00	6	D9-10	0631249	5904620	0	0	0	0	0	0	0	0	0	0		0	0
2007-09-17	4a	11:05:00	6	D10-11	0631315	5904679	0	0	0	0	0	0	0	0	0	0		0	0
2007-09-17	4b	11:08:00	6	D10-11	0631371	5904720	0	0	0	0	0	0	0	0	0	0		0	0
2007-09-17	5a	11:12:00	6	D11-12	0631449	5904788	0	0	0	0	0	0	0	0	0	0		0	0
2007-09-17	5b	11:15:00	6	D11-12	0631527	5904847	0	0	0	0	0	0	0	0	0	0		0	0
2007-09-17	6a	11:20:00	6	D12-13	0631616	5904919	0	0	0	0	0	0	0	0	0	0		0	0
2007-09-17	6b	11:24:00	6	D12-13	0631682	5904974	0	0	0	0	0	0	0	0	0	0		0	0
2007-09-17	7a	11:28:00	6	D13-14	0631787	5905054	0	0	0	0	0	0	0	0	0	0		0	0
2007-09-17	7b	11:32:00	6	D13-14	0631822	5905083	0	1	0	0	0	0	1	0	0	0		0	0
2007-09-17	8a	11:36:00	6	D14-15	0631899	5905137	0	0	0	0	0	0	0	0	0	0		0	0
2007-09-17	8b	11:39:00	6	D14-15	0631978	5905201	0	0	0	0	0	0	0	0	0	0		0	0
2007-09-17	9a	11:44:00	6	D15-16	0632034	5905253	0	0	0	0	0	0	0	0	0	0		0	0
2007-09-18	14a	11:12:00	6	D20-21	0632726	5905772	0	0	0	0	0	0	0	0	0	0		0	0
2007-09-18	13b	11:18:00	6	D19-20	0632652	5905706	0	0	0	0	0	0	0	0	0	0		0	0
									2496	2640
									94.5455

## Sheet: Energy estimates
site	class	g sample/pil	DW p worm	g benz p pil	g ash	ashfree dryweight	AFDW p g sample	Prey quality	total g benz+afdw	fractie sample	fractie benz.	j/g benzoeen	# worm p sample	ash p worm	H (j/g)	H met correctie	J/g AFDW	J/g sample	g whole sample	Jp organism
vlieland	0-10	0.4275	0.000790747		0.2005	0.227		20.4243	0.227	1	0	0	540.628	0.000370865	10838				0.4444	8.57012
vlieland	10-20	0.4557	0.002202		0.1161	0.3396		52.7682	0.3396	1	0	0	206.948	0.000561011	15853				1.0988	34.9084
vlieland	10-20	0.49	0.002202		0.1206	0.3694		55.2568	0.3694	1	0	0	222.525	0.000541963	15937				1.0988	35.0933
vlieland	20-30	0.5407	0.00455664		0.0968	0.4439		82.7268	0.4439	1	0	0	118.662	0.000815762	18420				1.5447	83.9333
vlieland	20-30	0.5768	0.00455664		0.1018	0.475		84.1749	0.475	1	0	0	126.585	0.000804205	18064				1.5447	82.3111
vlieland	30-40	0.5369	0.005959		0.0729	0.464		114.822	0.464	1	0	0	90.0991	0.000809109	18818				2.0201	112.136
vlieland	30-40	0.5743	0.005959		0.0896	0.4847		97.5892	0.4847	1	0	0	96.3753	0.000929699	19443				2.0201	115.861
vlieland	40-50	0.5713	0.00803929		0.0709	0.5004		127.323	0.5004	1	0	0	71.0635	0.000997699	18907				2.4761	151.999
vlieland	40-50	0.5303	0.00803929		0.0637	0.4666		132.142	0.4666	1	0	0	65.9636	0.000965685	18909				2.4761	152.015
vlieland	>50	0.6895	0.0112807		0.0852	0.6043		127.953	0.6043	1	0	0	61.1219	0.00139394	18934				4.862	213.59
vlieland	>50	0.5616	0.0112807		0.0744	0.4872		118.133	0.4872	1	0	0	49.784	0.00149446	18716				4.862	211.13
vlieland	H. arenarius 0-5 + >5	0.2583	0.00133306		0.0463	0.212		82.6022	0.212	1	0	0	193.765	0.000238949	20281				0.1613	27.0357
vlieland	shrimp	0.0072	0.000352174		0.0004	0.0068		306.68	0.0068	1	0	0	20.4444	1.95652e-05	26038				0.0081	9.1699
Ghana
hydrobia		0.489		0.4136	0.4068	0.0822	0.168098	3.64525	0.4958	0.165793	0.834207	0			11765	11765	0		4.2773
hydrobia		0.511		0.4439	0.4312	0.0798	0.156164	3.33857	0.5237	0.152377	0.847623	0			12161	12161	0		4.2773
asanta-kikam		0.8939		0.744	0.6755	0.2184	0.244323	5.83262	0.9624	0.226933	0.773067	0			12678	12678	0			0
asanta-kikam		0.8691		0.287	0.7675	0.1016	0.116903	2.3881	0.3886	0.261451	0.738549	0			6760	6760	0			0
donax klein		0.9794		0.2512	0.7646	0.2148	0.219318	5.068	0.466	0.460944	0.539056	0			5792	5792	0			0
donax klein		0.8784		0.5683	0.6711	0.2073	0.235997	5.57248	0.7756	0.267277	0.732723	0			10477	10477	0			0
shrimp ghana		0.2851		0.2851	0.044	0.2411	0.845668	98.851	0.5262	0.458191	0.541809	0			19577					0
worms ghana		0.5676		0	0.047	0.5206	0.917195	199.822	0.5206	1	0	0			17477				0.6673	0
kikam-esiama		0.876		0.4064	0.8504	0.0256	0.0292237	0.543067	0.432	0.0592593	0.940741	0			6868	6868	0			0
kikam-esiama		0.8761		0.484	0.6947	0.1814	0.207054	4.7106	0.6654	0.272618	0.727382	0			9635	9635	0			0
asenko-kikam		0.5488		0.3071	0.4287	0.1201	0.218841	5.05389	0.4272	0.281133	0.718867	0			9916	9916	0			0
asenko-kikam		0.6619		0.4168	0.5219	0.14	0.211512	4.83924	0.5568	0.251437	0.748563	0			10343	10343	0			0
bobrama		0.8433		0.6176	0.6867	0.1566	0.185699	4.11397	0.7742	0.202273	0.797727	0			11115	11115	0			0
bobrama		0.672		0.4831	0.5577	0.1143	0.170089	3.69728	0.5974	0.191329	0.808671	0			11100	11100	0			0
donax large									0			0
donax large								4.58624	0			0

## Sheet: Netherlands activity
Date		Location	Tide(time before(-) and after low tide)	Time	Nr birds	Nr counted/estimated	# checked for colourrings	# colour-ringed	#juv	#adult	#unknown age	Colourring codes	#sleeping	#foraging	#preening	running	#flying
2007-08-28		D27-28	1	15:03:00	5	c	0	0	0	0	5						5
2007-08-30		Polder	1	17:00:00	1	C	1	0	1	0	0					1
2007-09-03		D6-7	1	13:01:00	2	C	2	0	2	0	0			2
2007-09-03		D3-4	1	19:10:00	2	C	2	0	1	0	1		1		1
2007-09-03		D5-6	1	19:27:00	4	C	4	0	2	0	2			4
2007-09-07		D18	1	11:08:00	1	C	1	0	0	1	0			1
2007-09-07		D18	1	11:12:00	1	C	1	0	1	0	0			1
2007-09-07		D18-19	1	11:14:00	2	C	2	0	1	0	1			2
2007-09-07		D20	1	11:31:00	2	C	2	0	2	0	0			2
2007-09-07			1	11:33:00	2	C	2	0	2	0	0			2
2007-09-07		D21	1	11:42:00	1	C	1	0	1	0	0			1
2007-09-07		D21-22	1	11:45:00	12	C	10	0	4	2	6			12
2007-09-07			1	11:46:00	12	C	10	0	4	2	6						12
2007-09-07		D23	1	11:56:00	1	C	1	0	0	0	1			1			1
2007-09-07		D24	1	12:01:00	1	C	1	0	0	1	0		1
2007-09-07			1	12:04:00	1	C	1	0	0	1	0						1
2007-09-08		Westpunt-hut	1	13:12:00	1	C	1	0	0	1	0			1
2007-09-09		Westpunt-hut	1	14:04:00	1	C	1	0	0	1	0			1		1
2007-09-09		Westpunt-hut	1	14:07:00	1	C	1	0	1	0	0			1
2007-09-09		Westpunt-hut	1	14:07:00	2	C	2	0	1	1	0						2
2007-09-09		Hut-duin3	1	14:21:00	4	C	4	0	1	2	1			4
2007-09-09		Hut-duin3	1	14:33:00	1	C	1	0	1	0	0			1
2007-09-24		D14-15	1	13:13:00	1	C	0	0	0	0	1			1			1
2007-09-24		D14-15	1	13:19:00	1	C	0	0	0	0	1						1
2007-09-24		D15-16	1	13:28:00	1	C	1	0	0	0	1			1
2007-09-24		D15	1	13:28:00	1	C	0	0	0	0	1			1
2007-09-24		D15-16	1	13:33:00	3	C	0	0	0	0	3			2			1
2007-10-22		D14	1	10:58:00	2	C	2	0	0	0	2			2
2007-10-22		D19	1	11:12:00	30	E	16	1	0	1	29	Y3YYRY		30
2007-10-22		D23	1	11:40:00	5	C	1	0	0	0	5			5
2007-10-22		D25	1	11:47:00	2	C	2	0	0	0	2			2
2007-10-05	21:46:00	D16	1	09:30:00	2	C	2	0	2	0	0			2
2007-10-27		D6	1	15:51:00	20	C	6	0	0	0	20			20
2007-10-30		D13-14	1	15:43:00	6	C	6	0	0	0	6			6
2007-10-30		D12-13	1	15:47:00	2	C	2	0	0	0	2			2
2007-10-30		D10	1	15:59:00	1	C	1	0	0	0	1			1
2007-10-30		D9	1	16:03:00	1	C	1	0	0	0	1
2007-10-30		D7	1	16:09:00	1	C	1	0	0	0	1			1
2007-10-30		D6-7	1	16:09:00	2	C	2	0	0	0	2			2
2007-09-27		D10	1	15:37:00	2	C	1	0	0	0	2		1	1
2007-09-27		D7	1	15:39:00	5	C	0	0	0	0	5		5
2007-09-27		D6-7	1	15:39:00	1	C	1	0	1	0	0			1
2007-09-10		D29-28	1	14:26:00	1	C	1	0	0	0	1			1
2007-09-10		D28-27	1	14:30:00	2	C	2	0	0	0	2			2
2007-09-10		D27-26	1	14:36:00	2	C	2	0	1	0	1			2
2007-09-10		D27-26	1	14:42:00	5	C	4	0	1	0	4			5
2007-09-10		D25-24	1	14:50:00	2	C	2	0	1	1	0			2
2007-09-10		D23-22	1	15:00:00	2	C	2	0	0	0	2			2
2007-09-10		D22	1	15:03:00	2	C	0	0	0	0	2			2
2007-09-10		D20-19	1	15:11:00	1	C	1	0	0	0	1			1
2007-09-10		D18-17	1	15:23:00	4	C	3	0	0	0	4			4
2007-10-21	21:34:00	D10	1	10:14:00	1	C	1	0	1	0	0			1
2007-10-23		D21	1	12:08:00	8	C	8	0	0	0	8			8
2007-10-23		D20	1	12:13:00	11	C	11	1	0	1	10	Y3YYRW	1	10
2007-10-23		D18	1	12:27:00	30	E	19	2	0	2	28	Y3YYWR, ?	22	8
2007-10-23		D15	1	12:48:00	15	C	5	0	0	0	15			15
2007-09-25		D29-30	1	13:57:00	2	C	0	0	0	0	2			2
2007-08-27		D17 (D15)	2	15:54:00	2	C	2	0			2						2
2007-08-27		D20	2	16:11:00	2		0	0			2						2
2007-09-05	08:15:00	D9	2	09:18:00	1	C	1	0	1	0	0			1
2007-09-05	20:34:00	D10-11	2	09:21:00	6	C	0	0	0	0	6						6
2007-09-05		D14	2	09:40:00	1	C	1	0	0	1	0			1
2007-09-07		D29	2	12:33:00	1	C	1	0	1	0	0			1
2007-09-07		D29	2	12:51:00	2	C	2	0	0	0	2			2		1
2007-09-09		Duin3	2	14:52:00	2	C	2	0	0	0	2		1		1
2007-09-09		Duin3	2	14:53:00	2	C	2	0	0	0	2			2
2007-09-09		Duin3	2	14:55:00	1	C	1	0	1	0	0			1
2007-09-09		Duin3-2	2	15:13:00	1	C	1	0	1	0	0			1
2007-09-08		Hut-duin3	2	13:52:00	1	C	1	0	1	0	0				1		1
2007-10-05		D30	2	10:20:00	2	C	2	0	2	0	0			2
2007-10-05		D28-29	2	10:20:00	1	C	1	0	1	0	0			1
2007-10-05		D30	2	10:24:00	3	C	3	0	0	0	3			3
2007-10-05		D29-30	2	10:28:00	2	C	2	0	2	0	0			2
2007-10-05		D30	2	10:30:00	2	C	2	0	2	0	0			2
2007-10-05		D30	2	10:35:00	2	C	0	0	0	0	2			2
2007-10-05		D28-29	2	10:39:00	2	C	0	0	0	0	2						2
2007-10-05		D28-29	2	10:41:00	2	C	2	0	2	0	0			2
2007-10-05		D27-28	2	10:53:00	2	C	2	0	1	1	0			2
2007-10-05		D27	2	11:01:00	2	C	2	0	1	0	1			2
2007-10-05		D26-17	2	11:06:00	3	C	0	0	0	0	0						3
2007-10-06		Duin2	2	11:01:00	1	C	1	0	1	0	0			1
2007-10-07	12:05:00	D12	2	13:11:00	8	C	7	0	0	0	8		1	6	1
2007-10-07		D16	2	13:27:00	2	C	2	0	1	0	1			2
2007-10-21		D18	2	10:46:00	4	C	4	0	0	0	4			4
2007-10-21		D25	2	11:10:00	4	C	4	0	2	0	2			4
2007-10-22		D23	2	11:56:00	6	C	6	0	0	0	6			6
2007-10-22		D13	2	12:26:00	3	C	0	0	0	0	3						3
2007-10-22		D12	2	12:30:00	12	C	12	0	0	0	12			12
2007-10-22		D7	2	12:50:00	30	C	1	1	0	1	29	Y3YYWR
2007-10-23		D8	2	13:11:00	27	C	27	1	0	1	26	Y3YYYR	7	20
2007-10-24		D6	2	14:18:00	75	C	22	1	0	1	74	Y3YY??		68	6
2007-10-24		D6	2	14:37:00	20	C	0	0	0	0	20						20
2007-10-24		D7	2	14:38:00	48	C	23	0	0	0	48			48
2007-10-24		D7-8	2	14:56:00	39	C	36	3	0	3	36	Y3YYRY, Y3YYRW, Y3YYYG	4	4	31
2007-09-24		D17-18	2	13:56:00	1	C	1	0	0	0	1			1
2007-08-27		D21-22	3	16:21:00	2		2	0	2	0	0						2
2007-08-27		D27-28	3	17:12:00	3	C	3	0	0	3	0			3
2007-08-29		D8-9	3	19:45:00	2	C	2	0	2	0	0			2
2007-09-04	07:26:00	D10-11	3	10:10:00	1	C	1	0	1	0	0			1
2007-09-04	19:56:00	D11-12	3	10:21:00	1	C	1	0	1	0	0			1
2007-09-05		D20-21	3	10:22:00	4	C	4	0	2	2	0			4
2007-09-05		D20-21	3	10:31:00	5	C	5	0	3	2	0						5
2007-09-05		D20-21	3	10:37:00	1	C	1	0	1	0	0			1
2007-09-05		D21-22	3	10:42:00	3	C	3	0	2	1				1	1		1
2007-09-05		D22-23	3	10:54:00	3	C	3	0	2	1	0			3			1
2007-09-05		D22-23	3	11:04:00	1	C	1	0	0	1	0			1
2007-09-07		D23	3	13:21:00	1	C	0	0	0	0	1			1
2007-09-07		D21-22	3	13:33:00	2	C	1	0	0	0	2			2
2007-09-07		D21-22	3	13:35:00	2	C	2	0	1	1	0			2
2007-09-07		D21-22	3	13:39:00	2	C	2	0	2	0	0			2
2007-09-08		Duin2	3	14:54:00	1	C	1	0	1	0	0			1
2007-09-08		duin1-vlag	3	15:07:00	1	C	1	0	1	0	0			1			1
2007-10-03	07:06:00	D13-14	3	09:30:00	0	C	0	0	0	0	0
2007-10-07		D15-16	3	14:20:00	15	E	0	0	0	0	15						15
2007-10-07		D11-12	3	14:34:00	1	C	1	0	1	0	0			1
2007-10-07		D11-12	3	14:40:00	2	C	2	0	2	0	0			2
2007-10-07		D11-12	3	14:46:00	1	C	1	0	1	0	0			1
2007-10-07		D10-11	3	14:58:00	3	C	2	0	0	0	3			3			3
2007-10-21		D20-21	3	11:55:00	3	C	3	0	0	0	3			3
2007-09-09		Reddingsboot-D1	3	15:36:00	1	C	1	0	1	0	0			1
2007-10-01	05:41:00	D10-11	3	09:18:00	2	C	2	0	1	0	1			2
2007-08-27		D21-20	4	18:15:00	4	C	4	0	1	3	0
2007-08-29		D12-13	4	20:10:00	2	C	2	0	2	0	0						2
2007-08-29		D13-14	4	20:13:00	1	C	1	0	0	0	1						1
2007-08-29		D15-16	4	20:13:00	2	C	2	0	0	0	2
2007-08-29		D16	4	20:18:00	1	C	1	0	1	0	0		1
2007-08-29		D13-14	4	20:31:00	4	C	0	0	0	0	4						4
2007-09-03	06:41:00	D26-25	4	09:52:00	2	C	2	0	0	0	2						2
2007-09-03	19:05:00	D24-25	4	10:01:00	1	C	1	0	1	0				1
2007-09-03		D23-24	4	10:09:00	1	C	1	0	0	1				1
2007-09-03		D23-24	4	10:13:00	2	C	2	0	0	2	0			2
2007-09-03			4	10:17:00	2	C	2	0	0	2	0						2
2007-09-03		D22-23	4	10:19:00	3	C	3	0	1	2	0			3
2007-09-03		D22-21	4	10:34:00	4	C	4	0	1	1	2			4
2007-09-03		D21	4	10:37:00	2	C	2	0	0	2	0		2		2
2007-09-04		D12-13	4	10:26:00	1	C	0	0	0	0	1						1
2007-09-04		D13-14	4	10:31:00	1	C	1	0	1	0	0			1
2007-09-04		D13-14	4	10:33:00	15	E	0	0	0	0	15						15
2007-09-04		D16-17	4	10:49:00	1	C	1	0	0	1	0					1
2007-09-04		D17-18	4	10:57:00	2	C	2	0	1	1	0			2
2007-09-04		D18-19	4	11:01:00	3	C	2	0	1	1	1			3			3
2007-09-04		D21-22	4	11:16:00	2	C	2	0	2	0	0			2
2007-09-04		D22-23	4	11:21:00	2	C	2	0	2	0	0			2
2007-09-05		D23-24	4	11:15:00	1	C	1	0	1	0	0			1
2007-09-05		D25-26	4	11:27:00	1	C	1	0	0	0	0			1
2007-09-05		D26-27	4	11:32:00	1	C	1	0	0	0	0			1
2007-09-05		D27	4	11:37:00	1	C	1	0	1	0	0			1
2007-09-05		D27-28	4	11:42:00	2	C	2	0	2	0	0			2
2007-09-05		D28-29	4	11:53:00	1	C	1	0	1	0	0			1
2007-09-05		D27-28	4	11:59:00	5	C	5	0	2	0	3			5
2007-09-22	09:40:00	Vliehors	4	13:30:00	3	C	0	0	0	0	3						3
2007-10-03	19:21:00	D27	4	10:17:00	3	C	3	0	1	2	0			3
2007-10-03		D28	4	10:43:00	2	C	2	0	0	0	2			2
2007-09-24		D20-21	4	15:15:00	1	C	1	0	0	0	1			1
2007-10-07		D8-9	4	15:07:00	1	C	1	0	0	0	1			1
2007-10-07		D9-10	4	15:13:00	2	C	2	0	0	0	2			2			2
2007-10-07		D9	4	15:14:00	2	C	1	0	1	0	1		2
2007-10-07		D8-9	4	15:16:00	2	C	2	0	0	0	2			2
2007-10-07		D8-9	4	15:19:00	4	C	4	0	0	0	4			4
2007-10-07		D9	4	15:26:00	1	C	1	0	0	0	1		1
2007-10-21		D15-16	4	12:24:00	2	C	2	0	2	0	0			2
2007-10-21		D13-14	4	12:33:00	2	C	2	0	2	0	0				2
2007-10-21		D10-11	4	12:41:00	1	C	1	0	0	0	1			1
2007-09-07		D10-11	4	14:12:00	1	C	1	0	1	0	0			1
2007-09-07		D9-10	4	14:17:00	1	C	1	0	1	0	0			1
2007-09-07		D7-8	4	14:22:00	1	C	1	0	1	0				1	1
2007-08-27		D19-D20	5	18:20:00	4	C	4	0	1	3	0		3	1(ju)
2007-09-03		D19-20	5	11:02:00	2	C	2	0	2	0	0			2			2
2007-09-03		D19-20	5	11:17:00	5	C	5	0	4	0	1			5
2007-09-03		D18-19	5	11:25:00	1	C	1	0	1	0	0			1
2007-09-03		D17-18	5	11:32:00	3	C	3	0	1	0	2			3
2007-09-04		D24-25	5	11:29:00	1	C	1	0	1	0	0			1
2007-09-04		D26-27	5	11:45:00	1	C	1	0	1	0	0			1
2007-09-04		D27-28	5	11:49:00	5	C	5	0	5	0	0			5
2007-09-05		D20-21	5	12:24:00	6	C	6	0	3	3	0			6
2007-09-05		D20-21	5	12:25:00	2	C	2	0	2	0	0				2
2007-09-05		D7-8	5	12:58:00	1	C	1	0	1	0	0			1
2007-09-22	22:05:00	Vliehors zuidkant hutje	5	14:55:00	1	C	0	0	0	0	1						1
2007-09-22		Zuid hutje-duin	5	15:15:00	7	C	7	0	0	0	7			7
2007-10-03		D14	5	11:28:00	1	C	1	0	0	0	1			1
2007-10-03		D14-15	5	11:28:00	1	C	1	0	0	0	1			1
2007-10-03		D12-13	5	11:37:00	2	C	2	0	0	0	2			2
2007-10-03		D8-9	5	11:47:00	2	C	2	0	0	0	2			2
2007-10-03		D6-8	5	11:50:00	4	C	4	0	4	0	0			4
2007-10-03		D6-8	5	11:53:00	1	C	0	0	0	0	1			1
2007-10-31	05:05:00		5	09:30:00		strand op
2007-10-31	17:15:00	D6-8	5	09:37:00	5	C	5	0	0	0	5			4
2007-10-31		D8	5	09:56:00	2	C	2	0	0	0	2			2
2007-10-31		D8-9	5	10:01:00	2	C	2	0	0	0	2			2
2007-10-31		D9	5	10:01:00	1	C	1	0	0	0	1			1
2007-10-01	18:01:00	D10-11	5	09:44:00	3	C	3	0	2	0	1			3
2007-10-01		D10-11	5	09:57:00	1	C	1	0	1	0	0			1
2007-10-01		D11	5	09:57:00	3	C	3	0	2	0	1			3
2007-10-01		D11-12	5	10:00:00	1	C	1	0	0	0	1			1
2007-10-01		D12-13	5	10:08:00	9	C	9	0	9	0	0			9
2007-10-01		D12-13	5	10:09:00	5	C	5	0	5	0	0						5
2007-10-01		D13-14	5	10:11:00	4	C	4	0	0	0	4			4
2007-10-01		D14-15	5	10:15:00	5	C	5	0	5	0	0			5
2007-10-01		D18-19	5	10:33:00	1	C	0	0	0	0	0						1
2007-10-01		D20-21	5	10:40:00	1	C	1	0	0	0	1			1
2007-10-02	18:41:00	D4	5	11:11:00	2	C	2	0	0	0	2		1	1			2
2007-10-02		D4-6	5	11:12:00	2	C	2	0	0	0	2			2
2007-10-02		D4	5	11:16:00	1	C	1	0	0	0	1		1
2007-10-02		D4-6	5	11:19:00	2	C	2	0	0	0	2			2
2007-08-28	laag 2:31	reddingsbootp.-dam	6	09:00:00	7	C	7	0	0	0	7			7
2007-08-30	03:56:00	Reddinsbootp-D1	6	08:58:00	2	C	2	0	1	0	1			2
2007-08-30	16:28:00	Reddinsbootp-D1	6	09:17:00	2	C	2	0	2	0	0			2
2007-08-30		Reddinsbootp-D1	6	09:28:00	1	C	1	0	1	0	0			1
2007-08-30		Reddinsbootp-D1	6	09:32:00	1	C	0	0	0	0	1						1
2007-08-30		Reddinsbootp-D1	6	09:34:00	2	C	2	0	2	0	0			2
2007-08-30		Reddinsbootp-D1	6	09:44:00	1	C	1	0	0	0	1			1			1
2007-08-30		Reddinsbootp-D1	6	09:53:00	1	C	1	0	1	0	0			1
2007-09-03		D16-17	6	11:44:00	10	E	0	0	0	0	10						10
2007-09-03		D14-15	6	11:49:00	3	C	3	0	2	1	0			3
2007-09-03		D13-14	6	11:56:00	4	C	4	0	4	0	0			4
2007-09-03		D11-12	6	12:03:00	6	C	6	0	4	0	2			2	2	2
2007-09-03		D11-12	6	12:11:00	1	C	1	0	1	0	0			1
2007-10-01		D22	6	10:45:00	12	C	10	0	0	0	11		11		1
2007-10-02		D1-4	6	11:30:00	6	C	6	0	6	0	0			6
2007-10-02		D1-4	6	11:31:00	6	C	6	0	6	0	0						6
2007-10-02		D1-reddinsbootp.	6	11:54:00	3	C	3	0	0	0	3			3
2007-10-02		Reddingsboot-vlag	6	12:08:00	1	C	1	0	0	0	1			1
2007-10-04	08:06:00		6	13:20:00
2007-10-04	20:15:00	D6-8	6	13:22:00	3	C	1	0	0	0	3			1			2
2007-10-04		D11	6	13:35:00	16	C	16	0	16	0	0		16
2007-10-04		D11	6	13:37:00	16	C	16	0	16	0	0						16
2007-10-04		D10-11	6	13:38:00	1	C	1	0	0	0	1			1
2007-10-04		D12	6	13:41:00	1	C	1	0	1	0	0			1
2007-10-04		D16	6	14:01:00	18	C	14	0	18	0	0		13	5
2007-10-29	03:39:00		6	08:48:00
2007-10-29	15:56:00	D6	6	08:48:00	24	C	17	1	0	1	23	Y3YYWG	21		3
2007-10-29		D6-7	6	08:56:00	45	C	45	2	0	2	43	Y3YYWG, Y3YY??	45
2007-10-29		D7-8	6	08:57:00	2	C	2	0	0	0	2			2
2007-10-29			6	09:00:00
2007-10-31		D9-10	6	10:11:00	3	C	3	0	0	0	3
2007-10-31		D10-11	6	10:23:00	2	C	2	1	0	1	1	Y3YYWR		2
2007-10-31		D11-12	6	10:30:00	4	C	4	0	0	0	4			4
2007-10-31		D12-13	6	10:37:00	3	C	3	0	0	0	3			3
2007-10-31		D13-14	6	10:37:00	3	C	3	0	0	0	3			3
2007-10-31		D14-15	6	10:41:00	2	C	2	0	0	0	2			2
2007-10-31		D15-16	6	10:47:00	3	C	3	0	0	0	3			1
2007-10-31		D16-17	6	10:52:00	3	C	3	1	0	1	2	Y3YYRY		3
2007-10-31		D17-18	6	11:03:00	3	C	3	0	0	0	3			3
2007-10-31		D18	6	11:03:00	1	C	1	0	0	0	1			1
2007-08-28	laag 15:02	reddingsbootp.-dam	-6	09:05:00	1	C	1	0	0	1	0			1
2007-08-28		reddingsbootp.-dam	-6	09:15:00	4	C	4	0	4	0	0			4
2007-08-28		reddingsbootp.-dam	-6	09:29:00	10	C	10	0	4	4	2			10
2007-08-28		reddingsbootp.-dam	-6	09:37:00	3	C	1	0	0	3				1			2
2007-08-28		reddingsbootp.-dam	-6	09:46:00	9	C	9	0	3	4	2			9
2007-08-28		reddingsbootp.-dam	-6	09:54:00	1	C	1	0	1	0	0			1
2007-08-30		Reddinsbootp-D1	-6	10:10:00	4	C	4	0	4	0	0			4			1
2007-08-30		Reddinsbootp-D1	-6	10:14:00	4	C	4	0	4	0				4
2007-08-30		D1	-6	10:19:00	1	C	1	0	1	0	0			1
2007-08-30		Reddingsboot-D1	-6	10:24:00	4	C	4	0	4	0	0			4			4
2007-08-30		D1-2	-6	10:30:00	1	C	1	0	1	0	0			1
2007-08-30		D6-7	-6	10:44:00	2	C	2	0	2	0	0			2
2007-08-30		D6-7	-6	10:47:00	3	C	3	0	3	0			2		1
2007-08-30		D6-7	-6	10:52:00	2	C	2	0	2	0	0			2
2007-08-30		D6-7	-6	10:52:00	2	C	2	0	2	0							2
2007-09-07		D5-6	-6	17:35:00	1	C	1	0	0	1	0			1	1
2007-09-07		D4-5	-6	17:43:00	1	C	1	0	1	0				1
2007-09-07		D4-5	-6	17:47:00	3	C	3	0	3	0	0			3
2007-09-07		D4-1	-6	17:54:00	1	C	1	0	1	0	0			1
2007-09-07		Reddingsbootp-DB	-6	18:11:00	3	C	3	0	0	0	3			3			3
2007-09-11	02:37:00		-6	09:22:00
2007-09-27	15:21:00	D9-10	-6	10:14:00	1	C	1	0	1	0	0			1
2007-10-01		D28-29	-6	11:59:00	1	C	1	0	1	0	0			1
2007-10-01		D27-28	-6	12:17:00	2	C	2	0	2	0	2			2
2007-10-01		D27	-6	12:23:00	4	C	4	0	0	0	4		2		2
2007-10-01		D27	-6	12:25:00	4	C	4	0	0	0	4		1		3
2007-10-01		D21	-6	12:56:00	12	C	11	0	0	0	12		10	1	1
2007-10-01		D20-21	-6	12:56:00	6	C	6	1	5	1	0	Y3YYWR	1	5
2007-10-02		reddingsboot-D1	-6	12:31:00	1	C	1	0	0	0	1			1
2007-10-02		D6	-6	13:07:00	13	C	9	0	0	0	13		12		1
2007-10-02		D6	-6	13:12:00	13	C	9	0	0	0	13						13
2007-10-02		D8	-6	13:17:00	10	C	7	0	0	0	10		10
2007-10-02		D9	-6	13:25:00	11	C	11	0	0	0	11		11
2007-10-26	02:15:00	D6-7	-6	09:04:00	69	C	69	2	0	2	67	?,?					69
2007-10-26	14:48:00	D6	-6	09:07:00	34	C	34	2	0	2	32	Y3YYRW, Y3YYWW		34
2007-10-26		D6-7	-6	09:09:00	14	C	14	0	0	0	14		8	6
2007-10-26		D8-9	-6	09:39:00	1	C	0	0	0	0	1						1
2007-10-26		D11-12	-6	09:45:00	2	C	2	0	0	0	2			2
2007-10-04		D28	-6	14:33:00	1	C	1	0	0	0	1			1
2007-10-04		D28	-6	14:54:00	1	C	1	0	0	0	1			1
2007-10-31		D18-19	-6	11:07:00	2	C	2	0	0	0	2			2
2007-10-31		D19-20	-6	11:11:00	2	C	2	0	0	0	2			2
2007-10-31		D20	-6	11:11:00	4	C	4	0	0	0	4		2	1
2007-10-31		D20-21	-6	11:17:00	2	C	2	0	0	0	2			2
2007-10-31		D21-22	-6	11:22:00	3	C	3	0	0	0	3			2	1
2007-10-31		D22	-6	11:28:00	9	C	4	0	0	0	9		9
2007-10-31		D22-23	-6	11:29:00	1	C	1	0	0	0	1			1
2007-10-31		D25-26	-6	11:53:00	3	C	3	0	0	0	3			3
2007-10-31		D26-27	-6	11:59:00	2	C	2	0	0	0	2			2
2007-10-31		D27-28	-6	12:03:00	2	C	0	0	0	0	2			2			2
2007-08-28		reddingsbootp.-dam	-5	10:03:00	2	C	2	0	2	2	0			4
2007-08-28		reddingsbootp.-dam	-5	10:10:00	3	C	3	0	3	0	0			5
2007-08-28		D5-D6	-5	10:27:00	4	C	4	0	4	0	0			4
2007-08-28		D5-6	-5	10:49:00	3	C	3	0	1	2	0			3
2007-08-28		D6-7	-5	10:06:00	8	C	8	0	6	2	0			8
2007-08-28		D5-6	-5	10:20:00	5	C	5	0	2	3	0			5
2007-08-28		D5-6	-5	10:22:00	3	C	3	0	3	0	0		3
2007-08-28		D5-6	-5	10:27:00	7	C	0	0	0	0	7						7
2007-08-28		D5-6	-5	10:29:00	7	C	0	0	0	0	7						7
2007-08-29	03:16:00	Reddinsbootp-dam	-5	10:59:00	10	C	10	0	9	1	0		6	3	1
2007-08-29	15:49:00	Reddinsbootp-dam	-5	11:12:00	24	C	24	0	23	1	0		2	3		19
2007-08-30		D6-7	-5	10:54:00	2	C	2	0	2	0	0			2
2007-08-30		D6-7	-5	10:56:00	1	C	1	0	1	0	0			1
2007-08-30		D7-8	-5	10:59:00	2	C	2	0	2	0	0			2
2007-08-30		D7-8	-5	11:06:00	1	C	1	0	1	0	0			1
2007-08-30		D7-8	-5	11:08:00	2	C	2	0	2	0	0			2
2007-08-30		D9-10	-5	11:15:00	4	C	4	0	4	0	0			4
2007-08-30		D11-12	-5	11:32:00	7	C	7	0	6	0	1			7
2007-08-30		D12-13	-5	11:36:00	2	C	2	0	2	0	0			2
2007-08-30		D13-14	-5	11:43:00	4	C	4	0	0	0	4			4
2007-08-30		D13-14	-5	11:45:00	1	C	1	0	1	0	0			1
2007-09-09	00:55:00	reddingsbootp-vlag	-5	09:18:00	1	C	1	0	1	0	0		1
2007-09-09	13:35:00	reddingsbootp-vlag	-5	09:21:00	2	C	2	0	2	0	0			2
2007-09-09		reddingsbootp-vlag	-5	09:29:00	4	C	4	0	4	0	0			4			4
2007-09-11	15:06:00	D9-10	-5	09:38:00	2	C	0	0	0	0	2						2
2007-09-11		D11-12	-5	09:45:00	2	C	2	0	0	0	2			2			2
2007-09-11		D12-13	-5	09:49:00	1	C	1	0	1	0	0			1			1
2007-09-11		D14-15	-5	09:59:00	7	C	7	0	0	0	7		2	3	2
2007-09-11		D14-15	-5	10:00:00	7	C	7	0	0	0	7			7
2007-09-11		D14-15	-5	10:02:00	7	C	7	0	0	0	7						7
2007-09-11		D18-19	-5	10:16:00	8	E	7	0	0	0	8			8			5
2007-09-11		D18-19	-5	10:21:00	4	C	4	0	0	0	4			4
2007-09-11		D19-20	-5	10:27:00	3	C	3	0	0	0	3			3
2007-09-11		D19-20	-5	10:27:00	2	C	0	0	0	0	2						2
2007-09-11		D20-21	-5	10:27:00	7	C	7	0	0	0	7			7
2007-09-11		D21-22	-5	10:33:00	10	C	9	0	2	0	8			9	1
2007-09-12	15:46:00	reddingsboot-D1	-5	11:39:00	2	C	2	0	0	0	2			2
2007-09-10	01:51:00	Dam 6	-5	09:51:00
2007-09-25	01:11:00	D19-20	-5	09:26:00	40	C	0	0	0	0	40			40
2007-09-25	13:46:00	D21-22	-5	09:29:00	12	C	0	0	0	0	12			12
2007-09-26	02:06:00	D19-20	-5	09:50:00	11	C	0	0	0	0	10			1			10
2007-09-26	14:35:00	D20-21	-5	09:56:00	9	C	9	0	0	0	9			9
2007-09-26		D21-22	-5	09:58:00	7	C	7	0	0	0	7			7
2007-09-26		D21-22	-5	10:04:00	6	C	0	0	0	0	6			6
2007-09-26		D20-21	-5	10:13:00	10	C	0	0	0	0	10			10
2007-09-26		D18-19	-5	10:31:00	8	C	7	0	0	0	7			7			1
2007-09-27		D13-14	-5	10:32:00	3	C	3	0	3	0	0			3
2007-09-27		D14-15	-5	10:33:00	3	C	3	0	3	0	0		1		2
2007-09-27		D14-15	-5	10:41:00	5	C	5	0	1	0	4			5
2007-09-27		D16-17	-5	10:48:00	1	C	0	0	0	0	1						1
2007-09-27		D17-18	-5	10:51:00	1	C	1	0	0	0	1			1
2007-09-27		D17-18	-5	10:56:00	2	C	2	0	2	0	2			2
2007-10-01		D20-21	-5	13:01:00	1	C	1	1	0	1	0	Y3YYWR			1
2007-10-01		D19-20	-5	13:04:00	4	C	0	0	0	0	4						4
2007-10-01		D16-17	-5	13:17:00	1	C	1	0	0	0	1			1
2007-10-01		D16	-5	13:21:00	7	C	7	0	0	0	7		5	1	1
2007-10-01		D16	-5	13:22:00	7	C	7	0	0	0	7		2	5
2007-10-01		D11-12	-5	13:33:00	2	C	2	0	2	0	0			1			1
2007-10-01		D10-11	-5	13:38:00	4	C	0	0	0	0	2						4
2007-10-02		D16	-5	13:47:00	4	C	4	0	0	0	4		1	3
2007-10-02		D16	-5	13:49:00	2	C	2	0	0	0	2			2
2007-10-02		D17	-5	13:53:00	3	C	3	0	3	0	0			3
2007-10-02		D20-21	-5	14:12:00	4	C	4	0	0	0	4			4
2007-10-02		D20	-5	14:24:00	11	C	11	0	0	0	11			11
2007-10-02		D19-20	-5	14:24:00	1	C	1	0	0	0	1			1
2007-10-02		D20-21	-5	14:37:00	3	C	3	0	3	0	0			3
2007-10-02		D21-22	-5	14:41:00	1	C	1	0	0	0	1			1
2007-10-06		Hut	-5	17:23:00	6	C	6	0	0	0	6			6
2007-10-06		Hut-duin3	-5	17:35:00	2	C	2	0	2	0	0			2
2007-10-04		D23	-5	15:08:00	2	C	2	0	0	0	2		2
2007-10-04		D17	-5	15:39:00	4	C	4	0	0	0	4			4
2007-10-04		D16	-5	15:49:00	5	C	3	0	5	0	0		5
2007-10-04		D15	-5	15:53:00	2	C	2	0	0	0	2		1	1
2007-10-04		D14	-5	15:57:00	6	C	6	0	0	0	6		1	5
2007-10-04		D14	-5	16:02:00	6	C	6	0	0	0	6			2	4
2007-10-25	14:00:00	D6-7	-5	09:41:00	26	C	26	1	0	1	25	Y3YYWG	21		5
2007-10-25		D6-7	-5	09:47:00	5	C	5	2	0	2	3	Y3YYWG, Y3YYYG		5
2007-10-26		D11-12	-5	09:53:00	9	C	9	0	0	0	9			9
2007-10-26		D7-9	-5	10:10:00	16	C	16	0	0	0	16			16
2007-10-26		D7-8	-5	10:18:00	6	C	6	0	0	0	6			6
2007-10-26		D6-7	-5	10:35:00	22	C	22	0	0	0	22		7	15
2007-10-26		D6	-5	10:41:00	4	C	4	1	0	1	3	Y3YYWG		4
2007-10-31		D28-29	-5	12:09:00	2	C	2	0	0	0	2			2
2007-10-31		D27-28	-5	12:12:00	2	C	2	0	0	0	2			2
2007-10-31		D25-26	-5	12:19:00	2	C	2	0	0	0	2			2
2007-10-31		D23-24	-5	12:28:00	2	C	2	0	0	0	2			2
2007-10-31		D22	-5	12:36:00	37	C	28	0	0	0	37		27	9	1
2007-10-31		D21-22	-5	12:40:00	1	C	1	0	0	0	1			1
2007-10-31		D21	-5	12:40:00	13	C	10	1	0	1	12	Y3YY??	13
2007-10-31		D20-21	-5	12:50:00	9	C	9	0	0	0	9			9
2007-10-31		D20	-5	12:53:00	7	C	7	0	0	0	7			7
2007-10-31		D19-20	-5	12:59:00	1	C	1	0	0	0	1			1
2007-10-31		D18-19	-5	13:02:00	5	C	5	0	0	0	5			3
2007-08-28		D6-7	-4	11:28:00	2	C	2	0	2	0	0			2
2007-08-28		D7-8	-4	11:34:00	3	C	3	0	2	1	0			3
2007-08-28		D9-10	-4	11:47:00	9	C	9	0	0	0	9		1	8
2007-08-28		D9-10	-4	11:47:00	6	C	6	0	0	0	6						6
2007-08-29		Reddinsbootp-dam	-4	11:24:00	4	C	4	0	4	0	0		2	2
2007-08-29		Reddinsbootp-dam	-4	11:35:00	5	C	5	0	3	2	0
2007-08-29		Reddinsbootp-dam	-4	11:40:00	7	C	7	0	7	0	0		4	1	2
2007-08-29		Reddinsbootp-dam	-4	11:49:00	6	C	6	0	5	1	0		3		3
2007-08-30		D13-14	-4	11:55:00	2	C	2	0	2	0	0			2
2007-08-30		D14	-4	12:09:00	1	C	1	0	1	0				1
2007-08-30		D14-15	-4	12:09:00	3	C	0	0	0	0	3						3
2007-08-30		D14-15	-4	12:10:00	2	C	2	0	2	0				2			2
2007-08-30		D14-15	-4	12:26:00	2	C	2	0	2	0	0			2
2007-08-30		D15-16	-4	12:28:00	5	C	2	0	2	0	3						5
2007-08-30		D16-17	-4	12:33:00	2	C	2	0	0	0	2			2	2
2007-08-30		D16-17	-4	12:46:00	4	C	4	0	4	0	0			4
2007-08-30		D18-19	-4	12:53:00	1	C	1	0	0	1	0			1
2007-09-08		Reddingsbootp-vlag	-4	08:47:00	4	C	4	0	0	0	4			4
2007-09-08		Vlag-duin1	-4	08:50:00	11	C	11	0	0	0	11			11
2007-09-08		Vlag-duin1	-4	08:57:00	7	C	7	0	4	3	0			6	1
2007-09-08		Vlag-duin1	-4	08:58:00	7	C	7	0	4	3	0			7
2007-09-08		Vlag-duin1	-4	08:59:00	1	C	1	0	0	1	0			1
2007-09-08		Vlag-duin1	-4	09:01:00	2	C	2	0	0	0	2			2
2007-09-08		Vlag-duin1	-4	09:01:00	3	C	3	0	0	0	3				3
2007-09-08		Vlag-duin1	-4	09:04:00	1	C	1	0	0	0	1			1
2007-09-08		Vlag-duin1	-4	09:06:00	1	C	1	0	0	1				1
2007-09-08		Vlag-duin1	-4	09:08:00	1	C	1	0	0	1				1
2007-09-08		Vlag-duin1	-4	09:15:00	8	C	8	0	1	0	7			8
2007-09-08		Vlag-duin1	-4	09:17:00	2	C	2	0	2	0	0			2
2007-09-08		Vlag-duin1	-4	09:21:00	3	C	2	0	0	0	3			1			2
2007-09-08		Vlag-duin1	-4	09:25:00	18	C	18	0	3	0	15			14	2
2007-09-08		Vlag-duin1	-4	09:26:00	2	C	2	0	0	0	2						2
2007-09-08		Duin2	-4	09:29:00	5	C	5	0	0	0	5			5
2007-09-09		reddingsbootp-vlag	-4	09:35:00	2	C	2	0	2	0	0			2
2007-09-09		reddingsbootp-vlag	-4	09:41:00	1	C	1	0	1	0	0			1
2007-09-09		reddingsbootp-vlag	-4	09:45:00	1	C	0	0	0	0	1			1			1
2007-09-09		reddingsbootp-vlag	-4	09:51:00	2	C	2	0	2	0	0			2
2007-09-09		reddingsbootp-vlag	-4	09:54:00	3	C	3	0	0	2	1			3
2007-09-09		reddingsbootp-vlag	-4	10:03:00	2	C	2	0	1	0	1			2
2007-09-09		reddingsbootp-vlag	-4	10:09:00	5	C	5	0	1	4	0			3	2
2007-09-09		reddingsbootp-vlag	-4	10:13:00	4	C	0	0	0	0	4						4
2007-09-09		reddingsbootp-vlag	-4	10:15:00	1	C	1	0	1	0	0			1
2007-09-09		Vlag-duin1	-4	10:19:00	2	C	2	0	1	1	0			2
2007-09-09		Vlag-duin1	-4	10:21:00	5	C	5	0	3	1	1			4	1
2007-09-09		Vlag-duin1	-4	10:31:00	2	C	2	0	0	1	1			2
2007-09-10	14:26:00	D6-7	-4	10:01:00	5	C	5	0	0	0	5			5
2007-09-10		D6-7	-4	10:10:00	14	C	14	1	0	1	0	Y3YYWW		14
2007-09-10		D6-7	-4	10:15:00	13	C	13	1	0	1	12	Y3YYWW					13
2007-09-11		D22-23	-4	10:45:00	4	C	4	0	0	0	4			4
2007-09-11		D23-24	-4	10:53:00	2	C	2	0	1	0	1			1	1
2007-09-11		D24-25	-4	11:00:00	1	C	1	0	0	0	1			1
2007-09-11		D25-26	-4	11:17:00	4	C	4	0	1	0	3			4
2007-09-11		D25-26	-4	11:20:00	4	C	4	0	1	0	3		1	3
2007-09-11		D26-27	-4	11:21:00	1	C	1	0	1	0	0			1
2007-09-11		D27-28	-4	11:25:00	1	C	1	0	0	1	0			1
2007-09-11		D27-28	-4	11:27:00	2	C	2	0	0	0	2			2
2007-09-11		D29-30	-4	11:34:00	1	C	1	0	0	0	1			1
2007-09-12		reddingsboot-D1	-4	11:52:00	1	C	1	0	1	0	0			1
2007-09-12		reddingsboot-D1	-4	11:58:00	1	C	1	0	1	0	0			1
2007-09-12		DB-DA	-4	12:11:00	1	C	1	0	0	0	1			1
2007-09-12		D4-6	-4	12:27:00	2	C	2	0	0	0	2			2
2007-09-12		D6	-4	12:30:00	3	C	3	0	0	0	3			3
2007-09-12		D6-7	-4	12:33:00	1	C	1	0	0	0	1			1
2007-09-12		D10-11	-4	12:44:00	2	C	2	0	1	0	1			2
2007-09-13	03:51:00	reddingsbootp-vlag	-4	12:57:00	5	C	5	0	2	0	3			5
2007-09-24	00:05:00	D6-8	-4	09:19:00	9	C	5	0	0	0	9			9
2007-09-24	12:55:00	D8-9	-4	09:34:00	1	C	1	0	0	0	1			1
2007-09-25		D22-23	-4	09:53:00	3	C	3	0	0	0	3			3			2
2007-09-25		D23-24	-4	10:19:00	1	C	0	0	0	0	1						1
2007-09-26		D17-18	-4	10:45:00	5	C	5	0	0	0	5			5
2007-09-26		D16-17	-4	11:00:00	3	C	0	0	0	0	3			2	1
2007-09-26		D15-16	-4	11:15:00	6	C	0	0	0	0	6			5	1
2007-09-26		D14-15	-4	11:30:00	2	C	0	0	0	0	2			2
2007-09-27		D17-18	-4	11:25:00	4	C	4	0	2	0	2			4
2007-09-27		D18-19	-4	11:32:00	2	C	2	0	2	0	0			2
2007-09-27		D20	-4	11:50:00	3	C	3	0	0	0	3		3
2007-09-27		D20-21	-4	12:04:00	5	C	5	0	4	0	1			5
2007-09-27		D20	-4	12:07:00	8	C	8	0	0	0	8			8
2007-09-27		D21	-4	12:11:00	2	C	2	0	0	0	2			2
2007-09-27		D21-22	-4	12:14:00	2	C	2	0	2	0	0			2
2007-09-27		D22	-4	12:20:00	1	C	1	0	1	0	0			1
2007-09-27		D22-23	-4	12:20:00	1	C	1	0	0	0	1			1
2007-10-02		D22-23	-4	14:45:00	1	C	1	0	0	0	1			1
2007-10-02		D26-27	-4	14:57:00	2	C	2	0	1	0	1			2
2007-10-02		D27-28	-4	15:02:00	2	C	2	0	1	0	1			2
2007-10-02		D28-29	-4	15:08:00	1	C	1	0	1	0	1			1
2007-10-02		D27-28	-4	15:20:00	1	C	1	0	0	1	0			1
2007-10-02		D26-27	-4	15:32:00	1	C	1	0	0	0	1			1
2007-10-04		D12	-4	16:09:00	4	C	4	0	3	0	1			4
2007-10-04		D11-12	-4	16:10:00	2	C	2	0	0	0	2			2
2007-10-04		D8-9/D8	-4	16:26:00	2	C	2	0	0	0	2			2
2007-10-06		Duin2-3	-4	17:49:00	1	C	1	0	1	0	1			1
2007-10-06		Duin2-3	-4	17:52:00	1	C	1	0	1	0	0			1
2007-10-06		Duin2	-4	18:00:00	2	C	2	0	2	0	0			2
2007-10-06		Duin1-2	-4	18:03:00	3	C	3	0	0	0	3			3
2007-10-06		Vlaggen	-4	18:16:00	4	C	4	0	4	0	0			4
2007-10-08	13:10:00	D6	-4	09:32:00	28	C	28	1	0	0	28			28
2007-10-08		D4-6	-4	09:30:00	2	C	2	0	2	0	0			2
2007-10-08		D4-6	-4	09:31:00	18	C	0	0	0	0	18			16	2
2007-10-08		D4-6	-4	09:40:00	14	C	14	0	0	0	14			13	1
2007-10-08		D4	-4	09:42:00	17	C	17	0	10	0	7		2	15
2007-10-08		D4	-4	09:46:00	1	C	1	1	0	1	0	Y3YYWR
2007-10-08		D4-6	-4	10:02:00	3	C	3	0	0	0	3			3
2007-10-24	13:16:00	D6	-4	09:19:00	26	C	0	0	0	0	26		21	7
2007-10-24		D6	-4	09:23:00	26	C	0	0	0	0	26						26
2007-10-24		D12-13	-4	09:43:00	37	C	37	1	0	1	36	Y3YYRW	23	11	3
2007-10-24		D12-13	-4	09:47:00	37	C	37	1	0	1	36	Y3YYRW					37
2007-10-24		D14	-4	10:00:00	4	C	4	0	0	0	4			4
2007-10-25		D6-7	-4	10:00:00	1	C	1	1	0	1	0	Y3YYWW	1
2007-10-25		D4-6	-4	10:03:00	3	C	3	0	0	0	3			3
2007-10-25		D7-8	-4	10:10:00	49	C	49	1	0	1	48	Y3YYWG	49
2007-10-25		D11-12	-4	10:37:00	23	C	3	0	0	0	23			3			20
2007-10-25		D12-13	-4	10:42:00	5	C	5	0	5	0	0			5			5
2007-10-25		D12	-4	10:44:00	15	C	15	0	5	0	10			15
2007-10-25		D16-17	-4	10:56:00	9	C	9	0	0	0	9			9
2007-10-27	15:36:00	D4-6	-4	11:54:00	1	C	1	0	0	0	1			1
2007-10-27		D6-7	-4	11:55:00	7	C	7	0	0	0	7			7
2007-10-27		D7-8	-4	11:57:00	6	C	6	0	0	0	6			6
2007-10-27		D8-9	-4	12:06:00	6	C	6	0	0	0	6			5
2007-10-27		D9-10	-4	12:13:00	6	C	6	0	0	0	6			5
2007-10-27		D10-11	-4	12:18:00	5	C	5	0	0	0	5			5
2007-10-27		D11-12	-4	12:22:00	9	C	9	0	0	0	9			8
2007-10-27		D12	-4	12:22:00	4	C	4	0	0	0	4			4
2007-10-27		D12-13	-4	12:27:00	11	C	11	0	0	0	11			8	3
2007-10-27		D13	-4	12:32:00	4	C	4	0	0	0	4			4
2007-10-27		D13-14	-4	12:33:00	2	C	2	0	0	0	2			2
2007-10-29		D6-8	-4	12:38:00	15	C	15	0	0	0	15			15
2007-10-29		D6	-4	12:38:00	2	C	2	0	0	0	2			2
2007-10-29		D6-8	-4	12:45:00	1	C	1	1	0	1	0	Y3YYYG		1
2007-10-30	16:42:00	D10-11	-4	11:52:00	17	C	10	2	0	2	15	Y3YYWG, Y3YYYG		17
2007-10-31		D18	-4	13:07:00	17	C	17	1	0	1	16	Y3YYWR	1	16
2007-10-31		D17-18	-4	13:08:00	7	C	7	0	0	0	7			7
2007-10-31		D17	-4	13:13:00	5	C	5	0	0	0	5			4	1
2007-10-31		D16-17	-4	13:14:00	3	C	3	0	0	0	3			3
2007-10-31		D16	-4	13:19:00	3	C	3	0	0	0	3			3
2007-10-31		D14-15	-4	13:23:00	1	C	1	0	0	0	1			1
2007-10-31		D14	-4	13:26:00	14	C	14	1	0	1	13	Y3YYWG		14
2007-10-31		D13-14	-4	13:27:00	2	C	2	0	0	0	2			2
2007-10-31		D12-13	-4	13:32:00	2	C	2	0	0	0	2			2
2007-10-31		D11-12	-4	13:38:00	2	C	2	0	0	0	2			2
2007-10-31		D10-11	-4	13:44:00	1	C	1	0	0	0	1			1
2007-10-31		D9-10	-4	13:48:00	2	C	2	0	0	0	2			2
2007-10-31		D9	-4	13:48:00	1	C	1	0	0	0	1				1
2007-10-31		D8-9	-4	13:51:00	2	C	2	0	0	0	2			2
2007-10-31		D6-8	-4	14:01:00	9	C	9	0	0	0	9			9
2007-08-28		D11-12	-3	12:04:00	3	C	3	0	2	1	0		2	1
2007-08-28		D13-14	-3	12:52:00	1	C	1	0	1	0	0			1
2007-08-28		D14-15	-3	12:58:00	1	C	1	0	0	0	1						1
2007-08-28		D15	-3	13:00:00	1	C	1	0	0	1	0		1
2007-08-30		D18-19	-3	12:55:00	1	C	1	0	1	0	0			1
2007-08-30		D19-20	-3	13:05:00	3	C	3	0	0	3	0			3
2007-08-30		D19-20	-3	13:08:00	1	C	1	0	0	1	0			1
2007-08-30		D19-20	-3	13:09:00	1	C	1	0	1	0	0			1
2007-09-08		Duin2-3	-3	09:32:00	8	C	7	0	0	0	8			8
2007-09-08		Duin2-3	-3	09:35:00	2	C	2	0	0	0	2			2
2007-09-08		Duin2-3	-3	09:38:00	2	C	2	0	1	1	0			2
2007-09-08		Duin2-3	-3	09:41:00	7	C	7	0	0	0	7			7
2007-09-08		Duin2-3	-3	09:44:00	2	C	0	0	0	0	2						2
2007-09-08		duin3-hut	-3	09:47:00	1	C	1	0	1	0	0			1
2007-09-08		duin3-hut	-3	09:54:00	10	C	10	0	3	3	4			10
2007-09-08		duin3-hut	-3	09:59:00	5	C	5	0	0	2	3			4	1
2007-09-08		duin3-hut	-3	10:02:00	2	C	2	0	0	0	2			2
2007-09-08		duin3-hut	-3	10:05:00	8	C	8	0	3	2	0			6	2
2007-09-08		duin3-hut	-3	10:07:00	1	C	1	0	0	1	0				1		1
2007-09-08		duin3-hut	-3	10:11:00	4	C	1	0	1	0	3			4			4
2007-09-08		duin3-hut	-3	10:14:00	2	C	2	0	1	1	0			2
2007-09-08		duin3-hut	-3	10:17:00	2	C	2	0	1	0	1			2
2007-09-08		Hut-westpunt	-3	10:19:00	1	C	1	0	0	1	0			1
2007-09-08		Hut-westpunt	-3	10:21:00	1	C	1	0	0	0	1			1
2007-09-09		Vlag-duin1	-3	10:37:00	2	C	2	0	0	0	2			2
2007-09-09		Vlag-duin1	-3	10:46:00	1	C	1	0	0	1	0			1
2007-09-09		Duin1-2	-3	10:56:00	2	C	2	0	1	0	1			2
2007-09-09		Duin1-2	-3	11:01:00	12	C	12	0	2	3	7			12
2007-09-09		Duin1-2	-3	11:07:00	2	C	2	0	0	0	2			2
2007-09-09		Duin1-2	-3	11:11:00	2	C	2	0	0	0	2			2
2007-09-09		Duin1-2	-3	11:17:00	1	C	1	0	0	1	0			1
2007-09-09		Duin2	-3	11:20:00	5	C	5	0	1	1	3			5
2007-09-09		Duin2	-3	11:22:00	2	C	2	0	1	1	0			2
2007-09-09		Duin2	-3	11:32:00	1	C	1	0	1	0	0			1
2007-09-10		D10-11	-3	10:58:00	2	C	0	0	0	0	2						2
2007-09-10		D11-12	-3	11:02:00	2	C	2	0	0	1	1			2
2007-09-10		D11-12	-3	11:08:00	3	C	3	0	1	0	2			3
2007-09-10		D14-15	-3	11:22:00	1	C	1	0	1	0	0			1
2007-09-10		D14	-3	11:33:00	1	C	1	0	1	0	0		1
2007-09-10		D16	-3	11:38:00	1	C	1	0	0	0	1			1
2007-09-10		D16-17	-3	11:48:00	2	C	2	0	0	0	2			2
2007-09-10		D16-17	-3	12:03:00	1	C	1	0	1	0	0			1
2007-09-10		D17	-3	12:06:00	2	C	2	0	0	0	2			2
2007-09-10		D17-18	-3	12:06:00	4	C	4	0	1	0	3			4
2007-09-10		D17-18	-3	12:10:00	1	C	1	0	0	0	1			1
2007-09-10		D19-20	-3	12:15:00	2	C	2	0	0	0	2			2
2007-09-10		D20-21	-3	12:34:00	4	C	3	0	0	0	4			4
2007-09-10		D19-20	-3	12:45:00	3	C	3	0	0	0	3			3
2007-09-10		D21-22	-3	12:50:00	2	C	2	0	1	0	1			2
2007-09-11		D30-pad	-3	11:37:00	1	C	1	0	1	0	0			1
2007-09-11		D30-pad	-3	11:39:00	3	C	3	0	0	0	3			3
2007-09-11		D30paal	-3	11:45:00	2	C	2	0	2	0	0			2
2007-09-11		D30paal	-3	11:46:00	2	C	2	0	0	0	2
2007-09-11		D30-pad	-3	11:48:00	4	C	4	0	0	0	4		1	2	1
2007-09-11		D30-pad	-3	11:51:00	2	C	2	0	2	0	0			2
2007-09-11		D30-pad	-3	11:52:00	2	C	2	0	0	0	2		2
2007-09-11		Pad-D30	-3	11:55:00	4	C	4	0	3	0	1			4
2007-09-11		Pad-D30	-3	11:56:00	1	C	1	0	0	0	1		1
2007-09-11		Pad-D30	-3	12:11:00	2	C	2	0	0	0	2			2
2007-09-11		D30	-3	12:19:00	1	C	2	0	0	0	2			1	1
2007-09-11		D28	-3	12:27:00	1	C	1	0	0	1	0			1
2007-09-11		D27-26	-3	12:31:00	3	C	3	0	0	0	3			3
2007-09-11		D26	-3	12:34:00	2	C	2	0	0	0	2			2
2007-09-11		D26-25	-3	12:36:00	1	C	1	0	0	0	1			1
2007-09-12		D11	-3	12:53:00	1	C	1	0	0	0	1			1
2007-09-12		D11-12	-3	12:55:00	1	C	1	0	1	0	0			1
2007-09-12		D12	-3	12:58:00	1	C	1	0	0	1	0			1
2007-09-12		D12-13	-3	13:05:00	2	C	2	0	0	0	2			2
2007-09-12		D13-14	-3	13:05:00	1	C	1	0	1	0	0			1
2007-09-12		D14-15	-3	13:10:00	1	C	1	0	0	0	1				1
2007-09-12		D16-17	-3	13:16:00	4	C	4	1	1	1	2	Y3YYRY		3	1
2007-09-12		D17	-3	13:19:00	2	C	2	0	0	0	2			1	1
2007-09-12		D17	-3	13:21:00	1	C	1	0	0	0	1		1
2007-09-12		D17	-3	13:23:00	3	C	3	1	0	1	1	Y3YYRY		3
2007-09-12		D18	-3	13:30:00	1	C	1	0	0	0	1			1
2007-09-12		D19	-3	13:33:00	1	C	1	0	1	0	0			1
2007-09-12		D20	-3	13:37:00	3	C	3	0	2	0	1			3
2007-09-12		D20-21	-3	13:41:00	2	C	2	0	0	0	2			2
2007-09-12		D21-22	-3	13:45:00	2	C	2	0	0	0	2			2
2007-09-13	16:16:00	reddingsbootp-vlag	-3	13:29:00	3	C	3	0	1	0	2			2
2007-09-25		D24-25	-3	10:50:00	2	C	2	0	0	0	2			2
2007-09-25		D24-25	-3	11:03:00	1	C	1	0	0	0	1			1
2007-09-26		D13-14	-3	11:49:00	1	C	0	0	0	0	1			1
2007-09-26		D12-13	-3	12:31:00	4	C	0	0	0	0	4			4
2007-10-02		D20	-3	16:02:00	2	C	2	0	0	0	2			2
2007-10-02		D16-17	-3	16:14:00	2	C	0	0	0	0	2						2
2007-10-02		D13	-3	16:25:00	4	C	2	0	0	0	4		2	2
2007-10-08		D8	-3	10:30:00	14	C	14	0	0	0	14		11		3
2007-10-23		D4-6	-3	09:10:00	12	C	12	0	0	0	12		12
2007-10-23		D7	-3	09:15:00	2	C	2	0	0	0	2			2
2007-10-23		D7	-3	09:42:00	1	C	1	0	0	0	1			1
2007-10-23		D12	-3	09:48:00	45	E	38	0	0	0	45			45
2007-10-23		D13	-3	10:02:00	12	C	12	1	0	1	11	Y3YYWG		12			12
2007-09-27		D23	-3	12:54:00	1	C	1	0	1	0	0			1
2007-09-27		D25-26	-3	13:13:00	1	C	1	0	1	0	0			1
2007-10-24		D21	-3	10:23:00	40	E	8	0	0	0	40		8				32
2007-10-24		D20	-3	10:27:00	15	C	15	0	0	0	15			15
2007-10-24		D29	-3	11:07:00	1	C	1	0	0	0	1				1
2007-10-24		D30	-3	11:09:00	13	C	13	0	0	0	13			13
2007-10-24		D26-27	-3	11:10:00	1	C	1	0	0	0	1			1
2007-10-25		D17-18	-3	11:09:00	3	C	3	0	0	0	3			3
2007-10-25		D18-19	-3	11:14:00	29	C	29	1	0	1	28	Y3YY??	29
2007-10-25		D19	-3	11:18:00	13	C	13	0	0	0	13		12	1
2007-10-25		D21-22	-3	11:30:00	2	C	2	0	0	0	2			1
2007-10-25		D23-14	-3	11:44:00	1	C	1	0	0	0	1			1
2007-10-25		D24-25	-3	11:53:00	1	C	1	0	0	1	0			1
2007-10-25		D25-26	-3	11:58:00	2	C	2	0	2	0	2			2
2007-10-27		D14	-3	12:37:00	5	C	5	1	0	1	4	Y3YYWW		5
2007-10-27		D15	-3	12:41:00	6	C	6	0	0	0	6			6
2007-10-27		D15-16	-3	12:43:00	1	C	1	0	0	0	1			1
2007-10-27		D16-17	-3	12:46:00	1	C	1	0	0	0	1			1
2007-10-27		D17-18	-3	12:52:00	5	C	5	0	0	0	5			4
2007-10-27		D18	-3	12:56:00	2	C	2	0	0	0	2			2
2007-10-27		D19	-3	12:56:00	20	C	2	0	0	0	20			20
2007-10-27		D20	-3	13:04:00	17	C	16	0	0	0	17		2	14	1
2007-10-27		D20-21	-3	13:06:00	5	C	3	0	0	0	5			4
2007-10-27		D21-22	-3	13:12:00	4	C	4	0	0	0	4			2
2007-10-27		D22-23	-3	13:17:00	3	C	3	0	0	0	3			1
2007-10-27		D23	-3	13:21:00	1	C	1	0	0	0	1			1
2007-10-27		D23-24	-3	13:23:00	3	C	3	0	0	0	3			3
2007-10-27		D24	-3	13:23:00	1	C	1	0	0	0	1			1
2007-10-27		D24-25	-3	13:27:00	2	C	2	0	0	0	2			2
2007-10-27		D25-26	-3	13:31:00	1	C	1	0	0	0	1			1
2007-10-29		D6-8	-3	12:56:00	27	C	27	2	0	2	25	Y3YYYG, Y3YYWR	9	11	7
2007-10-29		D8-9	-3	13:11:00	3	C	3	0	0	0	3			3
2007-10-29		D9-10	-3	13:15:00	3	C	3	0	0	0	3			3
2007-10-29		D10	-3	13:22:00	1	C	1	0	0	0	1			1
2007-10-29		D10-11	-3	13:25:00	5	C	5	0	0	0	5			3
2007-10-29		D11	-3	13:34:00	2	C	2	0	0	0	2			2
2007-10-29		D11-12	-3	13:34:00	3	C	3	0	0	0	3			3
2007-10-29		D12	-3	13:34:00	3	C	3	0	0	0	3			3
2007-10-29		D12-13	-3	13:41:00	3	C	3	0	0	0	3			2	1
2007-10-29		D13	-3	13:41:00	2	C	2	0	0	0	2			2
2007-10-29		D13-14	-3	13:50:00	3	C	3	0	0	0	3			3
2007-10-29		D14	-3	13:50:00	1	C	1	0	0	0	1			1
2007-10-29		D14-15	-3	13:54:00	2	C	2	0	0	0	2			2
2007-10-29		D15-16	-3	13:54:00	7	C	7	0	0	0	7			7
2007-10-30		D9-10	-3	12:46:00	2	C	2	0	0	0	2			2
2007-10-30		D10-11	-3	12:50:00	2	C	2	0	0	0	2			2
2007-10-30		D11	-3	12:51:00	5	C	5	0	0	0	5			5
2007-10-30		D11-12	-3	12:56:00	2	C	2	0	0	0	2			2
2007-10-30		D12	-3	12:56:00	2	C	2	0	0	0	2			2
2007-10-30		D12-13	-3	13:00:00	1	C	1	0	0	0	1			1
2007-10-30		D13	-3	13:00:00	2	C	2	0	0	0	2			2
2007-10-30		D13-14	-3	13:03:00	6	C	6	0	0	0	6			6
2007-10-30		D14-15	-3	13:08:00	3	C	3	0	0	0	3			3
2007-10-30		D15	-3	13:08:00	2	C	2	0	0	0	2			2
2007-10-30		D15-16	-3	13:12:00	3	C	3	0	0	0	3			3
2007-10-30		D16-17	-3	13:17:00	1	C	1	1	0	1	0	Y3YYRY		1
2007-10-30		D17	-3	13:28:00	2	C	2	1	0	1	1	Y3YYRY		2
2007-10-30		D18	-3	13:30:00	2	C	2	0	0	0	2			2
2007-10-30		D19-20	-3	13:37:00	6	C	6	0	0	0	6			5			1
2007-08-28		D15-16	-2	13:31:00	2	C	2	0	2	0	0			2			2
2007-08-28		D19-20	-2	13:54:00	3	C	3	0	0	0	3						3
2007-09-04		Reddingsbootp-vlag	-2	18:02:00	5	C	5	0	0	0	5			5
2007-09-04		Reddingsbootp-vlag	-2	18:04:00	1	C	1	0	0	0	1			1
2007-09-04		Reddingsbootp-vlag	-2	18:05:00	1	C	1	0	0	0	1			1
2007-09-04		Reddingsbootp-vlag	-2	18:07:00	2	C	2	0	0	0	2			2
2007-09-04		Reddingsbootp-dam	-2	18:16:00	2	C	2	0	1	1	0			2
2007-09-04		D1-2	-2	18:25:00	1	C	1	0	0	0	1			1	1
2007-09-04		D1-2	-2	18:26:00	1	C	1	0	0	0	1			1
2007-09-04		D3-4	-2	18:32:00	1	C	1	0	0	0	1		1
2007-09-05		Reddingsbootpad	-2	18:44:00	1	C	1	0	1	0	0			1
2007-09-05		reddingsbootp-dam	-2	18:49:00	1	C	1	0	1	0	0			1
2007-09-05		reddingsbootp-dam	-2	18:52:00	2	C	0	0	0	0	2						2
2007-09-05		DamB-1	-2	18:55:00	1	C	1	0	1	0	0			1
2007-09-05		D15-16	-2	19:09:00	1	C	1	0	1	0	0			1
2007-09-05		D18-19	-2	19:15:00	3	C	3	0	0	0	3			3
2007-09-05		D20-21	-2	19:19:00	1	C	1	0	0	0	1			1
2007-09-07	11:06:00	DamB-1	-2	09:26:00	1	C	1	0	0	0	1			1
2007-09-07	23:35:00	D6	-2	09:50:00	1	C	1	0	0	0	1			1
2007-09-07		D8	-2	10:05:00	1	C	1	0	1	0			1
2007-09-08		Hut-westpunt	-2	10:43:00	2	C	1	0	1	0	1			2
2007-09-08		Hut-westpunt	-2	10:46:00	2	C	2	0	1	0	1			2
2007-09-08		Westpunt	-2	11:20:00	1	C	1	0	1	0	0			1
2007-09-09		Duin2	-2	11:35:00	3	C	3	0	0	0	3			3
2007-09-09		Duin2	-2	11:38:00	2	C	2	0	0	1	1			2
2007-09-09		Duin2	-2	11:40:00	3	C	3	0	1	2	0			3
2007-09-09		Duin2	-2	11:42:00	11	C	11	0	0	0	11			11
2007-09-09		Duin2-3	-2	11:49:00	2	C	2	0	1	0	1			2
2007-09-09		Duin2-3	-2	11:54:00	1	C	1	0	0	1	0			1
2007-09-09		Duin2-3	-2	12:00:00	3	C	3	0	1	0	2			3
2007-09-09		Duin2-3	-2	12:11:00	1	C	1	0	0	1	0			1
2007-09-09		Duin2-3	-2	12:16:00	3	C	2	0	0	1	2			2	1
2007-09-09		duin3-hut	-2	12:26:00	2	C	2	0	0	0	2			2
2007-09-09		duin3-hut	-2	12:28:00	3	C	3	0	0	1	2			3
2007-09-09		duin3-hut	-2	12:33:00	1	C	1	0	1	0	0			1
2007-09-11		D26-25	-2	12:38:00	2	C	2	0	1	0	1			2
2007-09-11		D25	-2	12:42:00	2	C	0	0	0	0	2						2
2007-09-11		D25-24	-2	12:43:00	1	C	1	0	0	0	1			1
2007-09-11		D24	-2	12:43:00	1	C	0	0	0	0	1				1
2007-09-11		D25-24	-2	12:49:00	1	C	1	0	0	0	1			1
2007-09-11		D24-23	-2	12:52:00	1	C	1	0	0	0	1			1
2007-09-11		D23-22	-2	12:55:00	1	C	1	0	0	0	1			1
2007-09-11		D22-21	-2	12:58:00	5	C	5	0	0	0	5			5
2007-09-11		D21-20	-2	13:04:00	5	C	5	1	0	1	4	Y3YYRY		5
2007-09-11		D20-19	-2	13:36:00	4	C	4	0	1	0	3			4
2007-09-11		D19-18	-2	13:34:00	4	C	4	1	0	1	3	Y3YYRY		4
2007-09-12		D22-23	-2	13:50:00	1	C	1	0	0	0	1			1
2007-09-12		D23	-2	13:53:00	2	C	2	0	1	0	1			2
2007-09-12		D23-24	-2	13:53:00	1	C	1	0	0	0	1			1
2007-09-12		D25	-2	14:05:00	2	C	2	0	0	0	2			2
2007-09-12		D25-26	-2	14:05:00	1	C	1	0	1	0	0			1
2007-09-12		D26-27	-2	14:10:00	1	C	1	0	0	0	1				1		1
2007-09-12		D28	-2	14:16:00	2	C	2	0	0	0	2			2
2007-09-12		D29	-2	14:19:00	1	C	1	0	0	0	1			1
2007-09-12		D29	-2	14:21:00	1	C	1	0	0	0	1
2007-09-12		D29	-2	14:25:00	2	C	2	0	0	0	2			2
2007-09-12		D27	-2	14:45:00	1	C	1	0	0	0	1		1
2007-09-24		D9	-2	11:35:00	3	C	0	0	0	0	3			3
2007-09-24		D9-10	-2	11:39:00	1	C	0	0	0	0	1			1
2007-09-24		D10-11	-2	11:46:00	3	C	0	0	0	0	3			3
2007-09-24		D10-11	-2	11:53:00	5	C	0	0	0	0	5			5
2007-09-25		D26-27	-2	11:57:00	3	C	0	0	0	0	3			3
2007-09-26		D11-12	-2	12:52:00	4	C	0	0	0	0	4			4
2007-09-26		D10-11	-2	13:16:00	2	C	2	0	0	0	2			2
2007-09-27		D27-28	-2	13:24:00	2	C	2	0	0	0	2			1	1
2007-09-27		D28	-2	13:30:00	2	C	2	0	0	0	2		1		1
2007-09-27		D29-30	-2	13:35:00	3	C	3	0	0	0	3			2			1
2007-09-27		D30-pad	-2	13:41:00	1	C	1	0	1	0	0		1
2007-09-27		D27	-2	14:06:00	1	C	1	0	1	0	0			1
2007-09-27		D25	-2	14:13:00	1	C	1	0	0	0	1		1
2007-09-27		D24	-2	14:19:00	1	C	1	0	1	0	0			1
2007-10-22		D7	-2	09:51:00	28	C	28	1	0	1	27	Y3YYWW		28
2007-10-23		D14	-2	10:15:00	12	C	12	1	0	1	11	Y3YYWG		12
2007-10-23		D17	-2	10:28:00	2	C	2	0	0	0	2			2
2007-10-23		D18	-2	10:32:00	25	C	25	0	0	0	25			22	3
2007-10-23		D19	-2	10:44:00	21	C	21	2	0	2	19	Y3YYRW, Y3YYWR		21
2007-10-23		D20	-2	10:56:00	25	E	0	0	0	0	25			25
2007-10-24		D18	-2	11:56:00	50	E	21	1	0	1	49	Y3YYWR		50
2007-10-25		D26-27	-2	12:01:00	2	C	2	0	0	0	2			2
2007-10-25		D27-28	-2	12:05:00	3	C	3	0	0	0	3			3
2007-10-25		D28-29	-2	12:11:00	1	C	1	0	0	0	1			1
2007-10-27		D26-27	-2	13:36:00	2	C	2	0	0	0	2			2
2007-10-27		D27-28	-2	13:41:00	3	C	3	0	0	0	3			3
2007-10-27		D28-29	-2	13:48:00	1	C	1	0	0	0	1			1
2007-10-27		D29	-2	13:48:00	1	C	1	0	0	0	1				1
2007-10-27		D29-30	-2	13:49:00	1	C	1	0	0	0	1			1
2007-10-27		D29-30	-2	13:52:00	1	C	1	0	0	0	1			1
2007-10-27		D28-29	-2	13:56:00	3	C	3	0	0	0	3			3
2007-10-27		D26-27	-2	14:01:00	2	C	2	0	0	0	2			2
2007-10-27		D25-26	-2	14:05:00	3	C	3	0	0	0	3			3
2007-10-27		D24-25	-2	14:09:00	1	C	1	0	0	0	1			1
2007-10-27		D23-24	-2	14:14:00	1	C	1	0	0	0	1			1
2007-10-27		D22-23	-2	14:18:00	1	C	1	0	0	0	1			1
2007-10-27		D20-21	-2	14:27:00	1	C	1	0	0	0	1				1
2007-10-27		D20	-2	14:30:00	7	C	7	0	0	0	7			7
2007-10-27		D19	-2	14:35:00	12	C	12	0	0	0	12			10	2
2007-10-29		D16	-2	14:05:00	2	C	2	0	0	0	2			2
2007-10-29		D16-17	-2	14:08:00	5	C	5	1	0	1	4	Y3YYRY		5
2007-10-29		D17-18	-2	14:15:00	6	C	6	0	0	0	6		3	3
2007-10-29		D18-19	-2	14:19:00	3	C	3	0	0	0	3			3
2007-10-29		D19-20	-2	14:32:00	4	C	4	0	0	0	4			4
2007-10-29		D20	-2	14:37:00	1	C	1	0	0	0	1			1
2007-10-29		D20-21	-2	14:37:00	4	C	4	0	0	0	4			2
2007-10-29		D21-22	-2	14:44:00	4	C	1	0	0	0	4						4
2007-10-29		D21-22	-2	14:44:00	3	C	3	0	0	0	3			3
2007-10-29		D22	-2	14:44:00	1	C	1	0	0	0	1		1
2007-10-29		D22-23	-2	14:48:00	2	C	1	0	0	0	1			1
2007-10-29		D23-24	-2	14:52:00	2	C	2	0	0	0	2			2
2007-10-30		D20	-2	13:42:00	4	C	4	0	0	0	4			4
2007-10-30		D20-21	-2	13:43:00	7	C	7	0	0	0	7			7
2007-10-30		D21	-2	13:48:00	2	C	2	0	0	0	2			2
2007-10-30		D21-22	-2	13:49:00	11	C	11	0	0	0	11			8
2007-10-30		D22	-2	13:54:00	6	C	6	0	0	0	6		1	3	2
2007-10-30		D22-23	-2	13:55:00	7	C	7	0	0	0	7			7
2007-10-30		D26-27	-2	14:18:00	1	C	1	0	0	0	1			1
2007-10-30		D28-29	-2	14:24:00	4	C	4	0	0	0	4			4
2007-10-30		D29	-2	14:24:00	1	C	1	0	0	0	1			1
2007-10-30		D29-30	-2	14:29:00	5	C	5	0	0	0	5			5
2007-10-30		D29-30	-2	14:31:00	4	C	4	0	0	0	4			4
2007-10-30		D29	-2	14:31:00	1	C	1	0	0	0	1			1
2007-10-30		D28-29	-2	14:33:00	1	C	1	0	0	0	1			1
2007-10-30		D27-28	-2	14:37:00	1	C	1	0	0	0	1			1
2007-10-30		D27	-2	14:41:00	1	C	1	0	0	0	1			1
2007-10-30		D26-27	-2	14:41:00	2	C	2	0	0	0	2			2
2007-08-28		D26	-1	14:56:00	4		4	0	4	0	0
2007-08-28		D26-27	-1	14:56:00	6		1	0	0	1	5						1
2007-08-29		Reddinsbootp-dam	-1	14:29:00	1	C	1	0	0	1	0			1
2007-08-29		Reddinsbootp-dam	-1	14:41:00	2	C	2	0	1	1	0		1	1	1
2007-09-03		D6-7	-1	18:35:00	4	C	4	0	2	1	1			4
2007-09-03		D5-6	-1	18:49:00	1	C	1	0	0	0	1			1
2007-09-03		D5-6	-1	18:51:00	1	C	1	0	1	0				1
2007-09-03		D4-5	-1	18:56:00	1	C	1	0	1	0	0			1
2007-09-03		D3-4	-1	19:04:00	3	C	3	0	0	1	2			2
2007-09-07		D8-9	-1	10:12:00	1	C	0	0	0	0	1						1
2007-09-07		D9	-1	10:21:00	1	C	1	0	1	0				1
2007-09-07		D10	-1	10:28:00	1	C	1	0	1	0	0			1
2007-09-07		D12	-1	10:33:00	1	C	1	0	1	0	0			1
2007-09-07		D13	-1	10:44:00	1	C	1	0	1	0				1
2007-09-07		D16	-1	10:56:00	1	C	1	0	0	0	1			1
2007-09-09		Hut	-1	12:41:00	5	C	5	0	2	1	2			5
2007-09-09		Hut-westpunt	-1	12:53:00	1	C	1	0	1	0	0			1
2007-09-09		westpunt	-1	13:30:00	1	C	1	0	0	1	0			1
2007-09-10		D22-23	-1	13:04:00	2	C	2	0	1	0	1			2
2007-09-10		D23-24	-1	13:11:00	2	C	2	0	0	0	2			2
2007-09-10		D24	-1	13:13:00	1	C	1	0	0	1	0			1
2007-09-10		D24-25	-1	13:19:00	2	C	2	0	1	1	0			2
2007-09-10		D26-27	-1	13:27:00	2	C	2	0	0	0	2			2
2007-09-10		D26-27	-1	13:27:00	2	C	0	0	0	0	2						2
2007-09-10		D27-28	-1	13:33:00	2	C	2	0	0	0	2			2
2007-09-10		D29-30	-1	13:56:00	1	C	1	0	0	0	1			1
2007-09-10		D30-29	-1	14:20:00	2	C	2	0	0	0	2			2
2007-09-11		D18-17	-1	13:42:00	3	C	3	1	0	1	2	Y3YYRY		3
2007-09-11		D17	-1	13:44:00	2	C	2	1	0	1	1	Y3YYRY
2007-09-11		D17-16	-1	13:50:00	4	C	4	1	0	1	3	Y3YYRY		4
2007-09-11		D16-15	-1	13:54:00	1	C	1	0	0	1	0			1
2007-09-11		D15-14	-1	13:57:00	4	C	4	0	0	1	3			4
2007-09-11		D14-13	-1	14:02:00	1	C	1	0	1	0	0			1
2007-09-11		D12-11	-1	14:09:00	2	C	2	0	0	0	0			2
2007-09-11		D11-10	-1	14:12:00	2	C	2	0	0	0	2			2
2007-09-11		D8	-1	14:28:00	2	C	2	0	1	0	2
2007-09-11		D7	-1	14:34:00	5	C	5	0	0	0	5			5
2007-09-11		D6-7	-1	14:36:00	2	C	2	0	0	0	2			2
2007-09-24		D11-12	-1	12:02:00	1	C	0	0	0	0	1			1
2007-09-24		D11-12	-1	12:08:00	1	C	1	0	0	0	1			1
2007-09-24		D12-13	-1	12:22:00	1	C	0	0	0	0	1						1
2007-09-25		D27-28	-1	12:53:00	1	C	0	0	0	0	1			1
2007-09-25		D28-29	-1	13:32:00	3	C	0	0	0	0	3			2
2007-09-26		D8-9	-1	13:54:00	1	C	1	0	0	0	1			1
2007-09-26		D6-8	-1	14:08:00	2	C	0	0	0	0	2			2
2007-09-27		D22	-1	14:27:00	1	C	1	0	1	0	0			1
2007-09-27		D21	-1	14:40:00	2	C	1	0	1	0	1		1	1
2007-09-27		D20	-1	14:45:00	3	C	3	0	0	0	3		2		1
2007-09-27		D19	-1	14:51:00	3	C	3	0	0	0	3			3
2007-09-27		D18	-1	14:55:00	3	C	3	0	0	0	3			3
2007-09-27		D17	-1	14:59:00	1	C	1	0	1	0	0			1
2007-09-27		D16	-1	15:06:00	4	C	2	0	0	0	2			4
2007-10-22		D8	-1	10:00:00	8	C	6	0	0	0	8			8
2007-10-22		D9	-1	10:12:00	1	C	0	0	0	0	1			1
2007-10-22		D10	-1	10:18:00	16	C	16	1	0	1	15						16
2007-10-22		D12	-1	10:29:00	25	E	10	0	0	0	25			24	1
2007-10-22		D13	-1	10:53:00	4	C	4	1	0	1	3	Y3YYWG		4
2007-10-23		D29	-1	11:28:00	6	C	6	0	0	0	6			6
2007-10-23		D29	-1	11:47:00	1	C	0	0	0	0	1			1
2007-10-24		D14	-1	12:20:00	21	C	7	0	0	0	21			21
2007-10-24		D12	-1	12:31:00	30	E	10	1	0	1	29	Y3YY??	12	16	2
2007-10-24		D10	-1	12:39:00	22	C	15	0	0	0	22			22
2007-10-24		D8	-1	12:49:00	32	C	0	0	0	0	32		14	18
2007-10-24		D7	-1	12:54:00	20	E	8	0	0	0	20			20
2007-10-24		D6	-1	13:01:00	44	C	16	0	0	0	44		5	39
2007-10-25		D15	-1	13:24:00	27	C	27	1	0	1	26	Y3YY??		27			27
2007-10-25		D13	-1	13:30:00	5	C	5	0	0	0	5			5
2007-10-25		D12	-1	13:35:00	16	C	0	0	0	0	16			10	6
2007-10-25		D8	-1	13:56:00	26	C	26	1	0	1	25	Y3YYYR		23	3
2007-10-27		D18	-1	14:41:00	22	C	22	0	0	0	22			20	2
2007-10-27		D17	-1	14:49:00	2	C	2	0	0	0	2			1
2007-10-27		D16	-1	14:53:00	10	E	0	0	0	0	10			10
2007-10-27		D12	-1	15:11:00	12	C	9	0	0	0	12			12
2007-10-27		D11	-1	15:16:00	1	C	1	0	0	0	1			1
2007-10-27		D10	-1	15:21:00	4	C	2	0	0	0	4			4
2007-10-27		D8	-1	15:41:00	10	C	10	2	0	2	8	Y3YYWG, Y3YYYR		10
2007-10-29		D25-26	-1	15:15:00	1	C	1	0	0	0	1			1
2007-10-29		D27-28	-1	15:22:00	2	C	2	0	0	0	2			2
2007-10-29		D28	-1	15:22:00	1	C	1	0	0	0	1		1
2007-10-29		D28-29	-1	15:29:00	1	C	1	0	0	0	1			1
2007-10-29		D29	-1	15:31:00	3	C	2	0	0	0	3			2	1
2007-10-29		D29-30	-1	15:33:00	3	C	3	0	0	0	3			3
2007-10-29		D27-28	-1	15:39:00	1	C	1	0	0	0	1			1
2007-10-29		D25-26	-1	15:46:00	1	C	1	0	0	0	1			1
2007-10-29		D25	-1	15:46:00	1	C	0	0	0	0	1				1
2007-10-30		D25-26	-1	14:46:00	2	C	2	0	0	0	2			2
2007-10-30		D25	-1	14:50:00	1	C	1	0	0	0	1		1
2007-10-30		D24-25	-1	14:51:00	3	C	3	0	0	0	3			3
2007-10-30		D23-24	-1	14:57:00	5	C	5	0	0	0	5			2
2007-10-30		D21-22	-1	15:07:00	3	C	3	0	0	0	3			3
2007-10-30		D20-21	-1	15:12:00	3	C	3	0	0	0	3			3
2007-10-30		D19-20	-1	15:19:00	3	C	3	0	0	0	3			3
2007-10-30		D18-19	-1	15:25:00	5	C	5	0	0	0	5			5
2007-10-30		D16-17	-1	15:30:00	5	C	5	1	0	1	4	Y3YYRY		3	2
2007-10-30		D15-16	-1	15:35:00	3	C	3	0	0	0	3			3
2007-10-30		D14-15	-1	15:39:00	1	C	1	0	0	0	1			1

## Sheet: Sheet7
Date	Location	Exact location	Tide	Time	No. birds	Count/Estimate	# checked for CR	# colourringed	#juv	#adult	#unknown age	Colourring codes	#bathing	#rest	#foraging	#preening	# running	#flying
2008-01-17	2km west of Amansuri		-6	11:57:00	350	E	0	0	0	0	350		0	0	0	0	0	350
2008-01-17	2km west of Amansuri		-6	12:00:00	100	E	0	0	0	0	100		0	0	0	0	0	100
2008-01-18	2 km west Amansuri		-6	12:59:00	1118	C	?	11	0	0	1118	R3YGYY, R3RWYY, R3RRGG, R3RRYR, R3YRRR, R3WGGG, R3YYRW, R3YWGW, R3YWYG, R3WWGW, R3WWGR	0	0	0	0	0	118
2008-01-21	Amansuri inlet west		-6	15:39:00	200	E	?	?	0	0	200		0	200	0	0	0	0
2008-01-22	100m west of Amansuri		-6	15:35:00	28	C	28	5	0	0	28	R3RGWG, R3RGWW, R3WGWG, R3YWRG, R3WGGW	0	0	28	0	0	0
2008-01-22	100m west of Amansuri		-6	16:05:00	800	E	?	?	0	0	800		0	400	400	0	0	0
2008-01-29	Esiama		-6	08:30:00	10	C	10	0	0	0	10		0	0	10	0	0	0
2008-01-29	Esiama		-6	08:41:00	4	C	4	0	0	0	4		0	0	4	0	0	0
2008-02-13	Esiama		-6	08:40:00	2	C	2	0	0	0	2		0	0	2	0	0	0
2008-02-15	200m west Esiama		-6	11:35:00	6	C	6	1	0	0	6	R3RGWR	0	0	6	0	0	0
2008-02-15	Esiama		-6	11:45:00	29	C	?	6	0	0	29	R3RGWR, R3WYRG, R3YGWW, R3RGRW, R3YGRG, R3RGGG	0	0	29	0	0	0
2008-02-19	HVP-Bobrama		-6	14:45:00	70	C	0	0	0	0	70		0	0	70	0	0	0
2008-02-19	HVP-Bobrama		-6	15:02:00	75	C	0	0	0	0	75		0	0	75	0	0	0
2008-02-19	HVP-Bobrama		-6	15:19:00	104	C	?	?	0	0	104		0	0	104	0	0	0
2008-02-19	HVP-Bobrama		-6	15:19:00	12	C	?	?	0	0	12		0	0	0	0	0	12
2008-01-17	>2 km west of Amansuri	Newly planted palmtrees	-5	12:54:00	1	C	1	1	0	0	1	R3RWYW	0	0	1	0	0	0
2008-01-17	HVP-Bobrama		-5	12:31:00	21	C	21	2	0	0	21	R3YYRG, R3YGRR	0	0	21	0	0	0
2008-01-18	HVP stream outlet		-5	14:30:00	105	C	?	0	0	0	105		0	71	0	34	0	0
2008-01-18	HVP stream outlet		-5	14:40:00	352	C	?	0	0	0	352		0	264	0	88	0	0
2008-01-18	1 km west of Amansuri		-5	14:17:00	220	E	220	3	0	0	220	R3YRWY, R3RYYY	0	210	0	10	0	0
2008-02-25	1st -2nd stream		-5	08:13:00	37	C	37	6	0	0	37	R3WWYR, R3RRGG, R3RWYW	0	0	37	0	0	0
2008-02-25	1st -2nd stream		-5	08:18:00	95	C	37	6	0	0	95	R3WWYR, R3RRGG, R3RWYW	0	0	92	3	0	0
2008-02-25	1st -2nd stream		-5	08:18:00	37	C	?	?	0	0	37		0	0	0	0	0	37
2008-02-25	1st -2nd stream		-5	08:31:00	24	C	?	?	0	0	24		0	0	0	0	0	24
2008-02-25	1st -2nd stream		-5	08:36:00	86	C	57	2	0	0	86	R3YWYY, R3YRWW	1	2	83	1	0	0
2008-02-25	1st -2nd stream		-5	08:39:00	40	C	?	?	0	0	40		0	0	0	0	0	40
2008-02-25	1st -2nd stream		-5	08:39:00	46	C	?	?	0	0	46		0	0	0	0	0	0
2008-02-26	Esiama		-5	08:25:00	49	C	49	0	0	0	49		0	11	33	5	0	0
2008-02-26	Esiama		-5	08:34:00	200	E	?	2	0	0	200	R3WYRW, R3GGYG	1	50	139	10	0	0
2008-02-26	East side esiama village		-5	08:53:00	73	C	73	1	0	0	73	R3YWRW	0	0	73	0	0	0
2008-02-26	Esiama		-5	09:06:00	44	C	?	?	0	0	44		0	0	49	5	0	0
2008-01-29	350m east Amansuri		-5	09:36:00	21	C	21	1	0	0	21	R3RGWR	0	0	21	0	0	0
2008-01-29	350m east Amansuri		-5	09:44:00	7	C	7	2	0	0	7	R3RGWW, R3RYRW	0	0	7	0	0	0
2008-01-29	350m east Amansuri		-5	09:54:00	11	C	?	?	0	0	11		0	1	10	0	0	0
2008-01-26	1st -2nd stream		-5	08:19:00	4	C	4	1	0	0	4		0	0	4	0	0	0
2008-01-28	Esiama		-5	09:01:00	26	C	26	3	0	0	26	R3RRWW, R3RWYY, R3RGWW	0	0	26	0	0	0
2008-01-28	Esiama		-5	09:28:00	28	C	26	3	0	0	28	R3RRWW, R3RWYY, R3RGWW	0	9	19	0	0	0
2008-01-28	Esiama		-5	09:35:00	50	E	0	0	0	0	50		0	0	0	0	0	50
2008-01-28	Esiama-Amansuri		-5	09:48:00	1	C	1	0	0	0	1		0	1	0	0	0	0
2008-02-15	Esiama		-5	12:45:00	6	C	6	0	0	0	6		0	0	6	0	0	0
2008-02-15	Esiama		-5	12:55:00	25	C	?	?	0	0	25		0	10	15	0	0	0
2008-02-15	Esiama		-5	12:57:00	25	C	?	?	0	0	25		2	10	6	7	0	0
2008-01-11	Asanta-Bobrama		-4	08:26:00	30	E	0	0	0	0	30		0	0	0	0	0	30
2008-01-11	Bobrama		-4	08:35:00	14	C	14	1	0	0	14	R3YWWG	0	0	14	0	0	0
2008-01-16	Asanta		-4	12:50:00	10	C	10	2	0	0	10	R3YRRY, R3YYGR	0	0	10	0	0	0
2008-01-17	>2 km west of Amansuri	Opposite remains stone hut	-4	13:35:00	2	C	2	2	0	0	2	R3RGGG, R3RWYW	0	2	0	0	0	0
2008-01-17	1.5 km west Amansuri		-4	13:50:00	2	C	2	1	0	0	2	R3RYYY	0	2	0	0	0	0
2008-01-17	1 km west of Amansuri		-4	13:59:00	2	C	2	2	0	0	2	R3RYGY, R3RGWW	0	0	2	0	0	0
2008-01-17	1 km west of Amansuri		-4	14:05:00	1000	E	?	4	0	0	1000	R3YRRW, R3RGYW, R3WYRW, R3RYWG	0	900	100	0	0	0
2008-01-18	Amansuri inlet west		-4	14:50:00	60	E	?	1	0	0	60	R3RGYW	0	55	0	0	5	0
2008-01-18	Amansuri inlet west		-4	15:00:00	670	E	?	1	0	0	670	R3RYWR	0	600	35	35	0	0
2008-01-26	kikam	60m v palmen	-4	08:46:00	31	C	31	2	0	0	31	R3YYWY	0	0	31	0	0	0
2008-01-26	Kikam-Asenko		-4	09:08:00	15	C	15	3	0	0	15	R3WWRR, R3YWYY	0	0	15	0	0	0
2008-01-26	Kikam-Asenko		-4	09:17:00	23	C	23	1	0	0	23	R3WRGG	0	2	14	7	0	0
2008-01-26	Kikam-Asenko		-4	09:22:00	12	C	12	0	0	0	12		0	4	4	4	0	0
2008-01-26	Asenko		-4	09:25:00	5	C	5	0	0	0	5		0	0	5	0	0	0
2008-01-26	Asenko		-4	09:30:00	34	C	34	2	0	0	34	R3RGGW, R3WWGW	0	4	29	1	0	0
2008-01-28	Amansuri inlet east		-4	10:26:00	41	C	?	?	0	0	41		0	40	1	0	0	0
2008-01-29	900m west Amansuri	Opposite remains stone hut	-4	11:16:00	382	C	?	7	0	0	382	R3YGYY, R3RWYY, R3RYYY, R3RGGG, R3RYGY, R3RGWG, R3RGGY	0	358	20	4	0	0
2008-01-29	900m west Amansuri	Opposite remains stone hut	-4	11:46:00	382	C	?	7	0	0	382	R3YGYY, R3RWYY, R3RYYY, R3RGGG, R3RYGY, R3RGWG, R3RGGY	0	348	24	11	0	0
2008-01-29	900m west Amansuri	Opposite remains stone hut	-4	11:48:00	382	C	?	7	0	0	382	R3YGYY, R3RWYY, R3RYYY, R3RGGG, R3RYGY, R3RGWG, R3RGGY	0	0	0	0	0	382
2008-02-13	100m west Asenko		-4	11:10:00	180	C	?	6	0	0	180	R3GYYW, R3RWYW, R3GGRY, R3WWYW, R3RRGG, R3GGGY	0	0	180	0	0	0
2008-02-15	Esiama		-4	13:07:00	27	C	?	?	0	0	27		0	0	27	0	0	0
2008-02-15	Esiama		-4	13:30:00	14		?	?	0	0	14		0	2	12	0	0	0
2008-02-15	Esiama		-4	13:36:00	60		?	?	0	0	60		0	6	54	0	0	0
2008-02-15	Esiama		-4	13:40:00	60		?	?	0	0	60		0	0	60	0	0	0
2008-02-25	2nd stream		-4	09:04:00	50	E	?	?	0	0	50		0	0	50	0	0	0
2008-02-25	Kikam-Asenko		-4	09:18:00	19	C	19	1	0	0	19	R3GGWY	0	0	19	0	0	0
2008-02-26	East side esiama village		-4	09:15:00	33	C	33	1	0	0	33	R3RRRW	0	4	28	1	0	0
2008-02-26	Esiama		-4	09:25:00	21	C	?	?	0	0	21		0	0	21	0	0	0
2008-01-11	Bobrama-Kikam		-3	09:22:00	13	C	13	0	0	0	13		0	0	13	0	0	0
2008-01-11	Bobrama-Kikam		-3	09:22:00	12	C	0	0	0	0	12		0	0	12	0	0	0
2008-01-11	Bobrama-Kikam		-3	09:29:00	1	C	1	1	0	0	1	YYGY	0	0	1	0	0	0
2008-01-16	Asanta-Bobrama	High up on beach	-3	13:26:00	8	C	8	1	0	0	8	R3YYGR	0	0	8	0	0	0
2008-01-17	Amansuri inlet east		-3	14:40:00	73	C	?	6	0	0	73	R3RGWY, R3RRGR, R3WWWR, R3WWGR, R3WGWG, R3RYYY	0	63	5	5	0	0
2008-01-17	Amansuri inlet east		-3	14:56:00	73	C	?	6	0	0	73	R3RGWY, R3RRGR, R3WWWR, R3WWGR, R3WGWG, R3RYYY	0	0	0	0	0	73
2008-01-17	Amansuri inlet east		-3	15:10:00	1	C	1	1	0	0	1	R3RRRW	0	0	1	0	0	0
2008-01-17	HVP Amansuri east		-3	15:13:00	25	E	?	1	0	0	25	R3WWWR	0	0	25	0	0	0
2008-01-22	Esiama		-3	08:00:00	180	C	?	4	0	0	180	R3YRGG, R3WWYR, R3RRRW, R3RGYG	0	0	180	0	0	0
2008-01-24	West of Kikam		-3	08:36:00	15	C	15	0	0	0	15		0	0	15	0	0	0
2008-01-24	Kikam		-3	09:28:00	56	C	?	?	0	0	56		0	0	56	0	0	0
2008-01-24	200m west Amansuri		-3	10:07:00	53	C	53	1	0	0	53		0	3	50	0	0	0
2008-01-25	300 west Amansuri		-3	09:30:00	115	C	?	?	0	0	115		0	20	89	6	0	0
2008-01-25	300 west Amansuri		-3	09:45:00	212	C	?	?	0	0	212		0	38	175	8	0	0
2008-01-25	300 west Amansuri		-3	10:00:00	145	C	?	?	0		145		0	10	135	0	0	0
2008-01-25	300-500m west Amansuri		-3	09:30:00	109	C	?	4	0	0	109	R3RYGY, R3RWYY, R3YWRG, R3YRGY	0	35	64	10	0	0
2008-01-26	Asenko-Bobrama		-3	09:49:00	32	C	26	5	0	0	32		0	0	32	0	0	0
2008-01-26	HVP stream outlet		-3	09:56:00	6	C	6	2	0	0	6	R3YWYG, R3YRWW	0	0	6	0	0	0
2008-01-26	HVP stream outlet		-3	09:59:00	26	C	?	2	0	0	26	R3RGYG, R3WWRW	0	15	11	0	0	0
2008-01-26	HVP stream outlet		-3	10:04:00	31	C	?	2	0	0	31	R3RGYG, R3WWRW	0	16	3	13	0	0
2008-01-26	200m west of Bobrama		-3	10:27:00	5	C	5	1	0	0	5	R3YYGW	0	0	5	0	0	0
2008-01-26	200m west of Bobrama		-3	10:30:00	70	C	66	5	0	0	70	R3RRRW, R3WRGG, R3YWRG, R3YWGG, R3YWRY	0	70	0	0	0	0
2008-01-26	200m west of Bobrama		-3	10:42:00	70	C	66	5	0	0	70	R3RRRW, R3WRGG, R3YWRG, R3YWGG, R3YWRY	0	41	9	2	0	0
2008-01-26	200m west of Bobrama		-3	10:43:00	81	C	66	5	0	0	81	R3RRRW, R3WRGG, R3YWRG, R3YWGG, R3YWRY	0	0	0	0	0	81
2008-01-26	200m west of Bobrama		-3	10:43:00	81	C	66	5	0	0	81	R3RRRW, R3WRGG, R3YWRG, R3YWGG, R3YWRY	0	25	20	17	0	0
2008-01-26	200m west of Bobrama		-3	10:43:00	81	C	66	5	0	0	81	R3RRRW, R3WRGG, R3YWRG, R3YWGG, R3YWRY	0	32	7	28	0	0
2008-01-28	900m west Amansuri	Opposite remains stone hut	-3	11:24:00	571	C	?	?	0	0	571		0	506	40	25	0	0
2008-01-28	900m west Amansuri	Opposite remains stone hut	-3	11:45:00	586	C	?	?	0	0	586		0	480	86	20	0	0
2008-01-29	2.5 km west amansuri		-3	12:40:00	1119	C	?	10	0	0	1119	In booklet edward	32	850	122	105	0	0
2008-01-29	2.5 km west amansuri		-3	13:10:00	1119	C	?	10	0	0	1119	In booklet edward	12	852	200	55	0	0
2008-02-13	150m east Asenko		-3	11:54:00	120	C	?	6	0	0	120	R3RWWY, R3GGWR, R3YRRW, R3YWYG, R3YWRY, R3RWGG	0	0	120	0	0	0
2008-02-25	Kikam-Asenko		-3	09:48:00	100	E	59	2	0	0	100	R3GGYG	0	10	80	10	0	0
2008-02-25	Asenko-HVP		-3	09:58:00	107	C	?	5	0	0	107	R3GYYR, R3RYRW, R3GGRW, R3RWGG, R3RWYG	0	28	65	14	0	0
2008-02-25	Asenko-HVP		-3	10:07:00	123	C	?	5	0	0	123	R3GYYR, R3RYRW, R3GGRW, R3RWGG, R3RWYG	0	31	89	3	0	0
2008-02-25	Asenko-HVP		-3	10:25:00	103	C	?	5	0	0	103	R3GYYR, R3RYRW, R3GGRW, R3RWGG, R3RWYG	0	6	97	0	0	0
2008-01-23	Amansuri inlet east		-3	08:45:00	28	C	28	2	0	0	28	R3RGWW, R3YGYY	0	0	28	0	0	0
2008-03-06	Asanta		-3	07:34:00	1	C	1	1	0	0	1	R3YGWR	0	0	1	0	0	0
2008-01-12	Esiama-Amansuri	30N 0570258, 0545650	-2	11:20:00	9	C	9	0	0	0	9		0	0	7	2	0	0
2008-01-12	Esiama-Amansuri		-2	11:36:00	9	C	9	0	0	0	9		0	0	0	0	0	9
2008-01-13	Esiama-Amansuri		-2	11:00-11:18	35	C	0	0	0	0	35		0	0	35	0	0	0
2008-01-13	halfway Amansuri-esiama		-2	11:12:00	13	C	13	0	0	0	13		0	0	13	0	0	0
2008-01-13	Amansuri inlet east		-2	11:18:00	297	C	156	8	0	0	297	?, R3YWRY, R3RGYR, R3RGGY, R3RRGR, ?, ? R3YRGG	1	172	119	5	0	0
2008-01-13	Amansuri inlet east		-2	11:19:00	72	C	?	?	0	0	72		0	33	35	4	0	0
2008-01-13	amansuri inlet east		-2	11:26:00	294	C	218	7	0	0	294		0	139	0	27	0	0
2008-01-13	Amansuri inlet east		-2	11:30:00	54	C	?	?	0	0	54		0	35	14	5	0	0
2008-01-13	Amansuri inlet east		-2	11:40:00	263	C	?	?	0	0	263		9	95	143	16	0	0
2008-01-16	HVP stream outlet		-2	14:05:00	41	C	41	6	0	0	41	R3RGGW, R3RYRR, R3YRRG, R3RRGW, R3YRRY, R3YRRW	0	5	30	6	0	0
2008-01-16	HVP stream outlet		-2	14:31:00	98	C	?	6	0	0	98	R3RGGW, R3RYRR, R3YRRG, R3RRGW, R3YRRY, R3YRRW	0	50	14	34	0	0
2008-01-17	Amansuri inlet east		-2	15:22:00	42	C	?	0	0	0	42		2	4	31	5	0	0
2008-01-17	Bobrama		-2	15:26:00	15	C	15	1	0	0	15	R3YYWW	0	0	15	0	0	0
2008-01-17	Bobrama-Asenko		-2	15:53:00	55	C	55	2	0	0	55	R3YRRY	0	0	55	0	0	0
2008-01-22	Amansuri inlet east		-2	08:40:00	258	C	?	9	0	0	258	R3RRRW, R3RGYR, R3RGYG, R3YGYY, R3RWYY, R3RGWR, R3RGWW, R3WWYR, R3RYGY	0	4	242	10	0	0
2008-01-24	Kikam		-2	09:40:00	41	C	41	2	0	0	41	?,?	0	1	28	12	0	0
2008-01-24	Kikam		-2	09:45:00	11	C	11	2	0	0	11	R3YRWG, YYGY	0	0	11	0	0	0
2008-01-24	200 m east of Kikam		-2	10:08:00	21	C	14	0	0	0	21		0	0	21	0	0	0
2008-01-24	200 m east of Kikam		-2	10:17:00	41	C	?	1	0	0	41	R3WWRW	0	0	41	0	0	0
2008-01-24	2-2.5 km west Amansuri		-2	11:07:00	1100	E	?	?	0	0	1100	In booklet edward	0	22	1078	0	0	0
2008-01-25	300 west Amansuri		-2	10:39:00	168	C	168	3	0	0	168	R3YGYY, R3RGWW, R3RGWR	0	0	168	0	0	0
2008-01-25	300 west Amansuri		-2	10:55:00	227	C	?	?	0	0	227		1	28	198	0	0	0
2008-01-25	300-500m west Amansuri		-2	10:13:00	45	C	?	5	0	0	45	R3WRYY, R3RGWW, R3YGYY, R3RGWR, R3WRYY	0	0	45	0	0	0
2008-01-26	250m west of Bobrama		-2	11:09:00	81	C	66	5	0	0	81	R3RRRW, R3WRGG, R3YWRG, R3YWGG, R3YWRY	0	48	15	6	0	0
2008-01-26	100m east of Bobrama		-2	11:21:00	15	C	15	3	0	0	15	R3WWGY	0	0	14	1	0	0
2008-01-26	Asanta		-2	11:36:00	1	C	1	1	0	0	1	R3YYGR	0	0	1	0	0	0
2008-01-26	Asanta		-2	11:43:00	71	C	71	5	0	0	71	R3YRRY, R3YGWR, R3WGWG	0	2	68	1	0	0
2008-01-28	2 km west Amansuri		-2	12:22:00	566	C	?	7	0	0	566	R3RYRY, R3WYRW, R3YWRG, R3WWWY, R3YRYY, R3YGRW, R3YGYW	18	240	256	62	0	0
2008-01-29	2.5 km west amansuri		-2	13:40:00	1119	C	?	10	0	0	1119	In booklet edward	90	805	60	84	0	0
2008-01-29	2.5 km west amansuri		-2	14:00:00	1119	C	?	10	0	0	1119	In booklet edward	108	807	30	238	0	0
2008-01-29	2.5 km west amansuri		-2	14:05:00	1119	C	?	10	0	0	1119	In booklet edward	0	0	0	0	0	1119
2008-02-18	1st stream east of esiama		-2	07:35:00	1	C	1	0	0	0	1		0	0	1	0	0	0
2008-02-22	Asanta		-2	09:21:00	32	C	?	4	0	0	32	R3YRRY, R3YYRG, R3RWGY, R3YWGG	0	2	30	0	0	0
2008-02-22	Asanta		-2	09:33:00	83	C	?	?	0	0	83		0	0	83	0	0	0
2008-02-22	Asanta	Go far sign	-2	09:48:00	63	C	53	8	0	0	63	R3YRRW, R3YRWR, R3RWYR, R3YWWR, R3RWWG, R3YYGR, R3YYWW	0	36	27	0	0	0
2008-02-22	500m west Asanta		-2	10:04:00	57	C	?	6	0	0	57	R3GGWG, R3RWGG, R3YWWR, R3WGWG, R3YYGW, R3RWWG	0	30	12	15	0	0
2008-02-20	Esiama		-2	08:53:00	11	C	5	1	0	0	11	R3WWYY	0	1	10	0	0	0
2008-02-20	Esiama		-2	08:59:00	7	C	7	0	0	0	7		0	0	7	0	0	0
2008-02-25	Asenko-HVP		-2	10:45:00	123	C	?	5	0	0	103	R3GYYR, R3RYRW, R3GGRW, R3RWGG, R3RWYG	1	25	96	10	0	0
2008-02-25	HVP stream outlet		-2	11:02:00	112	C	?	7	0	0	112	R3YRGY, R3GGYR, R3RGGY, R3RWRR, R3WGWG, R3YYWW, R3WGGR	0	83	19	10	0	0
2008-02-25	HVP stream outlet		-2	11:28:00	123	C	?	7	0	0	123	R3YRGY, R3GGYR, R3RGGY, R3RWRR, R3WGWG, R3YYWW, R3WGGR	0	108	11	4	0	0
2008-03-06	Asanta-Ankobra		-2	07:41:00	51	C	?	?	0	0	51		0	0	51	0	0	0
2008-03-06	Asanta-300m west Asanta		-2	07:41:00	31	C	?	2	0	0	31	R3YRWY, R3RWYR	0	1	24	6	0	0
2008-03-06	Asanta-300m west Asanta		-2	07:53:00	15	C	?	?	0	0	15		0	0	0	0	0	15
2008-03-06	Ankobra		-2	07:56:00	3	C	0	0	0	0	3		0	0	3	0	0	0
2008-03-06	Asanta		-2	07:56:00	57	C	0	0	0	0	57		0	0	54	3	0	0
2008-03-06	Asanta-Ankobra		-2	08:11:00	53	C	0	0	0	0	53		0	0	51	2	0	0
2008-03-06	Asanta-Bobrama		-2	08:16:00	12	C	?	?	0	0	12		0	1	11	0	0	0
2008-03-06	Asanta-Ankobra		-2	08:33:00	88	C	0	0	0	0	88		0	0	88	0	0	0
2008-01-12	Amansuri inlet east		-1	12:16:00	121	C	47	3	0	0	47	R3WWWG, R3YRRY, R3YYWW	0	0	121	0	0	0
2008-01-12	Amansuri inlet east		-1	12:18:00	48	C	48	3	0	0	48		0	0	48	0	0	0
2008-01-12	Amansuri inlet east		-1	12:33:00	813	C	?	?	0	0	813	R3RRGG, R3YYWW	0	16	739	58	0	0
2008-01-13	Amansuri inlet east		-1	12:00-12:06	423	C	156	8	0	0	423	?, R3YWRY, R3RGYR, R3RGGY, R3RRGR, ?, ? R3YRGG	3	59	340	21	0	0
2008-01-13	Amansuri inlet east		-1	12:16:00	1	C	1	1	0	0	1	R3WGWG	0	0	1	0	0	0
2008-01-13	Amansuri inlet east		-1	12:18:00	1	C	1	1	0	0	1	R3RRGG	0	0	1	0	0	0
2008-01-13	Amansuri inlet east		-1	12:20:00	1	C	1	1	0	0	1	R3WRGG	0	0	1	0	0	0
2008-01-13	Amansuri inlet east		-1	12:24:00	1	C	1	1	0	0	1	R3RRRW	0	0	1	0	0	0
2008-01-13	Amansuri inlet east		-1	12:26:00	2	C	2	2	0	0	2	R3RGRW, R3RGWW	0	0	2	0	0	0
2008-01-16	Kikam		-1	15:06:00	101	C	?	2	0	0	101	R3YWRY, R3YWYY	0	0	101	0	0	0
2008-01-16	Halfway Kikam-Esiama		-1	15:46:00	47	C	47	2	0	0	47	R3WGWG, R3WWRR	0	0	47	0	0	0
2008-01-16	Halfway Kikam-Esiama		-1	15:55:00	47	C	47	2	0	0	47	R3WGWG, R3WWRR	0	0	0	0	0	47
2008-01-22	Amansuri inlet east		-1	10:10:00	90	C	?	?	0	0	90		0	0	90	0	0	0
2008-01-21	Amansuri inlet east		-1	08:54:00	51	C	51	2	0	0	51	R3YRWR, R3RYYG	0	0	51	0	0	0
2008-01-21	Amansuri inlet east		-1	08:54:00	68	C	68	8	0	0	68		0	17	51	0	0	0
2008-01-24	2.5 km west amansuri		-1	12:05:00	8	C	?	?	0	0	8		0	0	8	0	0	0
2008-01-23	200m west Amansuri		-1	10:57:00	198	C	183	2	0	0	198	R3RYGY, R3RGWG	0	0	198	0	0	0
2008-01-25	300 west Amansuri		-1	11:25:00	305	C	?	?	0	0	305		0	81	215	9	0	0
2008-01-25	300 west Amansuri		-1	11:50:00	457	C	?	?	0	0	457		1	48	391	17	0	0
2008-01-25	1 km west of Amansuri		-1	11:23:00	178	C	?	?	0	0	178		0	48	105	25	0	0
2008-01-25	1 km west of Amansuri		-1	11:33:00	95	C	?	?	0	0	95		0	55	40	0	0	0
2008-01-26	500m east of Asanta		-1	12:21:00	41	C	?	3	0	0	41	R3YYWW	0	3	36	2	0	0
2008-01-26	500m east of Asanta		-1	12:41:00	57	C	?	3	0	0	57	R3YYWW	0	0	56	1	0	0
2008-01-28	2 km west Amansuri		-1	13:28:00	489	C	?	?	0	0	489		0	65	416	8	0	0
2008-02-18	1st stream east of esiama		-1	07:45:00	2	C	0	0	0	0	2		0	0	0	0	0	2
2008-02-18	1st -2nd stream	Beach	-1	07:52:00	46	C	4	1	0	0	46	R3WWRR	0	0	46	0	0	0
2008-02-18	1st -2nd stream		-1	08:03:00	41	C	41	4	0	0	41	R3GGGY, R3WWGY	0	0	41	0	0	0
2008-02-18	2nd stream east of kikam		-1	08:24:00	9	C	9	1	0	0	9	R3RYYY	0	0	9	0	0	0
2008-02-18	2nd stream-Kikam		-1	08:36:00	41	C	41	2	0	0	41	R3YWYY, R3YWRY	0	0	41	0	0	0
2008-02-22	100m west Bobrama		-1	10:22:00	4	C	4	0	0	0	4		0	0	4	0	0	0
2008-02-22	300m west Bobrama		-1	10:24:00	16	C	14	2	0	0	16	R3YWRR, R3YYWW	0	0	16	0	0	0
2008-02-22	100m east of HVP		-1	10:40:00	22	C	?	8	0	0	22	In booklet edward	0	0	22	0	0	0
2008-02-22	100m east of HVP		-1	10:50:00	77	C	?	?	0	0	77		2	0	70	5	0	0
2008-02-22	HVP stream outlet		-1	11:04:00	481	C	?	41	0	0	481	In booklet edward	0	360	58	63	0	0
2008-02-25	HVP stream outlet		-1	11:58:00	140	C	?	7	0	0	140	R3YRGY, R3GGYR, R3RGGY, R3RWRR, R3WGWG, R3YYWW, R3WGGR	1	116	8	15	0	0
2008-02-25	HVP stream outlet		-1	12:25:00	256	C	?	7	0	0	256	R3YRGY, R3GGYR, R3RGGY, R3RWRR, R3WGWG, R3YYWW, R3WGGR	2	176	50	28	0	0
2008-03-06	Asanta-Bobrama		-1	08:47:00	37	C	0	0	0	0	37		0	0	34	0	0	3
2008-03-06	Asanta		-1	08:43:00	8	C	?	?	0	0	8		0	0	8	0	0	0
2008-03-06	100m east of Bobrama		-1	08:55:00	10	C	10	1	0	0	10	R3YRWW	0	0	10	0	0	0
2008-03-06	Bobrama		-1	09:00:00	49	C	0	0	0	0	49		0	0	49	0	0	0
2008-03-06	Bobrama-HVP		-1	09:21:00	49	C	18	4	0	0	49	R3YRWR	0	0	49	0	0	0
2008-01-12	Amansuri inlet east		1	13:00:00	926	C	?	12	0	0	926	R3RGWG, R3WWRR, R3YRRY, R3WRYY, R3WWRW, R3YYWW, R3YRRW, R3RRGG, R3RGYG, R3RGYR, R3WWGY, R3RRRW	118	41	51	82	0	0
2008-01-13	Amansuri inlet east		1	12:45:00	1	C	1	1	0	0	1	R3YRGY	0	0	0	1	0	0
2008-01-13	Amansuri inlet east		1	12:46:00	1	C	1	1	0	0	1	R3YWRY	0	1	0	0	0	0
2008-01-13	Amansuri inlet east		1	12:47:00	2	C	2	2	0	0	2	R3RRGG, R3YGYY	0	0	2	0	0	0
2008-01-13	Amansuri inlet east		1	12:50:00	2	C	2	2	0	0	2	R3RGWW, R3WGGG	0	0	2	0	0	0
2008-01-16	Halfway Kikam-Esiama		1	16:00:00	30	C	0	0	0	0	30		0	0	0	0	0	30
2008-01-16	Esiama	High up on beach	1	16:25:00	33	C	33	1	0	0	33	R3YGYY	0	0	33	0	0	0
2008-01-18	Esiama-1st stream east		1	07:44:00	12	C	0	0	0	0	12		0	0	12	0	0	0
2008-01-18	Esiama-1st stream east		1	07:44:00	12	C	0	0	0	0	12		0	0	0	0	0	12
2008-01-21	Amansuri inlet east		1	09:52:00	68	C	68	8	0	0	68		0	50	18	0	0	0
2008-01-21	Amansuri inlet west		1	10:30:00	18	C	18	0	0	0	18		0	12	2	4	0	0
2008-01-21	Amansuri inlet west		1	10:30:00	42	C	?	?	0	0	42		0	40	2	2	0	0
2008-01-21	Amansuri inlet west		1	10:30:00	91	C	?	?	0	0	91		0	38	53	0	0	0
2008-01-22	Amansuri inlet west		1	10:27:00	169	C	?	0	0	0	169		0	0	169	0	0	0
2008-01-22	Amansuri inlet west		1	11:15:00	257	C	?	0	0	0	257		0	174	73	10	0	0
2008-01-22	Amansuri inlet east		1	11:15:00	450	E	?	?	0	0	450		0	396	45	9	0	0
2008-01-23	200m west Amansuri		1	11:40:00	198	C	183	2	0	0	198	R3RYGY, R3RGWG	0	0	0	0	198	0
2008-01-23	200m west Amansuri		1	11:47:00	198	C	183	2	0	0	198	R3RYGY, R3RGWG	0	0	0	0	0	198
2008-01-24	HVP stream outlet		1	11:47:00	292	C	?	?	0	0	292	In book	1	212	60	20	0	0
2008-01-24	HVP stream outlet		1	12:18:00	277	C	?	?	0	0	277	In book	0	263	9	5	0	0
2008-01-25	300 west Amansuri		1	12:15:00	455	C	?	?	0	0	455		13	75	333	34	0	0
2008-01-25	300 west Amansuri		1	12:50:00	521	C	?	?	0	0	521		30	120	151	210	0	0
2008-01-25	1 km west of Amansuri		1	12:16:00	98	C	?	?	0	0	98		30	45	23	0	0	0
2008-01-25	1 km west of Amansuri		1	12:52:00	500	E	?	?	0	0	500		0	400	25	75	0	0
2008-01-26	500m east of Asanta		1	13:03:00	26	C	26	1	0	0	26		0	0	26	0	0	0
2008-01-26	100m west of Asanta		1	13:24:00	42	C	42	3	0	0	42	R3YYWW, R3YGWR, R3YYGR	0	23	0	19	0	0
2008-01-26	100m west of Asanta		1	13:32:00	42	C	42	3	0	0	42	R3YYWW, R3YGWR, R3YYGR	0	0	0	0	0	42
2008-01-26	Asanta		1	13:39:00	33	C	33	1	0	0	33	R3YYWW	0	0	33	0	0	0
2008-02-19	Esiama		1	09:15:00	22	C	22	1	0	0	22	R3YRWW	0	0	22	0	0	0
2008-02-19	Esiama		1	09:40:00	38	C	8	1	0	0	38	R3YRWW	0	0	38	0	0	0
2008-01-28	2.5km west Amansuri		1	14:32:00	549	C	?	?	0	0	549		5	430	82	32	0	0
2008-02-20	Amansuri inlet west		1	10:08:00	5	C	5	1	0	0	5	R3RGWW	0	0	5	0	0	0
2008-02-20	100m west Amansuri		1	10:25:00	8	C	?	?	0	0	8		0	0	8	0	0	0
2008-02-20	900m west Amansuri		1	10:35:00	13	C	?	?	0	0	13		0	0	13	0	0	0
2008-02-20	1.2-2 km west Amansuri		1	10:44:00	20	C	20	2	0	0	20	R3GGGW, R3RYYY	0	0	20	0	0	0
2008-02-20	1.2-2 km west Amansuri		1	10:57:00	25	C	25	1	0	0	25	R3RYGY	0	0	25	0	0	0
2008-02-20	1.2-2 km west Amansuri		1	11:00:00	25	C	10	1	0	0	25	R3RWYY	0	0	25	0	0	0
2008-02-25	HVP stream outlet		1	12:54:00	328	C	?	7	0	0	256	R3YRGY, R3GGYR, R3RGGY, R3RWRR, R3WGWG, R3YYWW, R3WGGR	4	200	60	66	0	0
2008-02-25	100m west of Bobrama		1	13:17:00	3	C	3	0	0	0	3		0	0	3	0	0	0
2008-03-06	200m east HVP		1	09:46:00	17	C	0	0	0	0	17		0	0	16	1	0	0
2008-03-06	HVP stream outlet		1	09:53:00	4	C	4	1	0	0	4		0	1	3	0	0	0
2008-03-06	HVP-Asenko		1	10:14:00	4	C	4	0	0	0	4		0	0	4	0	0	0
2008-03-06	Asenko-1st stream east Asenko		1	10:20:00	17	C	17	2	0	0	17	R3GGWR, R3WYRW	0	0	17	0	0	0
2008-03-06	1st stream west asenko		1	10:30:00	12	C	12	2	0	0	12		0	0	12	0	0	0
2008-01-13	300m west Amansuri		2	13:52:00	59	C	?	?	0	0	59		4	0	50	5	0	0
2008-01-13	500m west Amansuri	30N 0567996, 0546438	2	14:02:00	1	C	1	1	0	0	1	R3RGWR	0	0	1	0	0	0
2008-01-13	500m west Amansuri	30N 0566857, 0546594	2	14:30:00	277	C	223	6	0	0	277	R3YRYY, R3RGWY, R3RGYW, R3YRWR, R3WR??, R3YRRR	0	158	107	12	0	0
2008-01-13	700m west amansuri		2	14:32:00	214	C	?	3	0	0	214		0	150	50	31	0	0
2008-01-13	500m west Amansuri		2	14:40:00	298	C	?	?	0	0	298		0	205	85	8	0	0
2008-01-16	ca. 400 m east Amansuri	30N 0569726, 0545822	2	17:15:00	105	C	?	6	0	0	105	R3WWYR, R3YWRR, R3RGYR, R3RRGR, R3WWWR, R3RYRW	0	0	105	0	0	0
2008-01-18	Esiama-Amansuri		2	08:06:00	20	C	20	0	0	0	20		0	0	20	0	0	0
2008-01-18	Esiama-Amansuri		2	08:16:00	36	C	36	1	0	0	36	R3WRYY	0	0	36	0	0	0
2008-02-17	Asenko		2	09:24:00	32	C	32	4	0	0	32	R3WRRG, R3GGRY, R3YWRR	0	0	32	0	0	0
2008-02-17	Asenko		2	09:38:00	32	C	32	4	0	0	32	R3WRRG, R3GGRY, R3YWRR	0	0	32	0	0	0
2008-01-19	Esiama-Kikam		2	08:56:00	6	C	6	0	0	0	6		0	0	6	0	0	0
2008-01-19	Esiama-Kikam		2	09:05:00	7	C	7	0	0	0	7		0	0	7	0	0	0
2008-01-19	Esiama-Kikam		2	09:43:00	12	C	12	0	0	0	12		0	0	12	0	0	0
2008-01-19	Esiama-Kikam		2	09:52:00	9	C	9	0	0	0	9		0	0	9	0	0	0
2008-01-23	West of Amansuri	Opposite remains stone hut	2	12:02:00	35	C	0	0	0	0	35		0	0	0	0	0	35
2008-01-23	West of Amansuri	Opposite remains stone hut	2	12:04:00	50	C	0	0	0	0	50		0	0	0	0	0	50
2008-01-23	west of Amansuri	Opposite remains stone hut	2	12:36:00	100	E	0	0	0	0	100		0	0	0	0	0	100
2008-01-24	HVP stream outlet		2	13:24:00	269	C	?	?	0	0	269	In book	0	212	0	57	0	0
2008-01-25	300 west Amansuri		2	13:15:00	392	C	?	?	0	0	392		1	301	56	34	0	0
2008-01-25	Amansuri inlet east		2	14:05:00	34	C	?	2	0	0	34	R3YWRG, ?	0	27	0	7	0	0
2008-01-25	Amansuri inlet east		2	14:09:00	38	C	?	?	0	0	38		0	18	4	15	0	0
2008-01-26	HVP stream outlet		2	14:28:00	329	C	?	8	0	0	329	R3YYYG, R3RGGY, R3WWRR, R3YYGW, R3WRRG, R3YYRW, R3WWGY, R3WGWG	0	303	0	26	0	0
2008-02-17	Asenko-HVP		2	09:46:00	600	E	?	6	0	0	600	R3GGWW, R3YWYY, R3GGRR, R3YRWG, R3WWWR, R3WWRY	0	30	540	30	0	0
2008-02-19	Esiama		2	09:55:00	11	C	?	?	0	0	11		0	0	11	0	0	0
2008-02-19	1.2km east of Esiama		2	10:12:00	24	C	9	1	0	0	24	R3GGGY	0	0	24	0	0	0
2008-02-19	1.2km east of Esiama		2	10:21:00	50	C	?	1	0	0	50	R3RRGG	0	0	35	15	0	0
2008-02-19	1.2km east of Esiama		2	10:31:00	52	C	?	1	0	0	52	R3RRGG	0	0	52	0	0	0
2008-02-20	1.2-2 km west Amansuri		2	11:02:00	29	C	15	1	0	0	29	R3GGGY	3	0	26	0	0	0
2008-02-20	1.2-2 km west Amansuri		2	11:05:00	18	C	?	?	0	0	18		0	0	18	0	0	0
2008-02-20	1.2-2 km west Amansuri		2	11:14:00	61	C	?	?	0	0	61		1	0	60	0	0	0
2008-02-20	2 km west Amansuri		2	11:56:00	5	C	5	1	0	0	5	R3RYWG	0	0	5	0	0	0
2008-02-20	2 km west Amansuri		2	12:02:00	13	C	?	?	0	0	13		0	0	13	0	0	0
2008-02-22	250m east asenko		2	12:44:00	28	C	?	1	0	0	28	R3RWRG	0	0	28	0	0	0
2008-02-22	200m east asenko		2	12:48:00	16	C	?	?	0	0	16		0	0	16	0	0	0
2008-02-22	Asenko		2	12:53:00	8	C	8	1	0	0	8	R3YRWR	0	0	8	0	0	0
2008-02-22	100m west asenko		2	13:01:00	7	C	7	0	0	0	7		0	0	7	0	0	0
2008-02-22	250m west Asenko		2	13:06:00	21	C	20	2	0	0	21	In booklet edward	0	1	20	0	0	0
2008-03-06	2nd stream west asenko-Kikam		2	10:40:00	19	C	19	2	0	0	19		0	0	19	0	0	0
2008-03-06	200m east Kikam		2	10:53:00	3	C	3	1	0	0	3		0	0	3	0	0	0
2008-03-06	Kikam		2	11:01:00	5	C	5	0	0	0	5		0	0	5	0	0	0
2008-03-06	Kikam-1km west Kikam		2	11:05:00	40	C	0	0	0	0	40		0	0	40	0	0	0
2008-03-06	5th stream east of Esiama		2	11:11:00	30	C	0	0	0	0	30		0	0	30	0	0	0
2008-03-06	4th -5th stream east Esiama		2	11:21:00	27	C	0	0	0	0	27		0	0	27	0	0	0
2008-01-13	500m west Amansuri		3	15:16:00	4	C	4	0	0	0	4		0	0	4	0	0	0
2008-01-13		30N 0565798, 0546857	3	15:15:00	159	C	159	1	0	0	159	R3RGWY	0	0	159	0	0	0
2008-01-13		30N 0565926, 0546817	3	15:21:00	1	C	1	1	0	0	1	R3WYRW	0	0	0	1	0	0
2008-01-13		30N 0565926, 0546817	3	15:40:00	47	C	47	2	0	0	47	R3WYRW	0	0	0	0	0	47
2008-01-18	1st stream-Kikam		3	08:50:00	10	C	10	1	0	0	10	R3RRRW	0	0	10	0	0	0
2008-01-18	1st stream-Kikam		3	09:13:00	35	C	?	0	0	0	35		0	5	2	28	0	0
2008-01-18	1st stream-Kikam		3	09:23:00	74	C	?	0	0	0	74		0	7	46	21	0	0
2008-01-18	Amansuri inlet east		3	08:57:00	17	C	?	?	0	0	17		0	10	7	0	0	0
2008-01-18	1km west Amansuri		3	09:42:00	8	C	8	1	0	0	8	R3RYGY	0	8	0	0	0	0
2008-01-19	Kikam		3	10:03:00	15	C	15	1	0	0	15	R3WWYW	0	0	14	1	0	0
2008-01-19	Kikam-Asenko		3	10:20:00	6	C	6	1	0	0		R3YWYY	0	0	6	0	0	0
2008-01-19	Asenko		3	10:53:00	193	C	?	21	0	0	193	In booklet edward	0	174	4	15	0	0
2008-01-19	Asenko		3	10:53:00	45	C	?	?	0	0	45		0	39	1	5	0	0
2008-01-21	1.5 km west Amansuri		3	12:11:00	1150	E	?	21	0	0	1150	In booklet edward	0	805	287	58	0	0
2008-01-22	Amansuri inlet west		3	12:48:00	627	C	?	?	0	0	627		1	541	23	62	0	0
2008-01-22	Amansuri inlet east		3	12:35:00	1200	E	?	?	0	0	1200		60	1140	0	0	0	0
2008-01-22	Amansuri inlet east		3	12:55:00	1200	E	?	?	0	0	1200		60	1040	100	0	0	0
2008-01-23	west of Amansuri	400m past stone house towards Amansuri	3	13:25:00	10	C	10	0	0	0	10		0	10	0	0	0	0
2008-01-24	HVP stream outlet		3	13:42:00	269	C	?	?	0	0	269	In book	0	268	1	0	0	0
2008-01-24	HVP stream outlet		3	14:07:00	269	C	?	?	0	0	269	In book	0	256	0	13	0	269
2008-01-26	HVP stream outlet		3	14:46:00	329	C	?	8	0	0	329	R3YYYG, R3RGGY, R3WWRR, R3YYGW, R3WRRG, R3YYRW, R3WWGY, R3WGWG	0	333	0	6	0	0
2008-01-26	HVP stream outlet		3	15:00:00	329	C	?	8	0	0	329	R3YYYG, R3RGGY, R3WWRR, R3YYGW, R3WRRG, R3YYRW, R3WWGY, R3WGWG	0	340	0	8	0	0
2008-01-26	HVP stream outlet		3	15:18:00	329	C	?	8	0	0	329	R3YYYG, R3RGGY, R3WWRR, R3YYGW, R3WRRG, R3YYRW, R3WWGY, R3WGWG	0	340	0	8	0	0
2008-01-26	HVP stream outlet		3	15:34:00	329	C	?	8	0	0	329	R3YYYG, R3RGGY, R3WWRR, R3YYGW, R3WRRG, R3YYRW, R3WWGY, R3WGWG	0	281	9	42	0	0
2008-02-17	Asenko-HVP		3	10:00:00	600	E	?	6	0	0	600	R3GGWW, R3YWYY, R3GGRR, R3YRWG, R3WWWR, R3WWRY	0	0	597	3	0	0
2008-02-17	Asenko-HVP		3	10:08:00	300	E	?	?	0	0	300		0	0	300	0	0	0
2008-02-17	Asenko-HVP		3	10:31:00	120	C	?	?	0	0	120		0	2	115	3	0	0
2008-02-17	Asenko-HVP	Dead palmtrees before bobrama	3	10:46:00	86	C	?	?	0	0	86		0	39	45	2	0	0
2008-02-19	2km east of Esiama		3	10:56:00	65	C	43	2	0	0	65	R3RWRR, R3RWGG	0	0	55	10	0	0
2008-02-19	Kikam		3	11:23:00	4	C	4	0	0	0	4		0	0	4	0	0	0
2008-02-19	Kikam		3	11:27:00	8	C	8	1	0	0	8	R3RYRR	0	0	8	0	0	0
2008-02-19	Kikam		3	11:38:00	7	C	7	1	0	0	7	R3YRWG	0	0	7	0	0	0
2008-02-19	Kikam		3	11:38:00	60	C	?	?	0	0	60		0	0	0	0	0	60
2008-01-25	Halfway Amansuri-esiama		3	14:47:00	15	C	15	0	0	0	15		0	0	15	0	0	0
2008-02-20	2.5-3km west Amansuri		3	12:13:00	24	C	?	4	0	0	24	R3YGYW, R3WYRW, R3RGYW, R3RGYR	0	0	24	0	0	0
2008-02-20	2.5-3km west Amansuri		3	12:19:00	3	C	?	?	0	0	3		0	0	3	0	0	0
2008-02-20	2.5-3km west Amansuri		3	12:29:00	30	C	?	?	0	0	30		0	0	29	1	0	0
2008-02-20	2.5-3km west Amansuri		3	12:34:00	25	C	?	?	0	0	25		0	1	24	0	0	0
2008-02-20	2.5-3km west Amansuri		3	12:38:00	55	C	?	?	0	0	55		8	11	10	26	0	0
2008-02-20	2.5-3km west Amansuri		3	12:43:00	27	C	?	?	0	0	27		0	0	27	0	0	0
2008-02-20	4km west amansuri		3	12:50:00	27	C	?	?	0	0	27		0	0	27	0	0	0
2008-02-22	Kikam		3	13:30:00	54	C	?	9	0	0	54	In booklet edward	0	0	54	0	0	0
2008-02-22	Kikam		3	13:40:00	15	C	?	?	0	0	15		0	0	15	0	0	0
2008-03-06	3rd -4th stream east esiama		3	11:52:00	29	C	0	0	0	0	29		1	0	26	2	0	0
2008-03-06	3rd stream east esiama		3	11:57:00	16	C	16	2	0	0	16	R3RWGY, R3WWRR	0	0	15	1	0	0
2008-03-06	2nd -3rd stream east esiama		3	12:06:00	17	C	17	2	0	0	17		0	0	17	0	0	0
2008-03-06	2nd stream		3	12:14:00	131	C	66	4	0	0	131		4	33	59	38	0	0
2008-03-06	2nd -1st stream		3	12:26:00	86	C	?	?	0	0	86		0	66	5	15	0	0
2008-03-06	2nd -1st stream		3	12:35:00	65	C	48	3	0	0	65		0	58	4	3	0	0
2008-01-13	Amansuri inlet west		4	15:55:00	169	C	?	4	0	0	169	R3YGYW, R3YRWR, R3RGYW, R3YRWY	0	98	33	38	0	0
2008-01-13	Amansuri inlet west		4	16:29:00	158	C	?	1	0	0	158	R3RGWY	0	70	66	2	0	0
2008-01-13	Amansuri-Esiama		4	16:32:00	150	E	?	?	0	0	150		0	110	40	0	0	0
2008-01-16	1st stream east of esiama		4	07:55:00	13	C	13	4	0	0	13	R3YWYG, R3RYRR, R3RGGY, R3YWRY	0	0	13	0	0	0
2008-01-17	Amansuri inlet east		4	09:04:00	30	C	0	0	0	0	30		0	0	0	0	0	30
2008-01-17	Esiama		4	08:51:00	6	C	6	0	0	0	6		0	1	5	0	0	0
2008-01-17	Esiama-Kikam		4	09:00:00	2	C	2	0	0	0	2		0	0	2	0	0	0
2008-01-17	Kikam		4	09:10:00	10	C	?	?	0	0	10		0	0	0	0	0	10
2008-01-17	Kikam-Asenko		4	09:15:00	43	C	43	1	0	0	43	R3YWYY	0	3	40	0	0	0
2008-01-18	1st stream-Kikam		4	09:41:00	22	C	?	0	0	0	22		0	13	2	7	0	0
2008-01-18	1st -2nd stream		4	10:03:00	24	C	24	0	0	0	24		0	5	8	11	0	0
2008-01-18	1.2 km west Amansuri		4	10:15:00	1118	C	?	11	0	0	1118	R3YGYY, R3RWYY, R3RRGG, R3RRYR, R3YRRR, R3WGGG, R3YYRW, R3YWGW, R3YWYG, R3WWGW, R3WWGR	0	895	123	100	0	0
2008-01-22	Amansuri inlet west		4	13:33:00	627	C	?	?	0	0	627		2	620	2	3	0	0
2008-01-23	150 m east of Amansuri		4	14:20:00	182	C	65	4	0	0	182	In book	0	165	14	3	0	0
2008-01-24	HVP stream outlet		4	14:46:00	269	C	?	?	0	0	269	In book	0	261	0	21	0	0
2008-01-24	HVP stream outlet		4	15:01:00	282	C	?	?	0	0	282	In book	8	202	7	65	0	0
2008-01-24	HVP stream outlet		4	15:27:00	282	C	?	?	0	0	282	In book	0	208	0	74	0	0
2008-01-26	HVP stream outlet- Asenko		4	15:49:00	32	C	32	0	0	0	32		0	0	32	0	0	0
2008-01-26	Asenko		4	15:52:00	27	C	0	0	0	0	27		0	0	27	0	0	0
2008-01-26	Kikam		4	16:01:00	17	C	17	0	0	0	17		0	0	17	0	0	0
2008-01-26	4th stream east of Esiama		4	16:14:00	10	C	10	0	0	0	10		0	0	10	0	0	0
2008-01-26	4th stream east of Esiama		4	16:24:00	30	C	0	0	0	0	30		0	0	30	0	0	0
2008-02-15	Esiama		4	08:21:00	38	C	21	2	0	0	38	R3RYYY, R3YWRG	0	0	38	0	0	0
2008-02-17	200m west of HVP		4	10:55:00	34	C	?	?	0	0	34		0	0	34	0	0	0
2008-02-17	HVP stream outlet		4	11:35:00	30	C	?	?	0	0	30		1	2	27	0	0	0
2008-02-17	HVP stream outlet	Fresh water pool HVP	4	11:46:00	30	C	?	?	0	0	30		21	0	9	0	0	0
2008-02-19	Halfway Kikam-Asenko		4	12:00:00	20	C	?	4	0	0	20	R3GGRY, R3WWRW, R3RWYY, R3GYYW	0	15	5	0	0	0
2008-02-19	Asenko		4	12:12:00	14	C	14	4	0	0	14	R3YYRG, R3RWWY, R3GGGY, R3RWWR	0	1	13	0	0	0
2008-03-06	2nd -1st stream		4	12:40:00	65	C	48	3	0	0	65		0	0	0	0	65	0
2008-03-06	2nd -1st stream		4	12:44:00	54	C	0	0	0	0	54		0	0	54	0	0	0
2008-03-06	1st stream east of esiama		4	12:52:00	34	C	0	0	0	0	34		0	4	30	0	0	0
2008-03-06	1st stream east of esiama		4	12:57:00	20	C	0	0	0	0	20		0	0	0	0	0	20
2008-01-11	Amansuri inlet east		5	16:11:00	530	C	?	17	0	0	17	R3WGGW, R3WWRW, R3WGWG, R3YRWR, R3YYRG, R3YYGW, R3WRGG, R3WWGR, R3YWGG, R3WWRR, R3YWWR, R3YRRY, R3YYGW, R3WWYR, R3YGYW, R3WRRG, R3YRYY	0	530	0	0	0	0
2008-01-11	Amansuri inlet east		5	16:45:00	530	C	?	17	0	0	17	R3WGGW, R3WWRW, R3WGWG, R3YRWR, R3YYRG, R3YYGW, R3WRGG, R3WWGR, R3YWGG, R3WWRR, R3YWWR, R3YRRY, R3YYGW, R3WWYR, R3YGYW, R3WRRG, R3YRYY	0	464	66	0	0	0
2008-01-13	Amansuri inlet west		5	16:55:00	600	E	0	0	0	0	600						0	600
2008-01-16	1st stream-Kikam		5	08:18:00	3	C	3	0	0	0	3		0	0	3	0	0	0
2008-01-16	1st stream-Kikam		5	08:23:00	1	C	1	0	0	0	1		0	0	1	0	0	0
2008-01-16	2nd stream east of kikam		5	08:35:00	2	C	2	0	0	0	2	R3YRWG, R3YWYY	1	0	1	0	0	0
2008-01-16	2nd stream east of kikam		5	08:45:00	2	C	2	2	0	0	2	R3RGRW, R3YWYY	0	0	2	0	0	0
2008-01-16	2nd stream east of kikam		5	08:49:00	4	C	4	1	0	0	4	R3WWGY	0	0	4	0	0	0
2008-01-17	1 km west of Amansuri		5	10:27:00	800	E	?	11	0	0	800	R3RGWG,R3YYRW, R3RGWW, R3RYRY, R3YRYY, R3YRRW, R3WWGR, R3RRGG, R3WRGG, R3YGYY, R3WYRW	0	800	0	0	0	0
2008-01-17	1 km west of Amansuri		5	10:28:00	1	C	1	1	0	0	1	R3RGWG	0	0	1	0	0	0
2008-01-18	HVP stream outlet		5	10:58:00	222	C	?	19	0	0	222	In book	0	191	0	31	0	0
2008-01-18	HVP stream outlet		5	11:25:00	222	C	?	19	0	0	222	In book	0	213	0	6	0	0
2008-01-18	HVP stream outlet		5	11:37:00	222	C	?	19	0	0	222	In book	0	212	0	7	0	0
2008-01-23	150 m east of Amansuri		5	15:00-15:25	182	C	65	4	0	0	182	In book	0	13	154	15	0	0
2008-01-23	150 m east of Amansuri		5	15:30:00	182	C	65	4	0	0	182	In book	0	17	96	2	0	0
2008-01-23	150 m east of Amansuri		5	15:40:00	114	C	?	?	0	0	114		0	0	114	0	0	0
2008-01-23	150 m east of Amansuri		5	15:44:00	10	C	10	2	0	0	10	R3RGYR, R3RRRW	0	0	10	0	0	0
2008-01-23	150 m east of Amansuri		5	15:49:00	50	C	10	2	0	0	50	R3RGYR, R3RRRW	0	0	0	0	0	50
2008-01-24	HVP stream outlet	Forage at stream inlet	5	15:44:00	12	C	?	?	0	0	12		0	0	12	0	0	0
2008-01-24	HVP stream outlet		5	16:15:00	349	C	?	?	0	0	349	In book	2	58	192	97	0	349
2008-01-22	amansuri inlet east		5	15:15:00	1500	E	?	?	0	0	700		0	0	0	0	0	700
2008-02-15	300m east Amansuri		5	09:28:00	3	C	3	2	0	0	3	R3RGGG, R3RGWR	0	1	2	0	0	0
2008-02-17	HVP stream outlet		5	11:53:00	201	C	?	?	0	0	201		11	43	46	91	0	0
2008-02-17	HVP stream outlet		5	12:30:00	307	C	?	?	0	0	307		6	121	134	46	0	0
2008-02-19	Asenko		5	12:45:00	5	C	3	1	0	0	5		0	0	5	0	0	0
2008-02-19	300m east asenko		5	13:25:00	750	E	?	22	0	0	750	In booklet edward	4	685	0	61	0	0
2008-03-07	Esiama		5	14:27:00	50	E	0	0	0	0	50		0	0	0	0	0	50
2008-03-07	1st stream east of esiama		5	14:40:00	113	C	0	0	0	0	113		5	3	91	14	0	0
2008-03-07	1st stream east of esiama		5	14:49:00	86	C	0	0	0	0	86		0	2	78	6	0	0
2008-03-07	1st stream east of esiama		5	15:03:00	158	C	0	0	0	0	158		2	2	151	3	0	0
2008-03-07	1st stream east of esiama		5	15:04:00	158	C	0	0	0	0	158		0	0	0	0	0	158
2008-03-07	1st stream east of esiama		5	15:05:00	28	C	28	0	0	0	28		0	3	20	5	0	0
2008-01-16	Asenko		6	09:14:00	1	C	1	1	0	0	1	R3YYWW	0	0	1	0	0	0
2008-01-16	Asenko		6	09:19:00	18	C	18	1	0	0	18	R3YRRG	0	0	18	0	0	0
2008-01-16	HVP stream outlet	Beach, near freshwater outlet	6	09:28:00	1	C	1	1	0	0	1	R3YYGW	0	0	1	0	0	0
2008-01-16	HVP stream outlet		6	09:37:00	13	C	13	1	0	0	13	R3YGWR	0	0	13	0	0	0
2008-01-16	Asenko-Bobrama	In Alis notebook	6	09:42:00	63	C	?	6	0	0	63	R3RGGW, R3YWWR, R3YRRW, R3YWGG, R3YYGW, R3YGWR	0	0	63	0	0	0
2008-01-17	2km west of Amansuri		6	10:45:00	1	C	1	1	0	0	1	R3RRGR	0	0	0	1	0	0
2008-01-17	2km west of Amansuri		6	10:55:00	600	E	?	11	0	0	600	R3RGYR, R3RYRG, R3RGWY, R3RGYY, R3RWWY, R3YRGY, R3WRGW, R3WGWG, R3WRYY, R3WYRW, R3RGWW	0	276	0	19	0	0
2008-01-17	2km west of Amansuri		6	11:27:00	600	E	?	11	0	0	600	R3RGYR, R3RYRG, R3RGWY, R3RGYY, R3RWWY, R3YRGY, R3WRGW, R3WGWG, R3WRYY, R3WYRW, R3RGWW	0	600	0	0	0	0
2008-01-17	Asenko		6	10:40:00	11	C	11	1	0	0	11	R3YYWW	0	5	6	0	0	0
2008-01-17	HVP stream outlet		6	10:53:00	500	C	?	12	0	0	12	R3YWRY, R3RYRR, R3WWRR, R3YWYY, R3RRRY, R3WWGW, R3YGWR, R3YYYG, R3RGRW, R3WWGY, R3YWWG, R3RGGY	8	388	60	35	0	0
2008-01-18	2.5 km west amansuri		6	12:25:00	1118	C	?	11	0	0	1118	R3YGYY, R3RWYY, R3RRGG, R3RRYR, R3YRRR, R3WGGG, R3YYRW, R3YWGW, R3YWYG, R3WWGW, R3WWGR	0	1105	6	7	0	0
2008-01-21	1.5 km west Amansuri		6	14:52:00	1150	E	?	21	0	0	1150	In booklet edward	0	978	0	172	0	0
2008-01-22	100m west of Amansuri		6	16:09:00	800	E	?	?	0	0	800		0	0	0	0	0	800
2008-01-22	Esiama-Amansuri		6	15:50:00	35	C	35	8	0	0	35	R3RGWW, R3RWYW, R3RGWG, R3RGWR, R3RRGR, R3RGWY, R3YGYW	0	0	35	0	0	0
2008-01-24	HVP stream outlet		6	16:47:00	208	C	?	?	0	0	208	In book	0	102	95	11	0	0
2008-01-24	Esiama		6	17:26:00	1	C	1	1	0	0	1	R3RGGW	0	0	1	0	0	0
2008-02-15	Amansuri inlet east		6	10:06:00	4	C	4	0	0	0	4		0	0	4	0	0	0
2008-02-15	300m east Amansuri		6	10:49:00	4	C	0	0	0	0	4		0	0	4	0	0	0
2008-02-15	500m east Amansuri		6	10:54:00	3	C	3	0	0	0	3		0	1	2	0	0	0
2008-02-19	300m east Asenko		6	14:00:00	800	E	?	13	0	0	800	In booklet edward	30	690	45	35	0	0
2008-02-19	300m east Asenko		6	14:35:00	463	C	?	?	0	0	463		0	320	105	38	0	0
2008-03-07	1st stream east of esiama		6	15:12:00	52	C	0	0	0	0	52		0	0	52	0	0	0
2008-03-07	1st -3rd stream east of Esiama		6	15:17:00	200	E	0	0	0	0	200		0	10	180	10	0	0
2008-03-07	1st stream east of esiama		6	15:29:00	192	C	146	5	0	0	192		2	14	125	53	0	0
2008-03-07	1st stream east of esiama		6	15:33:00	100	C	?	?	0	0	100		0	0	0	0	0	100
2008-03-07	1st stream east of esiama		6	15:34:00	192	C	146	5	0	0	192		0	0	0	0	0	192
2008-03-07	50m west 1st stream		6	15:37:00	203	C	0	0	0	0	203		0	0	194	9	0	0
2008-03-07	1st stream east of esiama		6	15:40:00	180	C	0	0	0	0	180		0	0	0	0	0	180
2008-03-07	1st stream east of esiama		6	15:50:00	154	C	0	0	0	0	154		0	15	124	15	0	0
